# Supplementary material for: Ag(i)-catalyzed asymmetric (2+4) annulation reaction of 5-alkenyl thiazolones: synthesis of enantioenriched spiro[cyclohexenamines-thiazolones]
Source: Royal Society of Chemistry journal article supplement (doi:10.1039/d4cc02957g), 2024-01-01
Supplement: d4cc02957g1.pdf [file d4cc02957g1.pdf]

# Ag(I)-Catalyzed Asymmetric (2 + 4) Annulation Reaction of 5-Alkenyl Thiazolones: Synthesis of Enantioenriched Spiro[cyclohexenamines-thiazolone]

Kavita Choudhary, Akanksha Santosh Deshpande, and Vinod K. Singh\*

<sup>a</sup>Department of Chemistry, Indian Institute of Technology Kanpur, Kanpur-208016, Uttar Pradesh (India)

\*E-mail: [vinodks@iitk.ac.in](mailto:vinodks@iitk.ac.in)

## Contents:

|                                                                |     |
|----------------------------------------------------------------|-----|
| General information                                            | S2  |
| Synthetic procedure for asymmetric annulation reactions        | S3  |
| Detailed optimization studies                                  | S4  |
| Characterization of annulated products <b>3</b>                | S9  |
| Synthetic procedure and characterization for products <b>4</b> | S18 |
| X-ray crystallographic figures and data of <b>3aa</b>          | S19 |
| Quantum yield calculation                                      | S22 |
| References                                                     | S22 |
| NMR spectra                                                    | S23 |
| HPLC graphs                                                    | S48 |

## General information

All reactions were carried out in oven-dried glassware with magnetic stirring.  $^1\text{H}$  and  $^{13}\text{C}\{^1\text{H}\}$  NMR spectra were recorded on Joel (500 MHz and 400 MHz) spectrometers in  $\text{CDCl}_3$ . Chemical shifts are reported in delta ( $\delta$ ) units, in parts per million (ppm). Tetramethylsilane or residual solvent peak was used as an internal standard for  $^1\text{H}$  and  $^{13}\text{C}\{^1\text{H}\}$  NMR, respectively. Coupling constants were reported in Hz. Splitting patterns are designated as s for singlet, d for doublet, t for triplet, q for a quartet, dd for doublet of doublet, and m for multiplet. Mass spectrometric analysis was done using the ESI-TOF method. Routine monitoring of reactions was performed using precoated silica gel TLC plates from E-Merck. All the chromatographic separations were carried out using silica gel (Merck's, 100–200 mesh). Enantiomeric excess was determined by HPLC analysis using Daicel chiral columns at 25 °C. Optical rotations were measured on a commercially available automatic polarimeter. Melting points were recorded on a digital melting point apparatus.  $\alpha,\alpha$ -Dicyanoalkenes (**1**)<sup>1</sup> and 5-alkenyl thiazolones (**2**)<sup>2</sup> were prepared by the previously reported methods.

Compound **3aa** was crystallized by slow evaporation of DCM/Hexane (1:1). The X-ray crystallography data of **3aa** was collected on a Bruker SMART APEX CCD diffractometer equipped with CRYO Industries low-temperature apparatus, and intensity data were collected using graphite-monochromated Mo K $\alpha$  radiation ( $\lambda = 0.71073 \text{ \AA}$ ) at 100 K. The CCDC number of compounds **3aa**: 2359432 contains the supplementary crystallographic data for this paper. These data can be obtained free of charge via [www.ccdc.cam.ac.uk/conts/retrieving.html](http://www.ccdc.cam.ac.uk/conts/retrieving.html) (or from the Cambridge Crystallographic Data Centre, 12 Union Road, Cambridge CB21EZ, UK; fax: (+44)1223- 336-033; or ([deposit@ccdc.cam.ac.uk](mailto:deposit@ccdc.cam.ac.uk))).

### Synthetic procedure (A) for asymmetric annulation reactions:

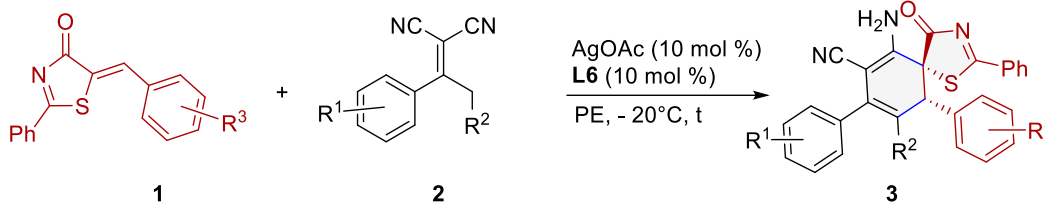

In an oven-dried round bottom flask equipped with a magnetic stir bar, Ag(OAc) (10 mol %, 1.6 mg, 0.01 mmol), ligand **L6** (10 mol %, 11.7 mg, 0.01 mmol) were taken, and 2 mL petroleum ether (PE) was added to it. The reaction mixture was stirred for 1 hour at room temperature. The round bottom flask containing the catalyst mixture was then cooled down to -20 °C. 5-alkenyl thiazolones, **1** (0.1 mmol, 1.0 equiv) and α,α-Dicyanoalkenes, **2** (0.15 mmol, 1.5 equiv) were added sequentially into the reaction mixture and continued stirring at the same temperature (-20 °C). After the complete consumption of the starting material (monitored by TLC), the reaction mixture was passed through a small silica pad to remove the catalyst. The resulting mixture was purified by flash column chromatography to get pure product **3**.

**Notes:** The diastereomeric ratio was determined by <sup>1</sup>H NMR of the crude reaction mixture. Racemic samples were prepared using the same procedure using AgOAc (10 mol %) with racemic BINAP (10 mol %).

### Procedure for 2 mmol scale-up reaction:

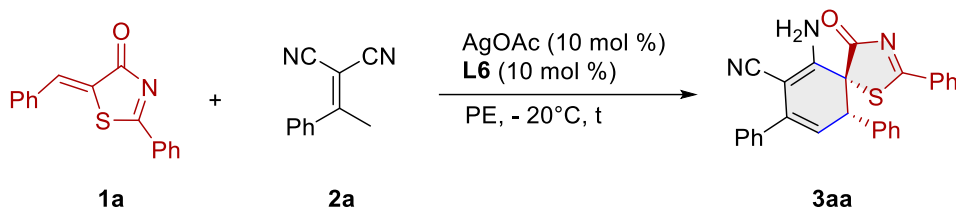

In an oven-dried round bottom flask equipped with a magnetic stir bar, Ag(OAc) (10 mol %, 33.3 mg, 0.2 mmol), ligand **L6** (10 mol %, 235.9 mg, 0.2 mmol) were taken, and 5 mL petroleum ether was added to it. The reaction mixture was stirred for 1 hour at room temperature. The round bottom flask containing the catalyst mixture was then cooled down to -20 °C. **1a** (530.6 mg, 2.0 mmol, 1.0 equiv) and **2a** (504.57 mg, 3.0 mmol, 1.5 equiv) were added sequentially into the reaction mixture and continued stirring at the same temperature (-20 °C). After the complete consumption of the starting material (monitored by TLC), the reaction mixture was passed through a small silica pad to remove the catalyst. The resulting mixture was purified by flash column chromatography to get pure product **3aa** in 78% yield (676 mg). **HPLC: 97% ee**, (IC, IPA/n-hexane = 30/70, flow rate = 1.0 mL/min, λ = 254 nm), t<sub>R</sub> = 25.04 min (major), 32.69 min (minor).

## Detailed optimization studies:

**Table S1.** Evaluation of Lewis acids

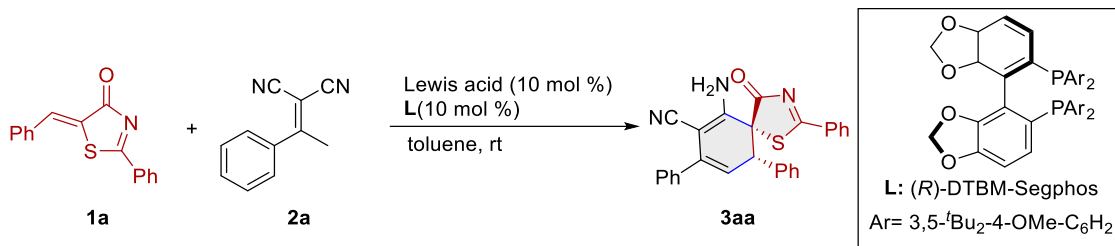

| Entry | Lewis acid                      | Time (h) | Yield <sup>b</sup> (%) | ee <sup>c</sup> (%) | dr <sup>d</sup> |
|-------|---------------------------------|----------|------------------------|---------------------|-----------------|
| 1     | Ag(OCOCF <sub>3</sub> )         | 7        | 85                     | 79                  | >20:1           |
| 2     | AgOAc                           | 6        | 96                     | 89                  | >20:1           |
| 3     | Ag(NO <sub>3</sub> )            | 8        | 75                     | 35                  | >20:1           |
| 4     | Ag(OTf)                         | 12       | 79                     | 75                  | >20:1           |
| 5     | Ag <sub>2</sub> CO <sub>3</sub> | 12       | 85                     | 80                  | >20:1           |
| 6     | Cu(OAc)                         | 24       | 78                     | 20                  | >20:1           |
| 7     | Cu(OTf) <sub>2</sub>            | 48       | 68                     | 55                  | >20:1           |
| 8     | AgF                             | 72       | 56                     | 54                  | >20:1           |
| 9     | AgI                             | 48       | trace                  | -                   | -               |

<sup>a</sup>Reaction conditions: **1a** (26.5 mg, 0.1 mmol, 1.0 equiv), **2a** (16.8 mg, 0.15 mmol, 1.5 equiv), **L** (10 mol %, 0.10 equiv) Lewis acid (10 mol %, 0.10 equiv), toluene (1.0 mL), rt. <sup>b</sup>Isolated yield. <sup>c</sup>Determined by chiral HPLC.

<sup>d</sup>Diastereomeric ratio (dr) determined by <sup>1</sup>H NMR of crude reaction mixture.

**Table S2.** Evaluation of ligands

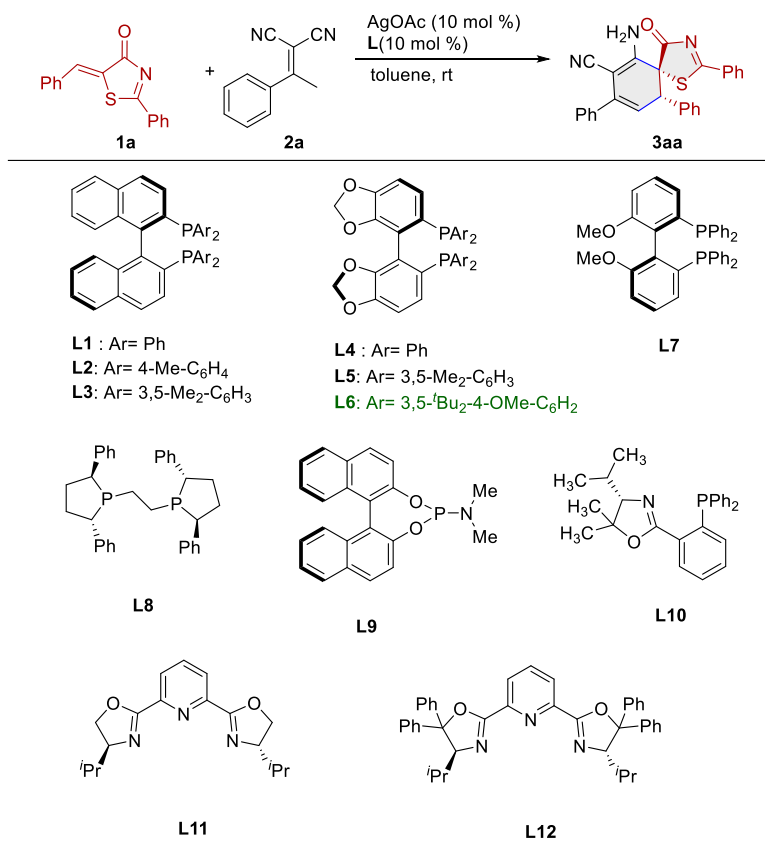

| Entry | Ligand    | Time (h) | Yield <sup>b</sup> (%) | ee <sup>c</sup> (%) | dr <sup>d</sup> |
|-------|-----------|----------|------------------------|---------------------|-----------------|
| 1     | <b>L1</b> | 4        | 80                     | 46                  | >20:1           |
| 2     | <b>L2</b> | 5        | 81                     | 67                  | >20:1           |
| 3     | <b>L3</b> | 7        | 51                     | 47                  | >20:1           |
| 4     | <b>L4</b> | 5        | 85                     | 44                  | >20:1           |
| 5     | <b>L5</b> | 6        | 89                     | 76                  | >20:1           |
| 6     | <b>L6</b> | 6        | 96                     | 89                  | >20:1           |

|    |            |    |       |    |       |
|----|------------|----|-------|----|-------|
| 7  | <b>L7</b>  | 8  | 82    | 53 | >20:1 |
| 8  | <b>L8</b>  | 8  | 78    | 44 | >20:1 |
| 9  | <b>L9</b>  | 5  | 65    | 30 | >20:1 |
| 10 | <b>L10</b> | 8  | 70    | 28 | >20:1 |
| 11 | <b>L11</b> | 24 | 60    | 20 | >20:1 |
| 12 | <b>L12</b> | 72 | trace | -  | -     |

<sup>a</sup>Reaction conditions: **1a** (26.5 mg, 0.1 mmol, 1.0 equiv), **2a** (16.8 mg, 0.15 mmol, 1.5 equiv), **L** (10 mol %, 0.10 equiv), AgOAc (1.6 mg, 10 mol %, 0.10 equiv), toluene (1.0 mL), rt. <sup>b</sup>Isolated yield. <sup>c</sup>Determined by chiral HPLC. <sup>d</sup>Diastereomeric ratio (dr) determined by <sup>1</sup>H NMR of crude reaction mixture.

**Table S3.** Solvent screening

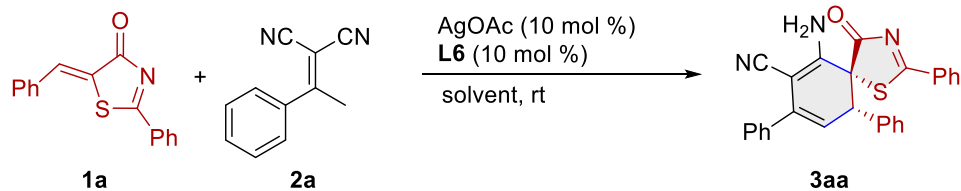

| Entry | Solvent                 | Time(h) | Yield <sup>b</sup> (%) | ee <sup>c</sup> (%) | dr <sup>d</sup> |
|-------|-------------------------|---------|------------------------|---------------------|-----------------|
| 1     | toluene                 | 6       | 96                     | 89                  | >20:1           |
| 2     | PhCF <sub>3</sub>       | 12      | 80                     | 83                  | >20:1           |
| 3     | PhCl                    | 18      | 95                     | 88                  | >20:1           |
| 4     | PhF                     | 22      | 79                     | 63                  | >20:1           |
| 5     | 1,4-dioxane             | 22      | 70                     | 38                  | >20:1           |
| 6     | <i>p</i> -xylene        | 24      | 60                     | 10                  | >20:1           |
| 7     | Et <sub>2</sub> O       | 18      | 85                     | 82                  | >20:1           |
| 8     | tert butyl methyl ether | 24      | 65                     | 56                  | >20:1           |
| 9     | THF                     | 18      | 70                     | 60                  | >20:1           |
| 10    | CH <sub>3</sub> CN      | 24      | 78                     | 38                  | >20:1           |
| 11    | EtOAc                   | 20      | 80                     | 79                  | >20:1           |
| 12    | DCM                     | 72      | trace                  | -                   | >20:1           |
| 13    | CCl <sub>4</sub>        | 20      | 88                     | 80                  | >20:1           |
| 14    | DCE                     | 18      | 78                     | 62                  | >20:1           |
| 15    | hexane                  | 20      | 95                     | 88                  | >20:1           |
| 16    | cyclohexane             | 22      | 78                     | 79                  | >20:1           |
| 17    | heptane                 | 20      | 80                     | 86                  | >20:1           |
| 18    | pentane                 | 20      | 82                     | 83                  | >20:1           |
| 19    | petroleum ether         | 22      | 96                     | 91                  | >20:1           |

<sup>a</sup>Reaction conditions: **1a** (26.5 mg, 0.1 mmol, 1.0 equiv), **2a** (16.8 mg, 0.15 mmol, 1.5 equiv), **L6** (11.7 mg, 10 mol %, 0.10 equiv), AgOAc (1.6 mg, 10 mol %, 0.10 equiv), solvent (1.0 mL), rt. <sup>b</sup>Isolated yield. <sup>c</sup>Determined by chiral HPLC. <sup>d</sup>Diastereomeric ratio (dr) determined by <sup>1</sup>H NMR of crude reaction mixture.

**Table S4.** Effect of temperature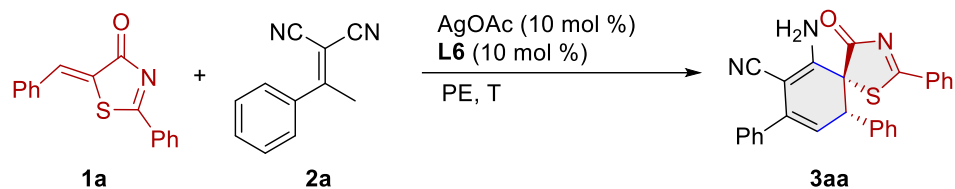

| Entry | T (°C) | Time (h) | Yield <sup>b</sup> (%) | ee <sup>c</sup> (%) | dr <sup>d</sup> |
|-------|--------|----------|------------------------|---------------------|-----------------|
| 1     | rt     | 22       | 96                     | 91                  | >20:1           |
| 2     | 0      | 30       | 90                     | 90                  | >20:1           |
| 3     | -10    | 35       | 88                     | 92                  | >20:1           |
| 4     | -20    | 45       | 80                     | 96                  | >20:1           |

<sup>a</sup>Reaction conditions: **1a** (26.5 mg, 0.1 mmol, 1.0 equiv), **2a** (16.8 mg, 0.15 mmol, 1.5 equiv), **L6** (11.7 mg, 10 mol %, 0.10 equiv), AgOAc (1.6 mg, 10 mol %, 0.10 equiv), Petroleum ether (PE) (1.0 mL). <sup>b</sup>Isolated yield. <sup>c</sup>Determined by chiral HPLC. <sup>d</sup>Diastereomeric ratio (dr) determined by <sup>1</sup>H NMR of the crude reaction mixture. PE: Petroleum ether

**Table S5.** Effect of catalyst loading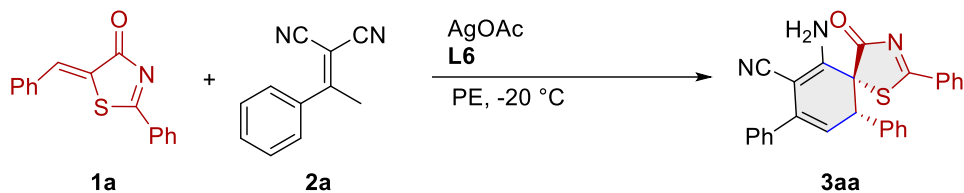

| Entry | Ag(OCOCF <sub>3</sub> ) (mol %) | L6 (mol %) | Time(h) | Yield <sup>b</sup> (%) | ee <sup>c</sup> (%) | dr <sup>d</sup> |
|-------|---------------------------------|------------|---------|------------------------|---------------------|-----------------|
| 1     | 10                              | 10         | 45      | 80                     | 96                  | >20:1           |
| 2     | 5                               | 5          | 72      | 90                     | 90                  | >20:1           |
| 3     | 2                               | 2          | 80      | 88                     | 92                  | >20:1           |

<sup>a</sup>Reaction conditions: **1a** (26.5 mg, 0.1 mmol, 1.0 equiv), **2a** (16.8 mg, 0.15 mmol, 1.5 equiv), **L6**, AgOAc, Petroleum ether (PE) (1.0 mL). <sup>b</sup>Isolated yield. <sup>c</sup>Determined by chiral HPLC. <sup>d</sup>Diastereomeric ratio (dr) determined by <sup>1</sup>H NMR of the crude reaction mixture. PE: Petroleum ether



### Characterization of annulated products 3:

#### (5*R*,10*S*)-6-amino-4-oxo-2,8,10-triphenyl-1-thia-3-azaspiro[4.5]deca-2,6,8-triene-7-carbonitrile (3aa):

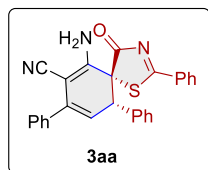

The compound was prepared following the synthetic procedure A. The desired product was isolated by flash column chromatography (15:85 = EtOAc/Hexanes, v/v) to afford a yellow solid (34.6 mg, 80% yield).  $[\alpha]_D^{20} = +62.8$  ( $c = 0.5$ ,  $\text{CHCl}_3$ ). **HPLC**: 96% ee, (IC, IPA/n-hexane = 30/70, flow rate = 1.0 mL/min,  $\lambda = 254$  nm),  $t_R = 24.95$  min (major), 32.44 min (minor). **mp**: 188-190 °C.  **$^1\text{H}$  NMR (400 MHz,  $\text{CDCl}_3$ )**  $\delta$  7.80 (d,  $J = 7.8$  Hz, 2H), 7.59 (t,  $J = 7.5$  Hz, 1H), 7.48 – 7.44 (m, 2H), 7.40 (dd,  $J = 7.6, 5.4$  Hz, 4H), 7.37 – 7.33 (m, 3H), 7.18 (dd,  $J = 5.0, 2.2$  Hz, 3H), 5.88 (d,  $J = 2.7$  Hz, 1H), 5.32 (s, 2H), 4.61 (d,  $J = 2.9$  Hz, 1H).  **$^{13}\text{C}\{^1\text{H}\}$  NMR (100 MHz,  $\text{CDCl}_3$ )**  $\delta$  197.2, 191.5, 155.0, 137.6, 137.3, 135.9, 135.5, 131.4, 130.3, 129.2, 128.9, 128.74, 128.68, 128.5, 128.3, 127.7, 120.9, 117.2, 83.5, 74.2, 50.4. **HRMS (ESI, m/z)**:  $[\text{M} + \text{Na}]^+$  calculated for  $\text{C}_{27}\text{H}_{19}\text{N}_3\text{NaOS}^+$ : 456.1142; found: 434.1144.

#### (5*R*,10*S*)-6-amino-4-oxo-2,8-diphenyl-10-(p-tolyl)-1-thia-3-azaspiro[4.5]deca-2,6,8-triene-7-carbonitrile (3ab):

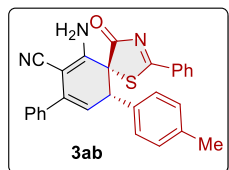

The compound was prepared following the synthetic procedure A. The desired product was isolated by flash column chromatography (15:85 = EtOAc/Hexanes, v/v) to afford a yellow semi-solid (31.3 mg, 70% yield).  $[\alpha]_D^{20} = +66.8$  ( $c = 0.5$ ,  $\text{CHCl}_3$ ). **mp**: 188-190 °C. **HPLC**: 92% ee, (IC, IPA/n-hexane = 30/70, flow rate = 1.0 mL/min,  $\lambda = 254$  nm),  $t_R = 28.82$  min (major), 37.62 min (minor).  **$^1\text{H}$  NMR (400 MHz,  $\text{CDCl}_3$ )**  $\delta$  7.99 (d,  $J = 7.6$  Hz, 2H), 7.76 (t,  $J = 7.5$  Hz, 1H), 7.62 – 7.50 (m, 7H), 7.41 – 7.34 (m, 2H), 7.14 (d,  $J = 7.8$  Hz, 2H), 6.01 (d,  $J = 2.8$  Hz, 1H), 5.41 (s, 2H), 4.71 (d,  $J = 2.9$  Hz, 1H), 2.34 (s, 3H).  **$^{13}\text{C}\{^1\text{H}\}$  NMR (100 MHz,  $\text{CDCl}_3$ )**  $\delta$  197.2, 191.5, 155.2, 138.2, 137.7, 137.2, 135.8, 132.4, 131.5, 130.1, 129.2, 129.0, 128.9, 128.6, 127.6, 121.2, 117.2, 83.3, 74.4, 49.9, 21.2. **HRMS (ESI, m/z)**:  $[\text{M} + \text{H}]^+$  calculated for  $\text{C}_{28}\text{H}_{22}\text{N}_3\text{OS}^+$ : 448.1479; found: 448.1465

#### (5*R*,10*S*)-6-amino-10-(4-fluorophenyl)-4-oxo-2,8-diphenyl-1-thia-3-azaspiro[4.5]deca-2,6,8-triene-7-carbonitrile (3ac):

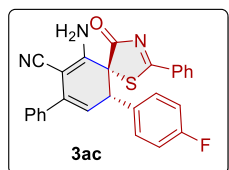

The compound was prepared following the synthetic procedure A. The desired product was isolated by flash column chromatography (15:85 = EtOAc/Hexanes, v/v) to afford a yellow solid (30.7 mg, 68% yield).

$[\alpha]_D^{20} = +49.3$  ( $c = 0.45$ ,  $\text{CHCl}_3$ ). **HPLC: 97% ee**, (IC, IPA/n-hexane = 30/70, flow rate = 1.0 mL/min,  $\lambda = 254$  nm),  $t_R = 19.05$  min (major), 31.51 min (minor). **mp:** 187-189 °C.  **$^1\text{H}$  NMR (500 MHz,  $\text{CDCl}_3$ )**  $\delta$  7.86 (d,  $J = 7.7$  Hz, 2H), 7.65 (t,  $J = 7.4$  Hz, 1H), 7.47 – 7.38 (m, 7H), 7.34 (dd,  $J = 8.7$ , 5.3 Hz, 2H), 6.89 (t,  $J = 8.7$  Hz, 2H), 5.83 (d,  $J = 2.9$  Hz, 1H), 5.15 (s, 2H), 4.59 (d,  $J = 2.8$  Hz, 1H).  **$^{13}\text{C}$  { $^1\text{H}$ } NMR (125 MHz,  $\text{CDCl}_3$ )**  $\delta$  197.3, 191.5,  $\delta$  162.70 (d,  $J = 247.8$  Hz), 154.9, 137.6, 137.5, 136.1, 131.96 (d,  $J = 8.3$  Hz), 129.3, 129.0, 128.7, 127.7, 120.6, 117.0, 115.34 (d,  $J = 21.1$  Hz), 83.8, 74.3, 49.6.  **$^{19}\text{F}$ { $^1\text{H}$ } NMR (471 MHz,  $\text{CDCl}_3$ )**  $\delta$  -113.05 **HRMS (ESI,  $m/z$ ):**  $[\text{M} + \text{H}]^+$  calculated for  $\text{C}_{27}\text{H}_{19}\text{FN}_3\text{OS}^+$ : 452.1228; found: 452.1234.

**(5*R*,10*S*)-6-amino-10-(4-chlorophenyl)-4-oxo-2,8-diphenyl-1-thia-3-azaspiro[4.5]deca-2,6,8-triene-7-carbonitrile (3ad):**

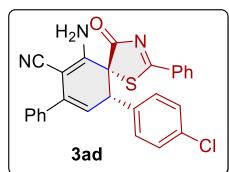

The compound was prepared following the synthetic procedure A. The desired product was isolated by flash column chromatography (15:85 = EtOAc/Hexanes, v/v) to afford a yellow solid (33.7 mg, 72% yield).  $[\alpha]_D^{20} = +46.4$  ( $c = 0.37$ ,  $\text{CHCl}_3$ ). **HPLC: 90% ee**, (IC, IPA/n-hexane = 30/70, flow rate = 1.0 mL/min,  $\lambda = 254$  nm),  $t_R = 18.11$  min (major), 29.84 min (minor). **mp:** 199-201 °C.  **$^1\text{H}$  NMR (500 MHz,  $\text{CDCl}_3$ )**  $\delta$  7.86 (dd,  $J = 8.4$ , 1.3 Hz, 2H), 7.68 – 7.60 (m, 1H), 7.48 – 7.36 (m, 7H), 7.30 (d,  $J = 6.6$  Hz, 2H), 7.17 (d,  $J = 8.5$  Hz, 2H), 5.80 (d,  $J = 2.9$  Hz, 1H), 5.26 (s, 2H), 4.58 (d,  $J = 2.8$  Hz, 1H).  **$^{13}\text{C}$  { $^1\text{H}$ } NMR (125 MHz,  $\text{CDCl}_3$ )**  $\delta$  197.3, 191.3, 155.0, 137.8, 137.5, 136.2, 134.5, 134.1, 131.6, 131.3, 129.3, 129.0, 128.8, 128.7, 128.6, 127.6, 120.1, 117.0, 83.4, 74.0, 49.6. **HRMS (ESI,  $m/z$ ):**  $[\text{M} + \text{H}]^+$  calculated for  $\text{C}_{27}\text{H}_{19}\text{ClN}_3\text{OS}^+$ : 468.0932; found: 468.0924.

**(5*R*,10*S*)-6-amino-10-(4-nitrophenyl)-4-oxo-2,8-diphenyl-1-thia-3-azaspiro[4.5]deca-2,6,8-triene-7-carbonitrile (3ae):**

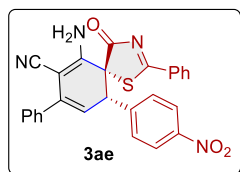

The compound was prepared following the synthetic procedure A. The desired product was isolated by flash column chromatography (20:80 = EtOAc/Hexanes, v/v) to afford a yellow solid (31.1 mg, 65% yield).  $[\alpha]_D^{20} = +45.2$  ( $c = 0.42$ ,  $\text{CHCl}_3$ ). **HPLC: 85% ee**, (IC, IPA/n-hexane = 30/70, flow rate = 1.0 mL/min,  $\lambda = 254$  nm),  $t_R = 36.81$  min (major), 65.58 min (minor). **mp:** 202-204 °C.  **$^1\text{H}$  NMR (400 MHz,  $\text{CDCl}_3$ )**  $\delta$  8.07 (d,  $J = 8.5$  Hz, 2H), 7.86 (d,  $J = 7.9$  Hz, 2H), 7.65 (d,  $J = 7.8$  Hz, 1H), 7.56 (d,  $J = 8.6$  Hz, 2H), 7.47 – 7.43 (m, 5H), 7.43 (s, 2H), 5.81 (d,  $J = 2.7$  Hz, 1H), 5.18 (s, 2H), 4.73 (d,  $J = 2.8$  Hz, 1H).  **$^{13}\text{C}$ { $^1\text{H}$ } NMR (100 MHz,  $\text{CDCl}_3$ )**  $\delta$  197.3, 190.9, 154.7, 147.9, 143.1, 138.4, 137.2, 136.6, 131.4, 131.0, 129.6, 129.5, 129.3, 129.1, 128.9, 128.8, 127.7, 123.5, 118.6, 116.7, 83.8, 73.7, 49.8. **HRMS (ESI,  $m/z$ ):**  $[\text{M} + \text{H}]^+$  calculated for  $\text{C}_{27}\text{H}_{19}\text{N}_4\text{O}_3\text{S}^+$ : 479.1173; found: 479.1171.

**(5R,10S)-6-amino-10-(naphthalen-2-yl)-4-oxo-2,8-diphenyl-1-thia-3-azaspiro[4.5]deca-2,6,8-triene-7-carbonitrile (3af):**

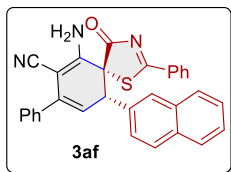

The compound was prepared following the synthetic procedure A. The desired product was isolated by flash column chromatography (15:85 = EtOAc/Hexanes, v/v) to afford a yellow solid (33.8 mg, 70% yield).  $[\alpha]_D^{20} = +66.9$  ( $c = 0.62$ ,  $\text{CHCl}_3$ ). **HPLC: 82% ee**, (IC, IPA/n-hexane = 30/70, flow rate = 1.0 mL/min,  $\lambda = 254$  nm),  $t_R = 31.41$  min (major), 39.46 min (minor). **mp:** 199-201 °C.  **$^1\text{H NMR}$  (400 MHz,  $\text{CDCl}_3$ )**  $\delta$  7.86 – 7.77 (m, 3H), 7.76 – 7.67 (m, 3H), 7.55 (d,  $J = 7.4$  Hz, 1H), 7.53 – 7.46 (m, 3H), 7.46 – 7.38 (m, 5H), 7.35 (t,  $J = 7.8$  Hz, 2H), 6.00 (d,  $J = 2.9$  Hz, 1H), 5.17 (s, 2H), 4.79 (d,  $J = 2.9$  Hz, 1H).  **$^{13}\text{C}\{^1\text{H}\}$  NMR (100 MHz,  $\text{CDCl}_3$ )**  $\delta$  197.2, 191.4, 155.1, 137.6, 137.4, 135.9, 133.2, 133.1, 133.0, 131.4, 129.9, 129.1, 128.9, 128.8, 128.7, 128.2, 128.0, 127.8, 127.7, 127.6, 126.4, 126.3, 121.1, 117.1, 83.8, 74.4, 50.2. **HRMS (ESI, m/z):**  $[\text{M} + \text{H}]^+$  calculated for  $\text{C}_{31}\text{H}_{22}\text{N}_3\text{OS}^+$ : 484.1479; found: 484.1478

**(5R,10S)-6-amino-4-oxo-2,8-diphenyl-10-(thiophen-2-yl)-1-thia-3-azaspiro[4.5]deca-2,6,8-triene-7-carbonitrile (3ag):**

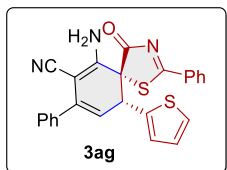

The compound was prepared following the synthetic procedure A. The desired product was isolated by flash column chromatography (15:85 = EtOAc/Hexanes, v/v) to afford a yellow solid (31.6 mg, 72% yield).  $[\alpha]_D^{20} = +60.6$  ( $c = 0.47$ ,  $\text{CHCl}_3$ ). **HPLC: 73% ee**, (IB, IPA/n-hexane = 30/75, flow rate = 1.0 mL/min,  $\lambda = 254$  nm),  $t_R = 10.23$  min (major), 15.56 min (minor). **mp:** 191-193 °C.  **$^1\text{H NMR}$  (500 MHz,  $\text{CDCl}_3$ )**  $\delta$  7.97 – 7.90 (m, 2H), 7.66 (dd,  $J = 8.2, 6.7$  Hz, 1H), 7.49 – 7.44 (m, 4H), 7.43 – 7.38 (m, 3H), 7.12 (dd,  $J = 5.1, 1.3$  Hz, 1H), 7.06 (dd,  $J = 3.6, 1.2$  Hz, 1H), 6.86 (dd,  $J = 5.2, 3.5$  Hz, 1H), 5.87 (d,  $J = 2.9$  Hz, 1H), 5.19 (s, 2H), 4.94 (d,  $J = 2.9$  Hz, 1H).  **$^{13}\text{C}\{^1\text{H}\}$  NMR (125 MHz,  $\text{CDCl}_3$ )**  $\delta$  197.8, 191.3, 155.4, 137.6, 137.5, 137.3, 136.1, 131.6, 129.3, 129.1, 128.9, 128.7, 127.7, 126.7, 126.1, 121.6, 116.9, 83.6, 74.4, 46.1. **HRMS (ESI, m/z):**  $[\text{M} + \text{H}]^+$  calculated for  $\text{C}_{25}\text{H}_{18}\text{N}_3\text{OS}_2^+$ : 440.0886; found: 440.0868

**(5R,10S)-6-amino-2-(4-chlorophenyl)-4-oxo-8,10-diphenyl-1-thia-3-azaspiro[4.5]deca-2,6,8-triene-7-carbonitrile (3ah):**

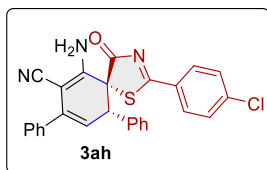

The compound was prepared following the synthetic procedure A. The desired product was isolated by flash column chromatography (15:85 = EtOAc/Hexanes, v/v) to afford a yellow semi-solid (31.8 mg, 68% yield).  $[\alpha]_D^{20} = +45.3$  ( $c = 0.37$ ,  $\text{CHCl}_3$ ). **HPLC: 96% ee**, (IC, IPA/n-hexane = 30/70, flow rate = 1.0 mL/min,  $\lambda = 254$  nm),  $t_R = 22.98$  min (major), 30.93 min (minor). **mp:** 197-199 °C.  **$^1\text{H NMR}$  (500 MHz,**

$\text{CDCl}_3$ )  $\delta$  7.74 (d,  $J = 8.7$  Hz, 2H), 7.47 – 7.41 (m, 4H), 7.40 – 7.35 (m, 4H), 7.35 – 7.31 (m, 2H), 7.18 (dd,  $J = 5.1, 2.0$  Hz, 2H), 5.88 (d,  $J = 2.8$  Hz, 1H), 5.29 (s, 2H), 4.58 (d,  $J = 2.8$  Hz, 1H).  $^{13}\text{C}\{^1\text{H}\}$  NMR (125 MHz,  $\text{CDCl}_3$ )  $\delta$  195.7, 191.3, 154.8, 142.6, 137.6, 137.4, 135.3, 130.2, 130.0, 129.7, 129.6, 128.74, 128.66, 128.6, 128.3, 127.6, 120.7, 117.1, 83.4, 74.6, 50.5. HRMS (ESI,  $m/z$ ):  $[\text{M} + \text{H}]^+$  calculated for  $\text{C}_{27}\text{H}_{19}\text{ClN}_3\text{OS}^+$ : 468.0932; found: 468.0922.

**(5R,10S)-6-amino-4-oxo-2,10-diphenyl-8-(p-tolyl)-1-thia-3-azaspiro[4.5]deca-2,6,8-triene-7-carbonitrile (3ai):**

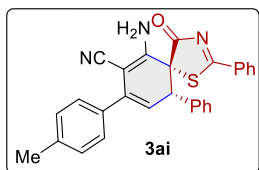

The compound was prepared following the synthetic procedure A. The desired product was isolated by flash column chromatography (15:85 = EtOAc/Hexanes, v/v) to afford a yellow solid (34.8 mg, 78% yield).  $[\alpha]_{\text{D}}^{20} = +44.0$  ( $c = 0.40$ ,  $\text{CHCl}_3$ ). HPLC: 95% ee, (IC, IPA/n-hexane = 70/30, flow rate = 1.0 mL/min,  $\lambda = 254$  nm),  $t_{\text{R}} = 23.41$  min (major), 30.80 min (minor). mp: 195–197 °C.  $^1\text{H}$  NMR (400 MHz,  $\text{CDCl}_3$ )  $\delta$  7.81 (d,  $J = 7.9$  Hz, 2H), 7.59 (t,  $J = 7.4$  Hz, 1H), 7.44 – 7.32 (m, 6H), 7.25 – 7.14 (m, 5H), 5.85 (d,  $J = 3.0$  Hz, 1H), 5.28 (s, 2H), 4.59 (d,  $J = 2.9$  Hz, 1H), 2.39 (s, 3H).  $^{13}\text{C}\{^1\text{H}\}$  NMR (100 MHz,  $\text{CDCl}_3$ )  $\delta$  197.2, 191.6, 155.0, 138.6, 137.2, 135.8, 135.6, 134.8, 131.4, 130.3, 129.3, 129.1, 128.8, 128.5, 128.3, 127.5, 120.1, 117.3, 83.5, 74.3, 50.4, 21.4. HRMS (ESI,  $m/z$ ):  $[\text{M} + \text{H}]^+$  calculated for  $\text{C}_{28}\text{H}_{22}\text{N}_3\text{OS}^+$ : 448.1479; found: 448.1479.

**(5R,10S)-6-amino-8-(4-methoxyphenyl)-4-oxo-2,10-diphenyl-1-thia-3-azaspiro[4.5]deca-2,6,8-triene-7-carbonitrile (3aj):**

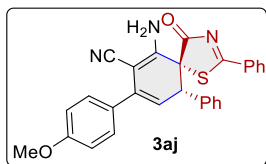

The compound was prepared following the synthetic procedure A. The desired product was isolated by flash column chromatography (20:80 = EtOAc/Hexanes, v/v) to afford a yellow solid (33.3mg, 72% yield).  $[\alpha]_{\text{D}}^{20} = +46.4$  ( $c = 0.37$ ,  $\text{CHCl}_3$ ). HPLC: 92% ee, (IC, IPA/n-hexane = 30/70, flow rate = 1.0 mL/min,  $\lambda = 254$  nm),  $t_{\text{R}} = 31.71$  min (minor), 45.78 min (major). mp: 193–195 °C.  $^1\text{H}$  NMR (400 MHz,  $\text{CDCl}_3$ )  $\delta$  7.91 – 7.84 (m, 2H), 7.63 (t,  $J = 7.4$  Hz, 1H), 7.47 – 7.37 (m, 8H), 7.28 (s, 1H), 6.72 (d,  $J = 8.6$  Hz, 2H), 5.87 (d,  $J = 3.1$  Hz, 1H), 5.12 (s, 2H), 4.56 (d,  $J = 2.8$  Hz, 1H), 3.68 (s, 3H).  $^{13}\text{C}\{^1\text{H}\}$  NMR (100 MHz,  $\text{CDCl}_3$ )  $\delta$  197.3, 191.7, 159.6, 155.1, 137.7, 137.2, 135.9, 131.5, 131.4, 129.2, 129.0, 128.7, 127.7, 127.5, 121.5, 117.1, 113.7, 83.7, 74.5, 55.3, 49.6. HRMS (ESI,  $m/z$ ):  $[\text{M} + \text{H}]^+$  calculated for  $\text{C}_{28}\text{H}_{22}\text{N}_3\text{O}_2\text{S}^+$ : 464.1428; found: 464.1421

**(5R,10S)-6-amino-8-(4-fluorophenyl)-4-oxo-2,10-diphenyl-1-thia-3-azaspiro[4.5]deca-2,6,8-triene-7-carbonitrile (3ak):**

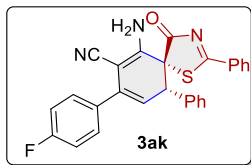

The compound was prepared following the synthetic procedure A. The desired product was isolated by flash column chromatography (8:92 = EtOAc/Hexanes, v/v) to afford a yellow solid (29.3 mg, 65% yield).  $[\alpha]_D^{20} = +48.0$  ( $c = 0.32$ ,  $\text{CHCl}_3$ ). **HPLC**: 95% ee, (IC, IPA/n-hexane = 70/30, flow rate = 1.0 mL/min,  $\lambda = 254$  nm),  $t_R = 19.11$  min (major), 25.01 min (minor). **mp**: 190-192 °C.  **$^1\text{H}$  NMR (400 MHz,  $\text{CDCl}_3$ )**  $\delta$  7.86 – 7.80 (m, 2H), 7.64 – 7.59 (m, 1H), 7.45 – 7.38 (m, 4H), 7.35 (dd,  $J = 7.6, 2.0$  Hz, 2H), 7.22 – 7.16 (m, 3H), 7.10 (t,  $J = 8.6$  Hz, 2H), 5.85 (d,  $J = 2.8$  Hz, 1H), 5.19 (s, 2H), 4.59 (d,  $J = 2.8$  Hz, 1H).  **$^{13}\text{C}\{^1\text{H}\}$  NMR (100 MHz,  $\text{CDCl}_3$ )**  $\delta$  197.1, 191.4,  $\delta$  163.13 (d,  $J = 247.9$  Hz), 155.1, 136.4, 135.9, 135.4, 133.7, 130.3, 129.49 (d,  $J = 8.4$  Hz), 129.2, 128.9, 128.6, 128.4, 120.8, 115.68 (d,  $J = 21.8$  Hz), 83.5, 74.1, 50.4.  **$^{19}\text{F}\{^1\text{H}\}$  NMR (471 MHz,  $\text{CDCl}_3$ )**  $\delta$  -112.9. **HRMS (ESI, m/z)**:  $[\text{M} + \text{H}]^+$  calculated for  $\text{C}_{27}\text{H}_{19}\text{FN}_3\text{OS}^+$ : 452.1228; found: 452.1229.

**(5R,10S)-6-amino-8-(4-bromophenyl)-4-oxo-2,10-diphenyl-1-thia-3-azaspiro[4.5]deca-2,6,8-triene-7-carbonitrile (3al):**

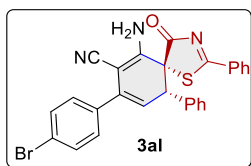

The compound was prepared following the synthetic procedure A. The desired product was isolated by flash column chromatography (15:85 = EtOAc/Hexanes, v/v) to afford a yellow solid (35.8 mg, 70% yield).  $[\alpha]_D^{20} = +44.0$  ( $c = 0.45$ ,  $\text{CHCl}_3$ ). **HPLC**: 93% ee, (IB, IPA/n-hexane = 30/70, flow rate = 0.9 mL/min,  $\lambda = 254$  nm),  $t_R = 22.57$  min (major), 30.28 min (minor). **mp**: 199-201 °C.  **$^1\text{H}$  NMR (500 MHz,  $\text{CDCl}_3$ )**  $\delta$  7.91 – 7.80 (m, 2H), 7.64 (t,  $J = 7.5$  Hz, 1H), 7.55 (d,  $J = 8.4$  Hz, 2H), 7.43 (t,  $J = 7.9$  Hz, 2H), 7.36 – 7.30 (m, 4H), 7.20 (dd,  $J = 5.1, 2.0$  Hz, 3H), 5.89 (d,  $J = 2.8$  Hz, 1H), 5.10 (s, 2H), 4.58 (d,  $J = 2.8$  Hz, 1H).  **$^{13}\text{C}\{^1\text{H}\}$  NMR (125 MHz,  $\text{CDCl}_3$ )**  $\delta$  197.3, 191.2, 154.9, 137.8, 137.4, 137.1, 136.2, 134.6, 132.7, 132.0, 131.9, 131.5, 131.3, 129.4, 129.3, 129.1, 129.0, 128.8, 128.7, 127.6, 122.7, 120.0, 116.9, 83.6, 76.9, 74.0, 49.6. **HRMS (ESI, m/z)**:  $[\text{M} + \text{H}]^+$  calculated for  $\text{C}_{27}\text{H}_{19}\text{BrN}_3\text{OS}^+$ : 512.0427, 514.0407 found: 512.0419, 514.0400

**(5R,10S)-6-amino-8-(2-chlorophenyl)-4-oxo-2,10-diphenyl-1-thia-3-azaspiro[4.5]deca-2,6,8-triene-7-carbonitrile (3am):**

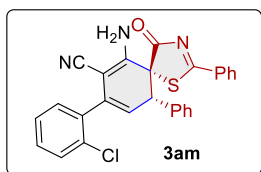

The compound was prepared following the synthetic procedure A. The desired product was isolated by flash column chromatography (15:85 = EtOAc/Hexanes, v/v) to afford a yellow solid (37.4 mg, 80% yield).  $[\alpha]_D^{20} = +61.3$  ( $c = 0.67$ ,  $\text{CHCl}_3$ ). **HPLC**: 91% ee, (IC, IPA/n-hexane = 10/90, flow rate = 1.0 mL/min,  $\lambda = 254$  nm),  $t_R = 22.88$  min (minor), 32.44 min (major). **mp**: 191-193 °C.  **$^1\text{H}$  NMR (500 MHz,  $\text{CDCl}_3$ )**  $\delta$

7.88 – 7.78 (m, 2H), 7.62 – 7.56 (m, 1H), 7.47 (dt,  $J = 7.4, 1.2$  Hz, 1H), 7.43 – 7.36 (m, 2H), 7.37 – 7.28 (m, 5H), 7.23 – 7.11 (m, 3H), 5.77 (d,  $J = 2.7$  Hz, 1H), 5.19 (s, 2H), 4.62 (d,  $J = 2.7$  Hz, 1H).  $^{13}\text{C}\{^1\text{H}\}$  NMR (125 MHz,  $\text{CDCl}_3$ )  $\delta$  197.4, 191.6, 153.4, 137.0, 135.8, 135.3, 133.5, 131.5, 130.9, 130.3, 130.0, 129.9, 129.1, 128.9, 128.5, 128.3, 127.1, 122.3, 116.4, 84.8, 74.2, 50.1 HRMS (ESI,  $m/z$ ):  $[\text{M} + \text{H}]^+$  calculated for  $\text{C}_{27}\text{H}_{19}\text{ClN}_3\text{OS}^+$ : 468.0932; found: 468.0941

**(5R,10S)-6-amino-8-(furan-2-yl)-4-oxo-2,10-diphenyl-1-thia-3-azaspiro[4.5]deca-2,6,8-triene-7-carbonitrile (3an):**

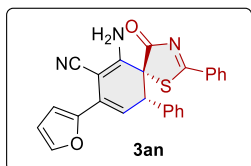

The compound was prepared following the synthetic procedure A. The desired product was isolated by flash column chromatography (8:92 = EtOAc/Hexanes, v/v) to afford a yellow solid (33.0 mg, 78% yield).  $[\alpha]_{\text{D}}^{20} = +44.5$  ( $c = 0.40$ ,  $\text{CHCl}_3$ ). HPLC: 74% ee, (ID, IPA/n-hexane = 30/70, flow rate = 1.0 mL/min,  $\lambda = 254$  nm),  $t_{\text{R}} = 18.50$  min (minor), 24.03 min (major). mp: 197-199 °C.  $^1\text{H}$  NMR (400 MHz,  $\text{CDCl}_3$ )  $\delta$  7.84 – 7.74 (m, 2H), 7.59 (t,  $J = 7.5$  Hz, 1H), 7.44 – 7.31 (m, 5H), 7.24 – 7.14 (m, 3H), 6.89 (d,  $J = 3.5$  Hz, 1H), 6.47 (dd,  $J = 3.5, 1.8$  Hz, 1H), 6.25 (d,  $J = 3.1$  Hz, 1H), 5.31 (s, 2H), 4.58 (d,  $J = 3.1$  Hz, 1H).  $^{13}\text{C}\{^1\text{H}\}$  NMR (100 MHz,  $\text{CDCl}_3$ )  $\delta$  197.3, 191.3, 155.6, 149.9, 142.6, 135.9, 135.3, 131.3, 130.3, 129.2, 128.8, 128.5, 128.3, 126.1, 117.7, 117.4, 111.7, 108.5, 80.0, 73.9, 49.9. HRMS (ESI,  $m/z$ ):  $[\text{M} + \text{H}]^+$  calculated for  $\text{C}_{25}\text{H}_{18}\text{N}_3\text{O}_2\text{S}^+$ : 424.1115 found: 424.1115.

**(5R,10S)-6-amino-4-oxo-2,10-diphenyl-8-(thiophen-2-yl)-1-thia-3-azaspiro[4.5]deca-2,6,8-triene-7-carbonitrile (3ao):**

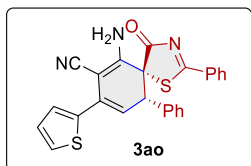

The compound was prepared following the synthetic procedure A. The desired product was isolated by flash column chromatography (8:92 = EtOAc/Hexanes, v/v) to afford a yellow solid (31.6 mg, 72% yield).  $[\alpha]_{\text{D}}^{20} = +52.8$  ( $c = 0.5$ ,  $\text{CHCl}_3$ ). HPLC: 80% ee, (IC, IPA/n-hexane = 30/70, flow rate = 1.0 mL/min,  $\lambda = 254$  nm),  $t_{\text{R}} = 20.78$  min (minor), 28.16 min (major). mp: 197-199 °C.  $^1\text{H}$  NMR (400 MHz,  $\text{CDCl}_3$ )  $\delta$  7.84 – 7.78 (m, 2H), 7.60 (t,  $J = 7.5$  Hz, 1H), 7.40 (d,  $J = 8.0$  Hz, 2H), 7.39 – 7.33 (m, 3H), 7.27 (d,  $J = 5.9$  Hz, 1H), 7.23 – 7.16 (m, 3H), 7.08 (dd,  $J = 5.4, 3.7$  Hz, 1H), 6.00 (d,  $J = 3.1$  Hz, 1H), 5.34 (s, 2H), 4.58 (d,  $J = 3.1$  Hz, 1H).  $^{13}\text{C}\{^1\text{H}\}$  NMR (100 MHz,  $\text{CDCl}_3$ )  $\delta$  197.2, 191.2, 155.6, 139.8, 135.9, 135.2, 131.3, 130.3, 130.2, 129.2, 128.9, 128.6, 128.3, 127.9, 126.2, 125.5, 120.2, 117.2, 82.5, 73.9, 50.2. HRMS (ESI,  $m/z$ ):  $[\text{M} + \text{H}]^+$  calculated for  $\text{C}_{25}\text{H}_{18}\text{N}_3\text{OS}_2^+$ : 440.0886 found: 440.0887.

**(5R,10S)-6-amino-8-(benzo[d][1,3]dioxol-5-yl)-4-oxo-2,10-diphenyl-1-thia-3-azaspiro[4.5]deca-2,6,8-triene-7-carbonitrile (3ap):**

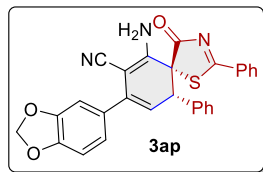

The compound was prepared following the synthetic procedure A. The desired product was isolated by flash column chromatography (20:80 = EtOAc/Hexanes, v/v) to afford a yellow solid (33.4 mg, 70% yield).  $[\alpha]_D^{20} = +49.7$  ( $c = 0.45$ ,  $\text{CHCl}_3$ ). **HPLC**: 80% ee, (IC, IPA/n-hexane = 30/70, flow rate = 1 mL/min,  $\lambda = 254$  nm),  $t_R = 34.76$  min (minor), 52.22 min (major). **mp**: 195-197 °C.  **$^1\text{H NMR}$  (400 MHz,  $\text{CDCl}_3$ )**  $\delta$  7.86 – 7.81 (m, 2H), 7.62 (t,  $J = 7.5$  Hz, 1H), 7.42 (t,  $J = 7.8$  Hz, 2H), 7.38 – 7.31 (m, 2H), 7.19 (dd,  $J = 5.0, 2.1$  Hz, 3H), 6.96 – 6.90 (m, 2H), 6.84 (d,  $J = 8.0$  Hz, 1H), 6.00 (d,  $J = 1.6$  Hz, 2H), 5.82 (d,  $J = 2.9$  Hz, 1H), 5.12 (s, 2H), 4.57 (d,  $J = 2.9$  Hz, 1H).  **$^{13}\text{C}\{^1\text{H}\}$  NMR (100 MHz,  $\text{CDCl}_3$ )**  $\delta$  197.2, 191.5, 154.9, 148.2, 147.9, 137.0, 135.9, 135.5, 131.8, 131.5, 130.3, 129.2, 128.9, 128.5, 128.3, 121.5, 120.2, 117.1, 108.5, 108.3, 101.5, 83.9, 74.3, 50.3. **HRMS (ESI, m/z)**:  $[\text{M} + \text{H}]^+$  calculated for  $\text{C}_{28}\text{H}_{20}\text{N}_3\text{O}_3\text{S}^+$ : 478.1220 found: 478.1216.

**(5R,10R)-6-amino-9-methyl-4-oxo-2,8,10-triphenyl-1-thia-3-azaspiro[4.5]deca-2,6,8-triene-7-carbonitrile (3aq):**

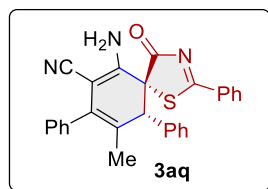

The compound was prepared following the synthetic procedure A. The desired product was isolated by flash column chromatography (15:85 = EtOAc/Hexanes, v/v) to afford a yellow solid (31.3 mg, 70% yield).  $[\alpha]_D^{20} = -71.6$  ( $c = 0.65$ ,  $\text{CHCl}_3$ ). **HPLC**: 74% ee (IC, IPA/n-hexane = 30/70, flow rate = 1.0 mL/min,  $\lambda = 254$  nm),  $t_R = 18.76$  min (minor), 43.86 min (major). **mp**: 191-193 °C.  **$^1\text{H NMR}$  (400 MHz,  $\text{CDCl}_3$ )**  $\delta$  7.99 (d,  $J = 7.5$  Hz, 2H), 7.68 (t,  $J = 7.5$  Hz, 1H), 7.49 (t,  $J = 7.7$  Hz, 2H), 7.44 – 7.33 (m, 6H), 7.30 (d,  $J = 7.7$  Hz, 2H), 7.25 (d,  $J = 3.6$  Hz, 2H), 4.94 (s, 2H), 4.07 (s, 1H), 1.51 (s, 3H).  **$^{13}\text{C}\{^1\text{H}\}$  NMR (100 MHz,  $\text{CDCl}_3$ )**  $\delta$  194.9, 189.7, 150.8, 138.2, 136.9, 135.9, 131.6, 130.0, 129.9, 129.4, 129.3, 129.1, 129.0, 128.6, 127.9, 125.6, 124.8, 117.6, 86.0, 73.2, 55.0, 19.1. **HRMS (ESI, m/z)**:  $[\text{M} + \text{H}]^+$  calculated for  $\text{C}_{28}\text{H}_{22}\text{N}_3\text{OS}^+$ : 448.1479 found: 448.1475.

**(5R,10R)-6-amino-4-oxo-2,8,9,10-tetraphenyl-1-thia-3-azaspiro[4.5]deca-2,6,8-triene-7-carbonitrile (3ar):**

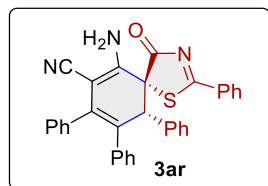

The compound was prepared following the synthetic procedure A. The desired product was isolated by flash column chromatography (15:85 = EtOAc/Hexanes, v/v) to afford a yellow solid (39.8 mg, 78% yield).



$[\alpha]_D^{20} = -72.0$  ( $c = 0.57$ ,  $\text{CHCl}_3$ ). **HPLC**: **66% ee** (IC, IPA/n-hexane = 30/70, flow rate = 1.0 mL/min,  $\lambda = 254$  nm),  $t_R = 14.63$  min (minor), 32.38 min (major). **mp**: 199-201 °C.  **$^1\text{H NMR}$  (500 MHz,  $\text{CDCl}_3$ )**  $\delta$  8.00 (d,  $J = 7.7$  Hz, 2H), 7.68 (t,  $J = 7.5$  Hz, 1H), 7.49 (t,  $J = 7.8$  Hz, 2H), 7.25 (d,  $J = 1.9$  Hz, 2H), 7.19 (d,  $J = 4.6$  Hz, 4H), 7.16 (t,  $J = 5.2$  Hz, 4H), 6.90 (t,  $J = 3.0$  Hz, 3H), 6.72 – 6.61 (m, 2H), 5.18 (s, 2H), 4.43 (s, 1H).  **$^{13}\text{C}\{^1\text{H}\}$  NMR (125 MHz,  $\text{CDCl}_3$ )**  $\delta$  194.2, 188.9, 152.4, 139.5, 137.9, 136.9, 136.0, 132.4, 131.5, 130.5, 130.2, 129.7, 129.3, 129.1, 129.0, 128.4, 128.3, 128.1, 127.7, 127.6, 126.3, 117.6, 86.1, 73.4, 55.0. **HRMS (ESI,  $m/z$ )**:  $[\text{M} + \text{H}]^+$  calculated for  $\text{C}_{33}\text{H}_{24}\text{N}_3\text{OS}^+$ : 510.1635 found: 510.1635.

**(1*R*,2*R*)-3-amino-4'-oxo-1,2'-diphenyl-9,10-dihydro-1*H*,4'*H*-spiro[phenanthrene-2,5'-thiazole]-4-carbonitrile (3as):**

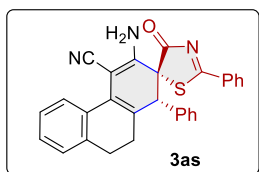

The compound was prepared following the synthetic procedure A. The desired product was isolated by flash column chromatography (15:85 = EtOAc/Hexanes, v/v) to afford a yellow solid (36.7 mg, 80% yield).  $[\alpha]_D^{20} = +42.5$  ( $c = 0.47$ ,  $\text{CHCl}_3$ ). **HPLC**: **81% ee** (IC, IPA/n-hexane = 30/70, flow rate = 1.0 mL/min,  $\lambda = 254$  nm),  $t_R = 21.04$  min (minor), 41.82 min (major). **mp**: 201-203 °C.  **$^1\text{H NMR}$  (400 MHz,  $\text{CDCl}_3$ )**  $\delta$  7.90 – 7.82 (m, 2H), 7.73 – 7.59 (m, 2H), 7.43 (t,  $J = 7.8$  Hz, 2H), 7.36 – 7.26 (m, 3H), 7.25 – 7.15 (m, 5H), 5.11 (s, 2H), 4.57 (d,  $J = 3.1$  Hz, 1H), 2.73 – 2.56 (m, 2H), 2.28 (dddd,  $J = 17.7, 14.4, 6.1, 3.5$  Hz, 1H), 1.98 – 1.86 (m, 1H).  **$^{13}\text{C}\{^1\text{H}\}$  NMR (100 MHz,  $\text{CDCl}_3$ )**  $\delta$  196.7, 190.7, 154.0, 136.7, 135.9, 133.6, 132.2, 131.5, 130.8, 130.5, 129.2, 128.9, 128.7, 128.3, 127.7, 127.5, 127.2, 126.7, 124.6, 117.9, 81.8, 73.6, 54.5, 29.1, 27.3. **HRMS (ESI,  $m/z$ )**:  $[\text{M} + \text{H}]^+$  calculated for  $\text{C}_{29}\text{H}_{22}\text{N}_3\text{OS}^+$ : 460.1479 found: 460.1479.

**(7*R*,8*R*)-9-amino-4'-oxo-2',7'-diphenyl-4'*H*,6*H*,7*H*-spiro[benzo[*c*]thiochromene-8,5'-thiazole]-10-carbonitrile (3at):**

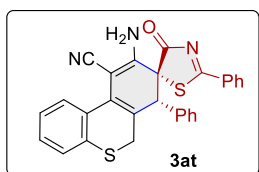

The compound was prepared following the synthetic procedure A. The desired product was isolated by flash column chromatography (20:80 = EtOAc/Hexanes, v/v) to afford a yellow solid (39.2 mg, 82% yield).  $[\alpha]_D^{20} = +77.7$  ( $c = 0.60$ ,  $\text{CHCl}_3$ ). **HPLC**: **69% ee** (IC, IPA/n-hexane = 30/70, flow rate = 1.0 mL/min,  $\lambda = 254$  nm),  $t_R = 24.18$  min (minor), 37.83 min (major). **mp**: 200-201 °C.  **$^1\text{H NMR}$  (400 MHz,  $\text{CDCl}_3$ )**  $\delta$  7.86 (d,  $J = 7.7$  Hz, 2H), 7.64 (dd,  $J = 10.9, 7.4$  Hz, 2H), 7.44 (t,  $J = 7.8$  Hz, 2H), 7.38 (d,  $J = 7.6$  Hz, 1H), 7.31 – 7.26 (m, 3H), 7.24 – 7.16 (m, 4H), 5.28 (s, 2H), 4.70 (d,  $J = 3.0$  Hz, 1H), 3.45 (dd,  $J = 15.8, 3.1$  Hz, 1H), 2.82 (d,  $J = 15.8$  Hz, 1H).  **$^{13}\text{C}\{^1\text{H}\}$  NMR (100 MHz,  $\text{CDCl}_3$ )**  $\delta$  196.4, 190.3, 154.6, 136.0, 134.0, 132.8, 132.0, 131.3, 130.8, 129.4, 129.3, 129.0, 128.9, 128.6, 128.4, 128.3, 126.9, 126.1, 126.0, 117.6, 82.1, 73.1, 54.1, 28.8. **HRMS (ESI,  $m/z$ )**:  $[\text{M} + \text{H}]^+$  calculated for  $\text{C}_{28}\text{H}_{20}\text{N}_3\text{OS}_2^+$ : 478.1043 found: 478.1035.



**(1*R*,2*R*)-3-amino-4'-oxo-1,2'-diphenyl-1,9-dihydro-4'H-spiro[fluorene-2,5'-thiazole]-4-carbonitrile (3au):**

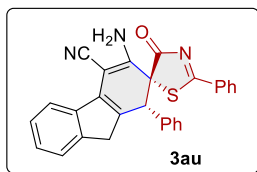

The compound was prepared following the synthetic procedure A. The desired product was isolated by flash column chromatography (15:85 = EtOAc/Hexanes, v/v) to afford a yellow solid (30.3 mg, 68% yield).  $[\alpha]_D^{20} = +74.1$  ( $c = 0.57$ ,  $\text{CHCl}_3$ ). **HPLC: 84% ee** (IC, IPA/n-hexane = 30/70, flow rate = 1.0 mL/min,  $\lambda = 254$  nm),  $t_R = 14.96$  min (minor), 28.95 min (major). **mp:** 198-200 °C.  **$^1\text{H NMR}$  (500 MHz,  $\text{CDCl}_3$ )**  $\delta$  8.01 (d,  $J = 7.7$  Hz, 1H), 7.85 (dd,  $J = 8.4, 1.3$  Hz, 2H), 7.65 – 7.60 (m, 1H), 7.46 – 7.34 (m, 7H), 7.25 – 7.22 (m, 3H), 5.06 (s, 2H), 4.76 (d,  $J = 2.1$  Hz, 1H), 3.59 (dd,  $J = 24.0, 2.1$  Hz, 1H), 3.10 (dd,  $J = 24.1, 2.2$  Hz, 1H).  **$^{13}\text{C}\{^1\text{H}\}$  NMR (125 MHz,  $\text{CDCl}_3$ )**  $\delta$  197.1, 190.9, 154.0, 143.4, 140.7, 135.9, 134.2, 133.8, 132.8, 131.4, 130.8, 130.7, 129.4, 129.2, 129.0, 128.9, 128.8, 128.3, 126.9, 125.6, 123.9, 119.7, 116.9, 79.6, 75.0, 51.9, 38.8. **HRMS (ESI,  $m/z$ ):**  $[\text{M} + \text{H}]^+$  calculated for  $\text{C}_{28}\text{H}_{20}\text{N}_3\text{OS}^+$ : 446.1322 found 446.1333.

**2-((8*S*,9*S*,10*R*,13*S*,14*S*,17*S*)-17-((5*R*,10*S*)-6-amino-7-cyano-4-oxo-2,10-diphenyl-1-thia-3-azaspiro[4.5]deca-2,6,8-trien-8-yl)-10,13-dimethyl-1,2,6,7,8,9,10,11,12,13,14,15,16,17-tetradecahydro-3*H*-cyclopenta[*a*]phenanthren-3-ylidene)malononitrile (3av):**

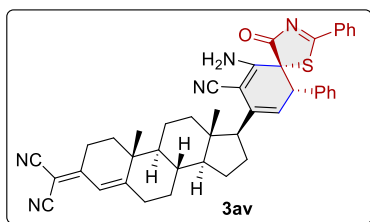

The compound was prepared following the synthetic procedure A. The desired product was isolated by flash column chromatography (20:80 = EtOAc/Hexanes, v/v) to afford a yellow solid (45.9 mg, 68% yield).  $[\alpha]_D^{20} = +55.2$  ( $c = 0.50$ ,  $\text{CHCl}_3$ ). **mp:** 199-201 °C.  **$^1\text{H NMR}$  (400 MHz,  $\text{CDCl}_3$ )**  $\delta$  7.80 (d,  $J = 7.8$  Hz, 2H), 7.58 (d,  $J = 7.5$  Hz, 1H), 7.39 (t,  $J = 7.7$  Hz, 2H), 7.31 – 7.26 (m, 2H), 7.19 (dd,  $J = 10.4, 5.0$  Hz, 3H), 6.47 (s, 1H), 5.62 (d,  $J = 2.5$  Hz, 1H), 5.06 (s, 2H), 4.41 (s, 1H), 2.92 (dt,  $J = 17.4, 3.8$  Hz, 1H), 2.71 – 2.35 (m, 4H), 2.02 – 1.87 (m, 2H), 1.86 – 1.74 (m, 3H), 1.73 – 1.66 (m, 1H), 1.66 – 1.52 (m, 3H), 1.47 (td,  $J = 13.9, 13.4, 3.7$  Hz, 2H), 1.31 (t,  $J = 8.1$  Hz, 2H), 1.17 (s, 3H), 1.12 – 0.96 (m, 2H), 0.81 (s, 3H).  **$^{13}\text{C}\{^1\text{H}\}$  NMR (100 MHz,  $\text{CDCl}_3$ )**  $\delta$  196.8, 191.5, 171.2, 170.2, 153.4, 135.8, 134.2, 131.4, 130.2, 129.1, 128.8, 128.4, 128.2, 119.4, 119.0, 117.7, 113.3, 112.5, 86.4, 74.9, 55.4, 53.8, 53.1, 50.1, 43.7, 39.3, 37.8, 36.4, 34.6, 33.8, 32.2, 26.3, 25.3, 24.1, 21.3, 17.7, 13.7. **HRMS (ESI,  $m/z$ ):**  $[\text{M} + \text{H}]^+$  calculated for  $\text{C}_{43}\text{H}_{42}\text{N}_5\text{OS}^+$ : 676.3105 found: 676.3103.

**(5*R*,10*S*)-8-([1,1'-biphenyl]-4-yl)-6-amino-4-oxo-2,10-diphenyl-1-thia-3-azaspiro[4.5]deca-2,6,8-triene-7-carbonitrile (4):**

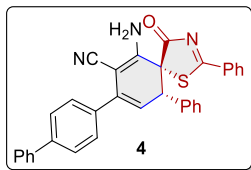

To a stirred solution of **3am** (51.1 mg, 0.1 mmol, 1.0 equiv), in THF (2 ml), Pd(PPh<sub>3</sub>)<sub>4</sub> (11.5 mg, 0.01 mmol, 10 mol %), phenylboronic acid (18.3 mg, 0.15 mmol, 1.5 equiv) and K<sub>2</sub>CO<sub>3</sub> (27.6 mg, 0.2 mmol, 2.0 equiv) were added. The reaction mixture was stirred at 70 °C for 12 h. After the reaction was completed (monitored by TLC), the resulting mixture was concentrated under reduced pressure, and the residue was purified by column chromatography on silica gel to give the product **4** (30.5 mg, 60% yield). [ $\alpha$ ]<sub>D</sub><sup>20</sup> = +71.3 (c = 0.62, CHCl<sub>3</sub>) **HPLC**: **94% ee** (IC, IPA/n-hexane = 30/70, flow rate = 1.0 mL/min,  $\lambda$  = 254 nm),  $t_R$  = 25.48 min (minor), 37.78 min (major). **mp**: 197-199 °C **<sup>1</sup>H NMR (400 MHz, CDCl<sub>3</sub>)**  $\delta$  7.84 (d,  $J$  = 7.7 Hz, 2H), 7.64 (t,  $J$  = 8.2 Hz, 5H), 7.55 (d,  $J$  = 8.2 Hz, 2H), 7.49 – 7.40 (m, 4H), 7.38 (dd,  $J$  = 7.1, 3.2 Hz, 3H), 7.20 (d,  $J$  = 5.7 Hz, 3H), 5.96 (d,  $J$  = 2.9 Hz, 1H), 5.29 (s, 2H), 4.63 (d,  $J$  = 2.9 Hz, 1H). **<sup>13</sup>C{<sup>1</sup>H} NMR (100 MHz, CDCl<sub>3</sub>)**  $\delta$  197.2, 191.5, 155.2, 141.6, 140.6, 136.9, 136.5, 135.9, 135.5, 131.4, 130.3, 129.2, 129.0, 128.9, 128.6, 128.4, 128.1, 127.6, 127.4, 127.2, 120.9, 117.2, 83.4, 74.2, 50.4. **HRMS (ESI, m/z)**: [M + H]<sup>+</sup> calculated for C<sub>23</sub>H<sub>24</sub>N<sub>3</sub>OS<sup>+</sup>: 510.1635 found: 510.1634.

## X-ray crystallographic figures and data of **3aa**

A suitable single crystal of **3aa** was grown by slow evaporation of a solution of **3aa** compound in a mixture of solvent (Ethyl acetate/hexane=1:1) at room temperature.

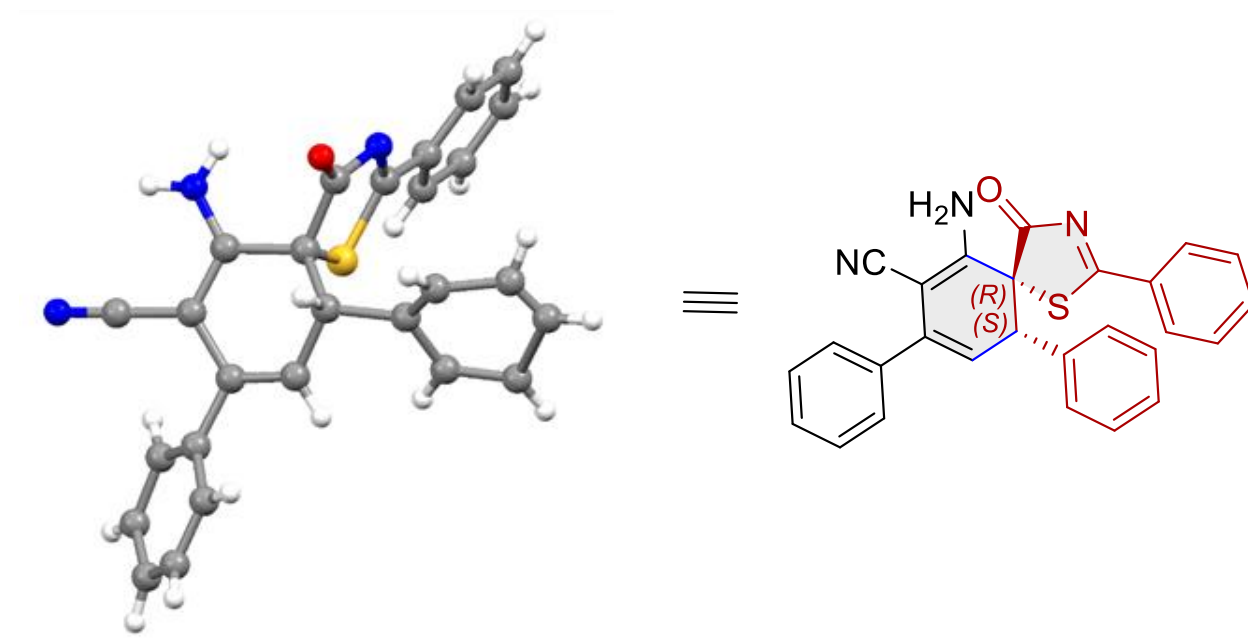

**Figure S1:** Crystal structure (with 50% ellipsoid probability) of **3aa** (CCDC No. 2359432)

(Note: Asymmetric unit is represented; thermal splitting has been removed for clarity)

**Table S8: Crystal data and structure refinement for 3aa (CCDC No. 2359432)****Table 1 Crystal data and structure refinement for 27octb\_0m.**

|                                             |                                                                              |
|---------------------------------------------|------------------------------------------------------------------------------|
| Identification code                         | 27octb_0m                                                                    |
| Empirical formula                           | C <sub>62</sub> H <sub>53</sub> N <sub>6</sub> O <sub>6</sub> S <sub>2</sub> |
| Formula weight                              | 1042.22                                                                      |
| Temperature/K                               | 273.15                                                                       |
| Crystal system                              | triclinic                                                                    |
| Space group                                 | P1                                                                           |
| a/Å                                         | 10.2217(3)                                                                   |
| b/Å                                         | 11.1542(3)                                                                   |
| c/Å                                         | 13.1904(4)                                                                   |
| α/°                                         | 95.1110(10)                                                                  |
| β/°                                         | 94.0180(10)                                                                  |
| γ/°                                         | 111.2480(10)                                                                 |
| Volume/Å <sup>3</sup>                       | 1387.58(7)                                                                   |
| Z                                           | 1                                                                            |
| ρ <sub>calc</sub> /cm <sup>3</sup>          | 1.247                                                                        |
| μ/mm <sup>-1</sup>                          | 0.153                                                                        |
| F(000)                                      | 547.0                                                                        |
| Crystal size/mm <sup>3</sup>                | 0.2 × 0.2 × 0.2                                                              |
| Radiation                                   | MoKα (λ = 0.71073)                                                           |
| 2θ range for data collection/°              | 6.836 to 56.68                                                               |
| Index ranges                                | -13 ≤ h ≤ 13, -14 ≤ k ≤ 14, -17 ≤ l ≤ 17                                     |
| Reflections collected                       | 22503                                                                        |
| Independent reflections                     | 13648 [R <sub>int</sub> = 0.0263, R <sub>sigma</sub> = 0.0515]               |
| Data/restraints/parameters                  | 13648/71/648                                                                 |
| Goodness-of-fit on F <sup>2</sup>           | 1.028                                                                        |
| Final R indexes [I ≥ 2σ (I)]                | R <sub>1</sub> = 0.0517, wR <sub>2</sub> = 0.1256                            |
| Final R indexes [all data]                  | R <sub>1</sub> = 0.0577, wR <sub>2</sub> = 0.1310                            |
| Largest diff. peak/hole / e Å <sup>-3</sup> | 0.35/-0.61                                                                   |
| Flack parameter                             | 0.13(3)                                                                      |

82 Y

NOMOVE FORCED

Prob = 50  
Temp = 273

PLATON-May 30 15:50:20 2024 - (60124)

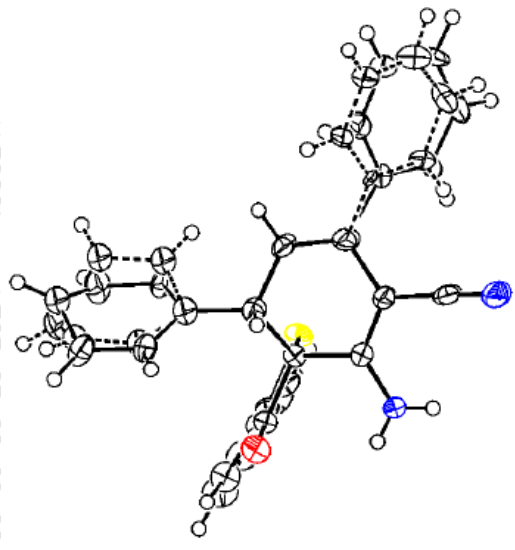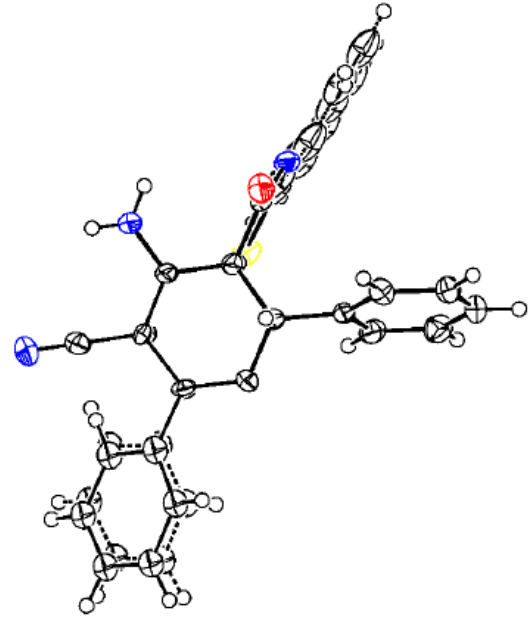

Z 123

27octb\_0m

P 1

R = 0.06

RES= 0-147 X

### Quantum yield calculation:

Calculated quantum yield ( $\phi$ ) for compound **3aa** = 5.89%.

Here, we used quinine sulfate as the internal standard with  $\phi = 54.6\%$  in 0.5 M H<sub>2</sub>SO<sub>4</sub>. Using formula:

$$\phi_X = \left(\frac{A_R}{A_X}\right) \left(\frac{E_X}{E_R}\right) \left(\frac{\eta_X}{\eta_R}\right)^2 \phi_R$$

Here, the absorbance was set to 0.2 at  $\lambda = 350$  nm for both the sample and internal standard,  $E_X$  is the area under the curve for the sample (**3aa**), and  $E_R$  is the area under the curve for quinine sulfate (internal standard).  $\eta_X$  is the refractive index for methanol, and  $\eta_R$  is the refractive index for H<sub>2</sub>O.  $\phi_R$  is the quantum yield for quinine sulfate.

### References:

1. (a) Zhu, X.-L.; He, W.-J.; Yu, L.-L.; Cai, C.-W.; Zuo, Z.-L.; Qin, D.-B.; Liu, Q.-Z.; Jing, L.-H. Organocatalytic Asymmetric Vinylogous Michael Addition of Dicyanoolefins to Imine Intermediates Generated *in situ* from Arenesulfonylalkylindoles. *Adv. Synth. Catal.* **2012**, *354*, 2965-2970. (b) Dhara, H. N.; Rakshit, A.; Alam, T.; Sahoo, A. K.; Patel, B. K. Visible-Light-Mediated Solvent-Switched Photosensitizer-Free Synthesis of Polyfunctionalized Quinolines and Pyridines. *Org. Lett.* **2023**, *25*, 471-476.
2. (a) Lin, L.; Yang, Y.; Wang, M.; Lai, L.; Guo, Y.; Wang, R. Oxidative *N*-Heterocyclic Carbene Catalyzed Stereoselective Annulation of Simple Aldehydes and 5-Alkenyl Thiazolones *Chem. Commun.* **2015**, *51*, 8134-8137. (b) Manna, A.; Rohilla, S.; Singh, V. K. Enantioselective Synthesis of Thiazolopyran Derivatives via a Direct Vinylogous Michael-*oxa*-Michael Sequence. *Org. Lett.* **2024**, *26*, 280-285.

## NMR Spectra:

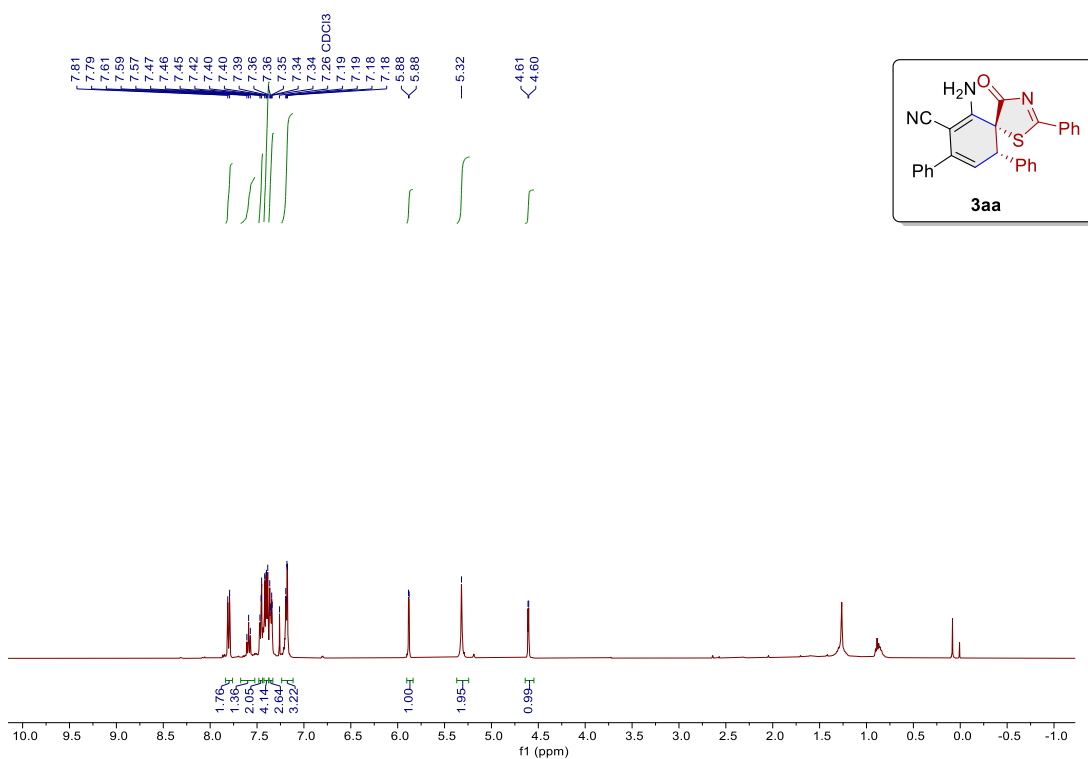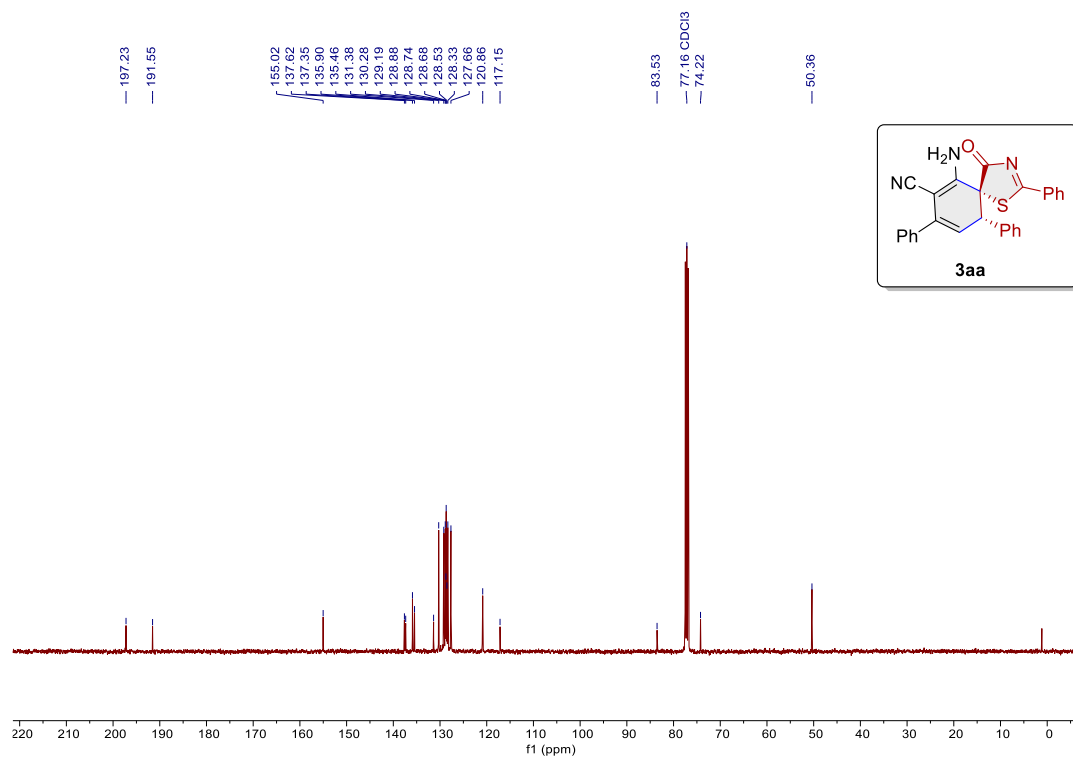

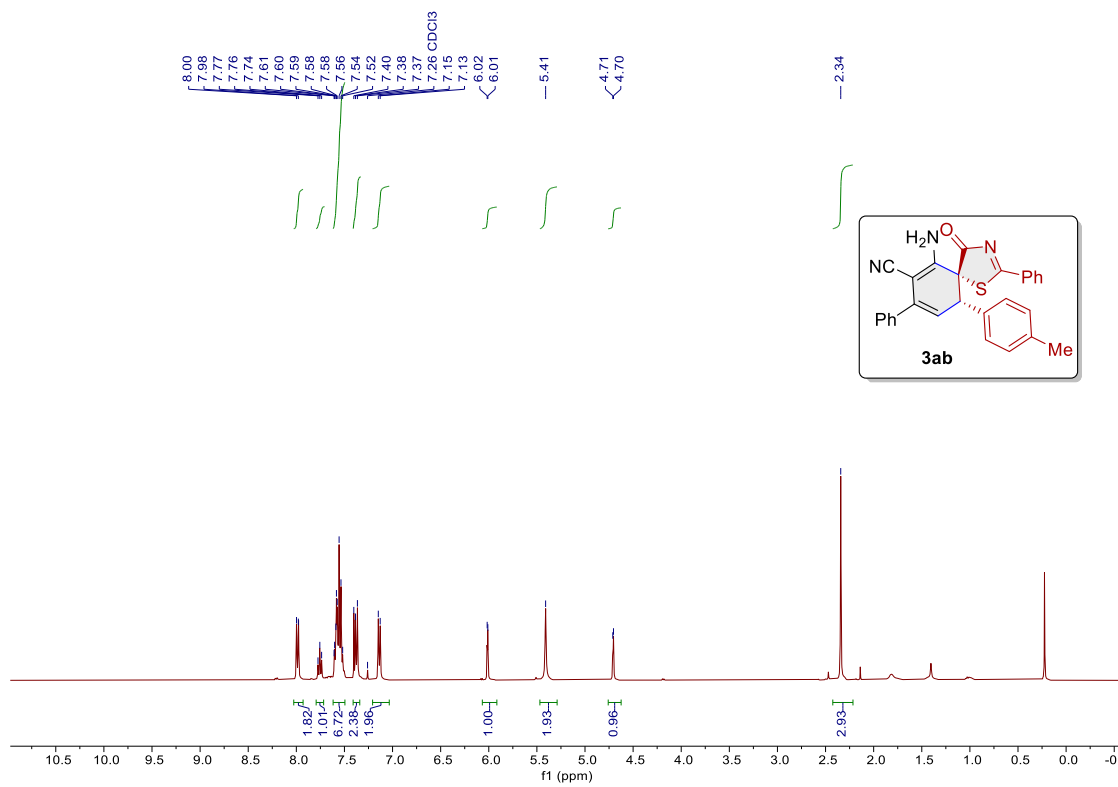

400 MHz <sup>1</sup>H NMR spectra of compound **3ab** in CDCl<sub>3</sub>

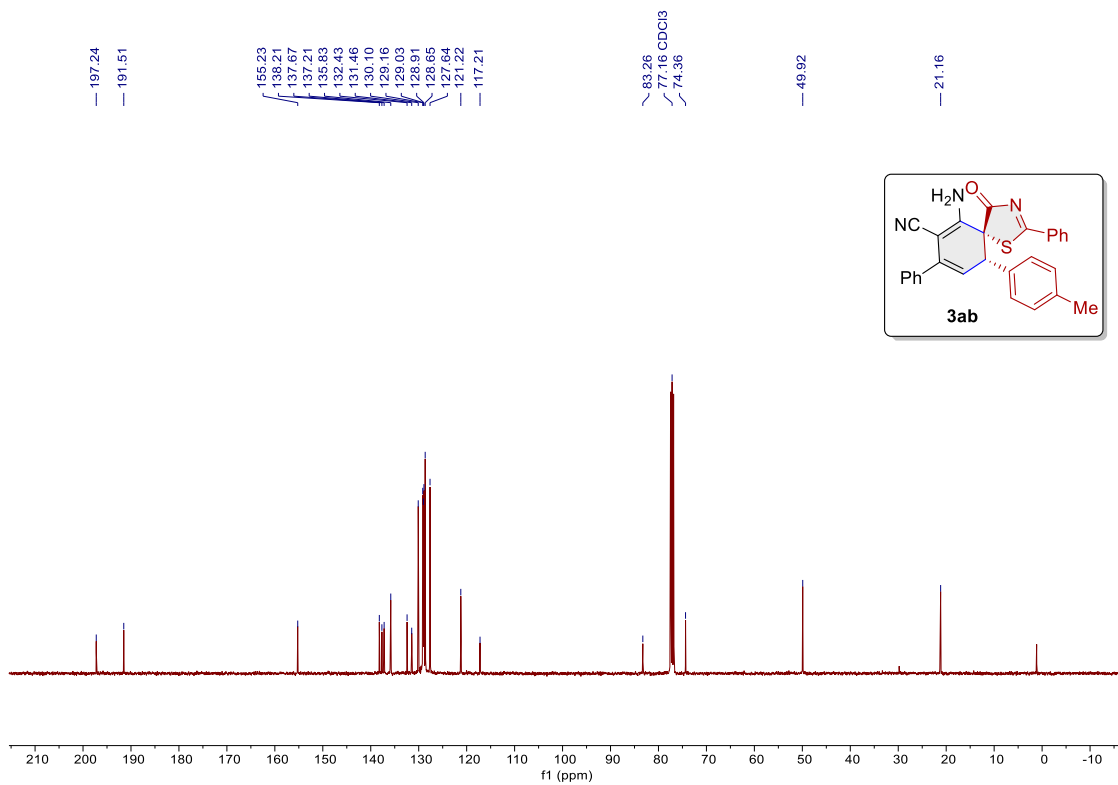

100 MHz <sup>13</sup>C{<sup>1</sup>H} NMR spectra of compound **3ab** in CDCl<sub>3</sub>



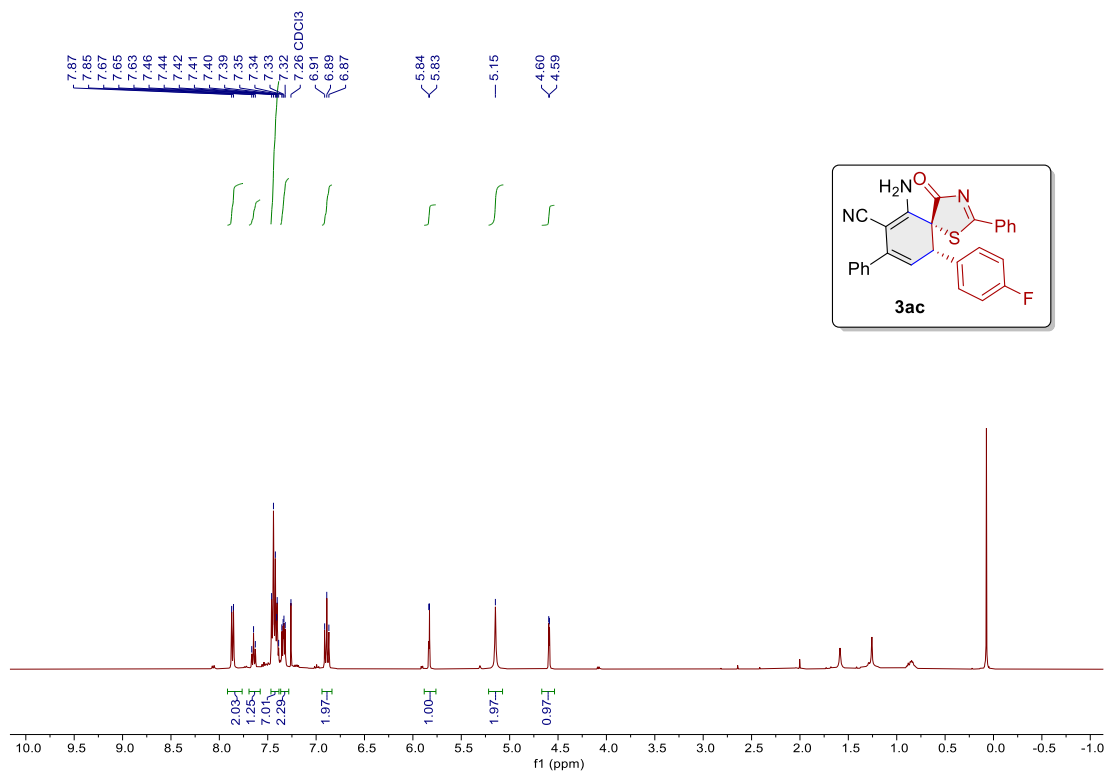

400 MHz <sup>1</sup>H NMR spectra of compound **3ac** in CDCl<sub>3</sub>

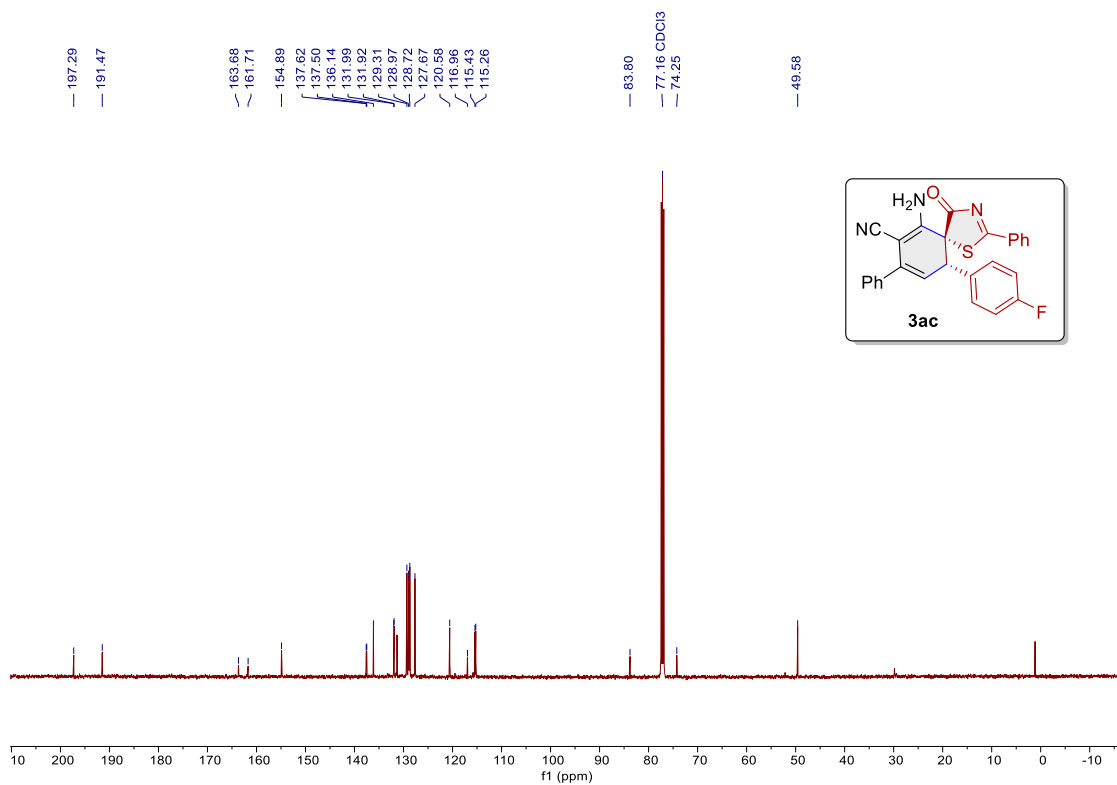

100 MHz <sup>13</sup>C{<sup>1</sup>H} NMR spectra of compound **3ac** in CDCl<sub>3</sub>

-113.05

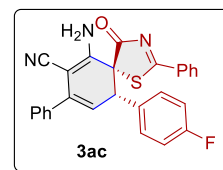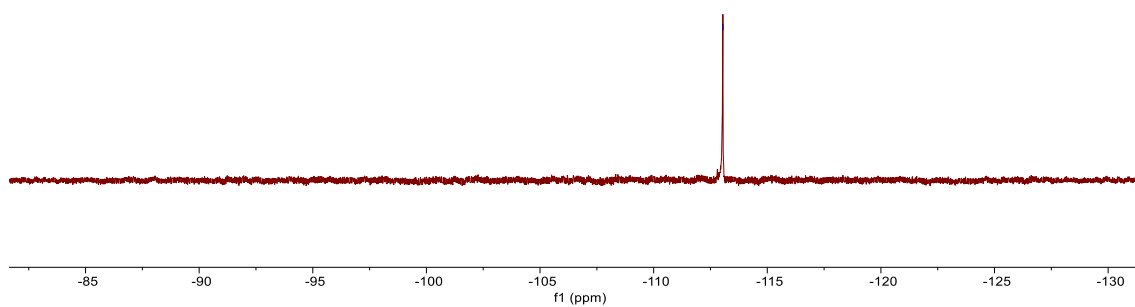

471 MHz  $^{19}\text{F}\{^1\text{H}\}$  NMR spectra of compound **3ac** in  $\text{CDCl}_3$

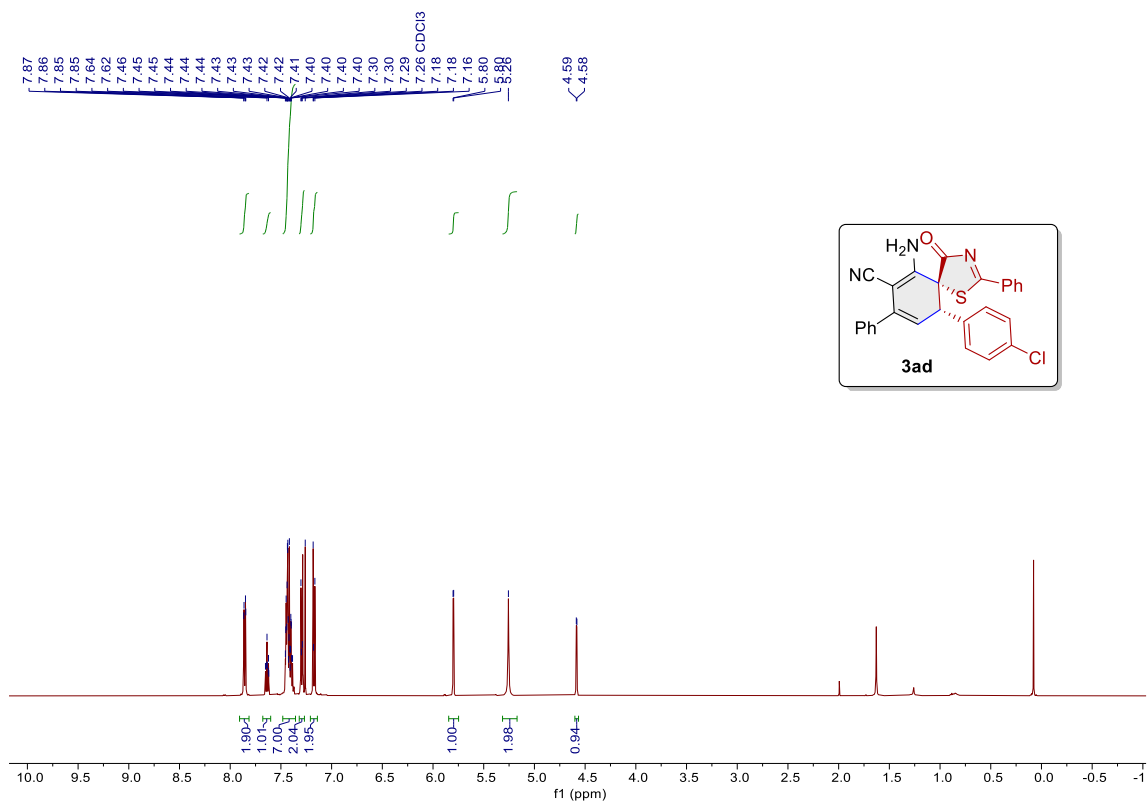

500 MHz  $^1\text{H}$  NMR spectra of compound **3ad** in  $\text{CDCl}_3$

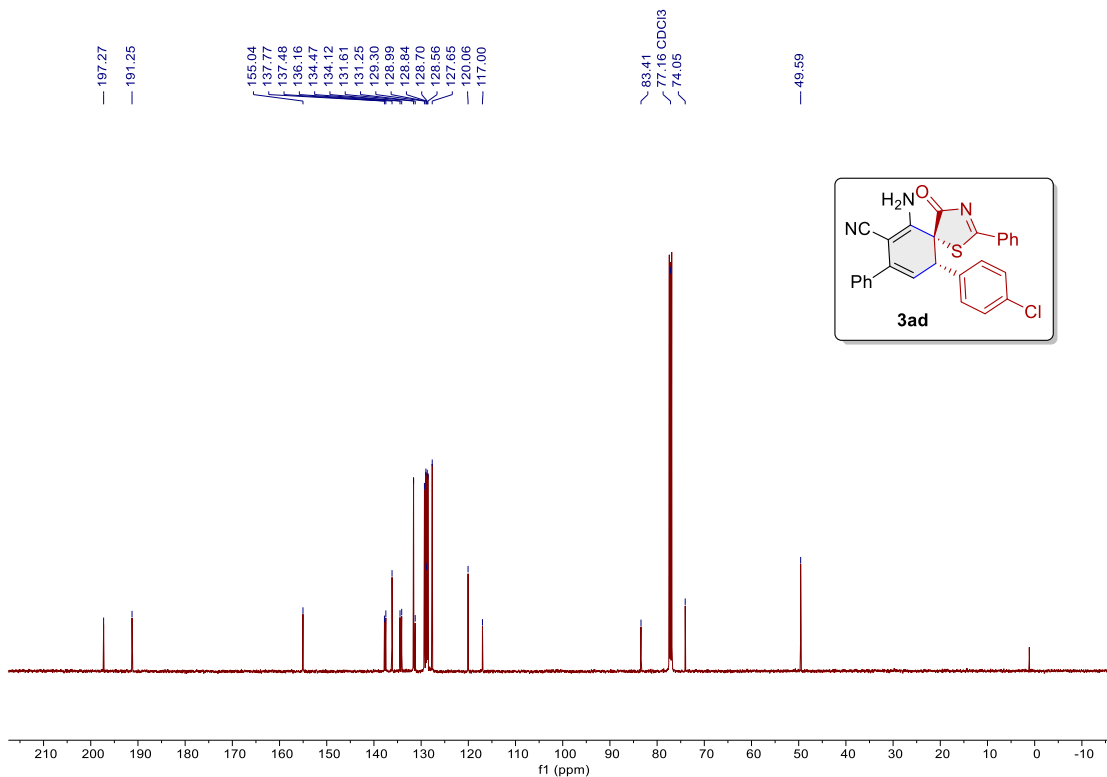

125 MHz  $^{13}\text{C}\{^1\text{H}\}$  NMR spectra of compound **3ad** in  $\text{CDCl}_3$

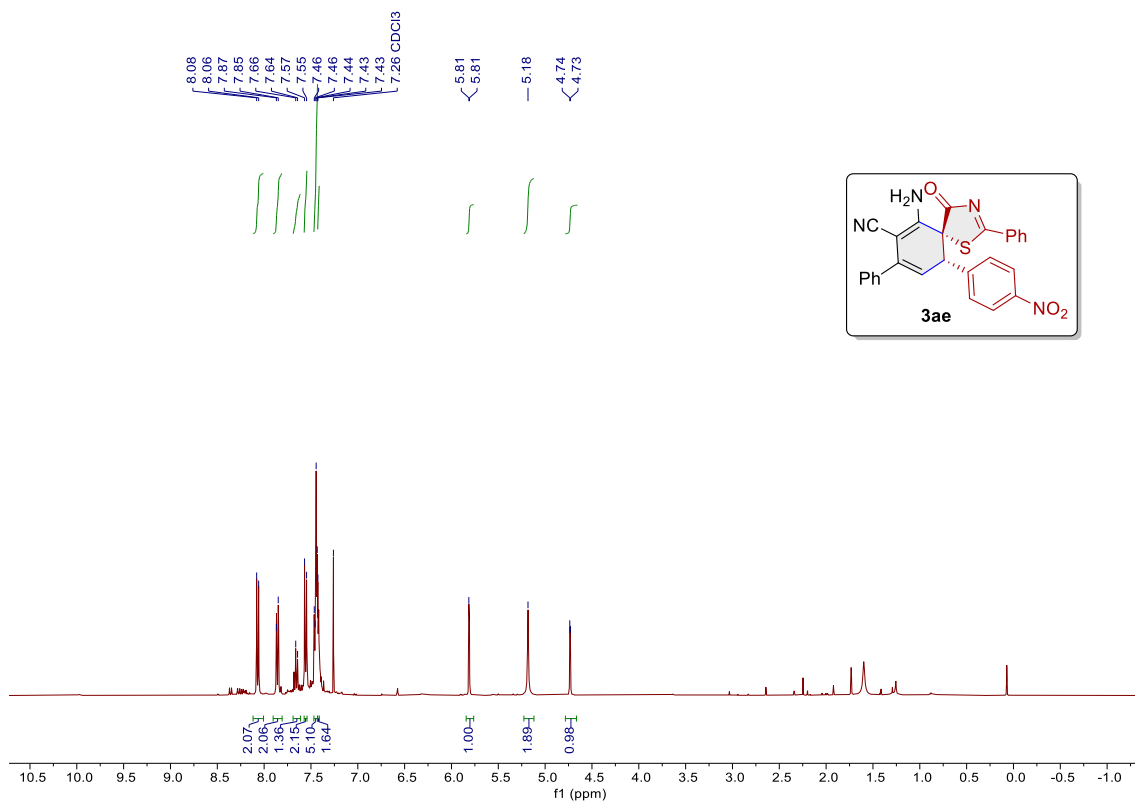

400 MHz <sup>1</sup>H NMR spectra of compound **3ae** in CDCl<sub>3</sub>

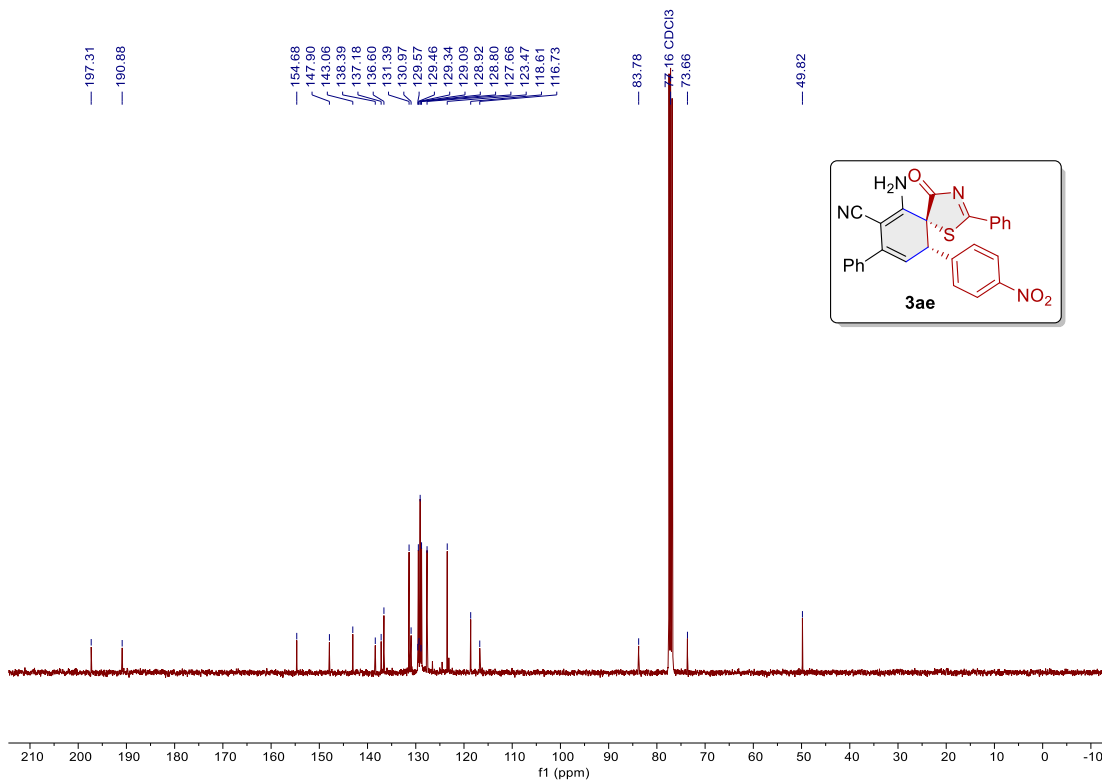

100 MHz <sup>13</sup>C{<sup>1</sup>H} NMR spectra of compound **3ae** in CDCl<sub>3</sub>

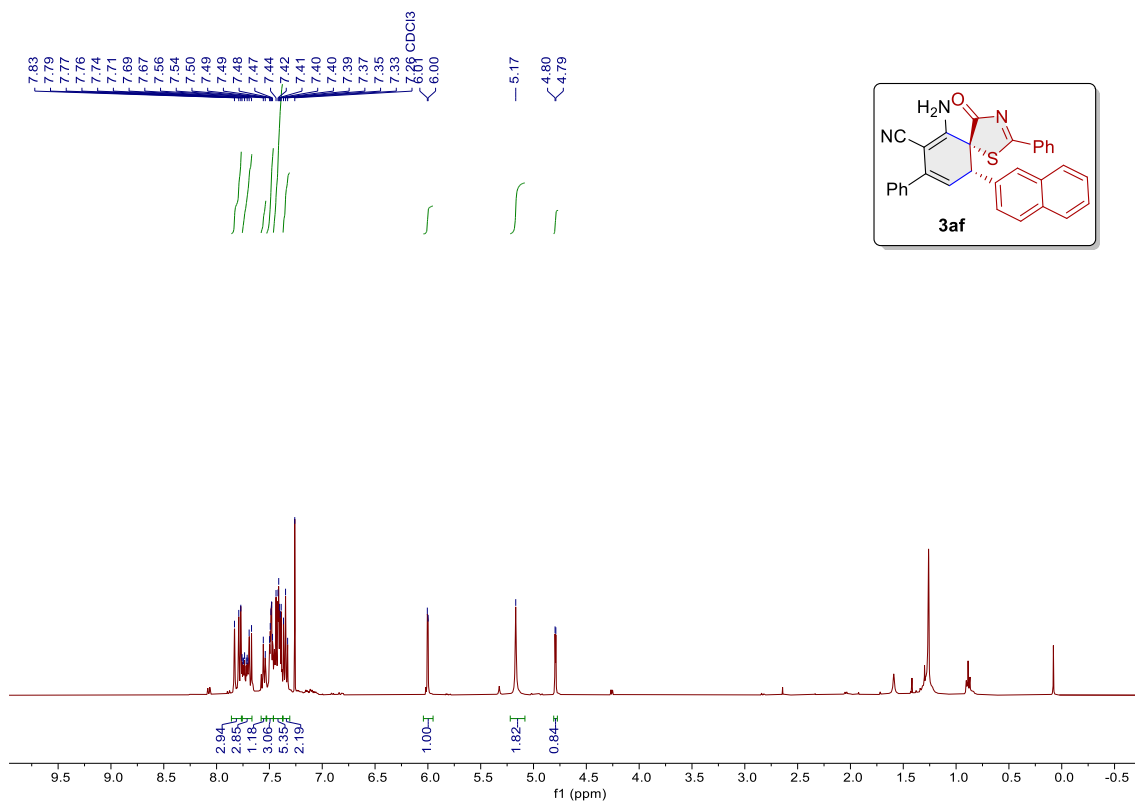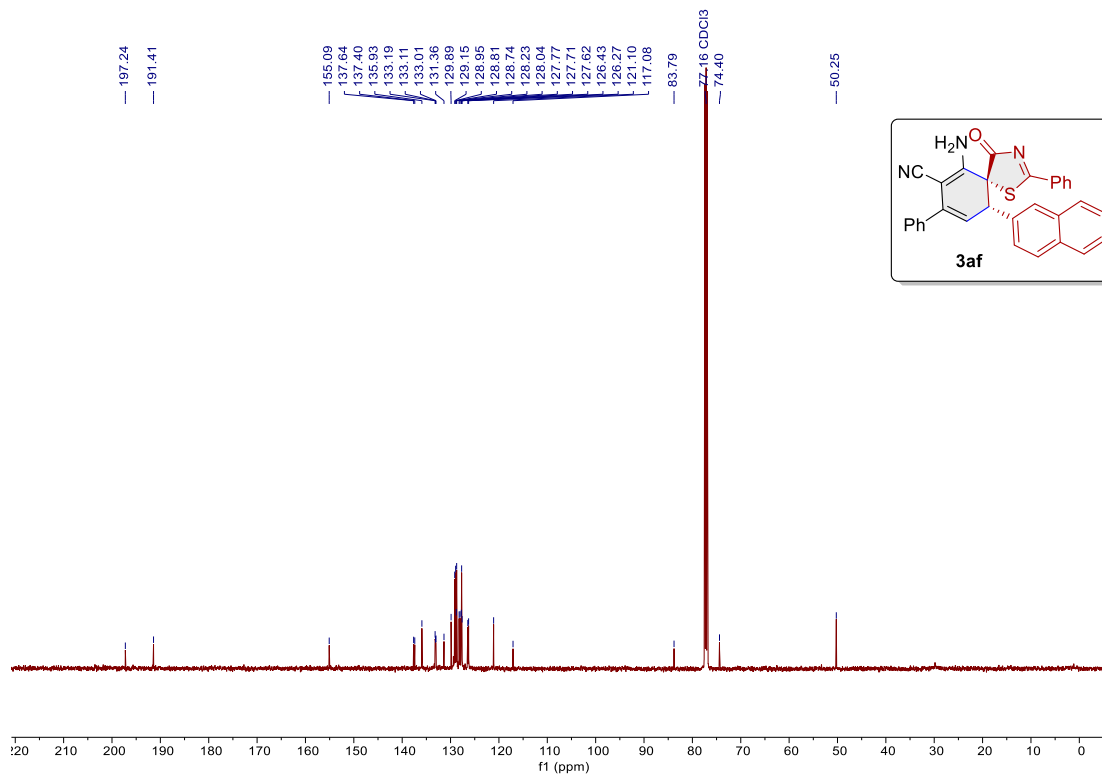

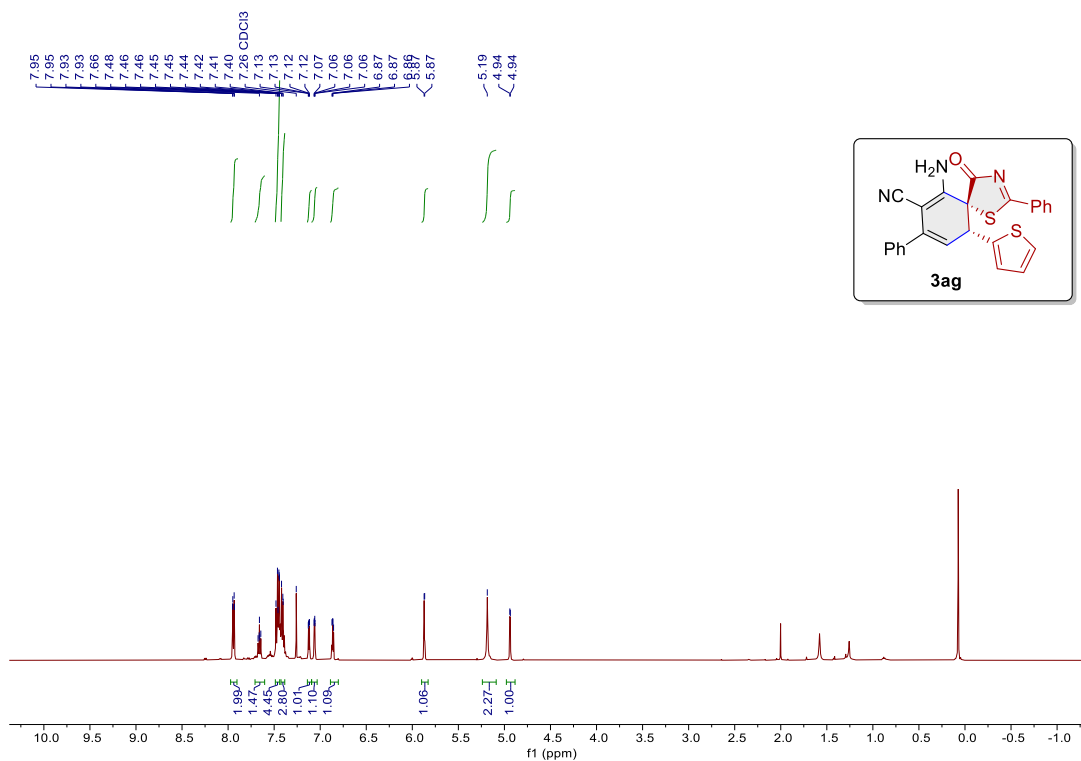

500 MHz  $^1\text{H}$  NMR spectra of compound **3ag** in  $\text{CDCl}_3$

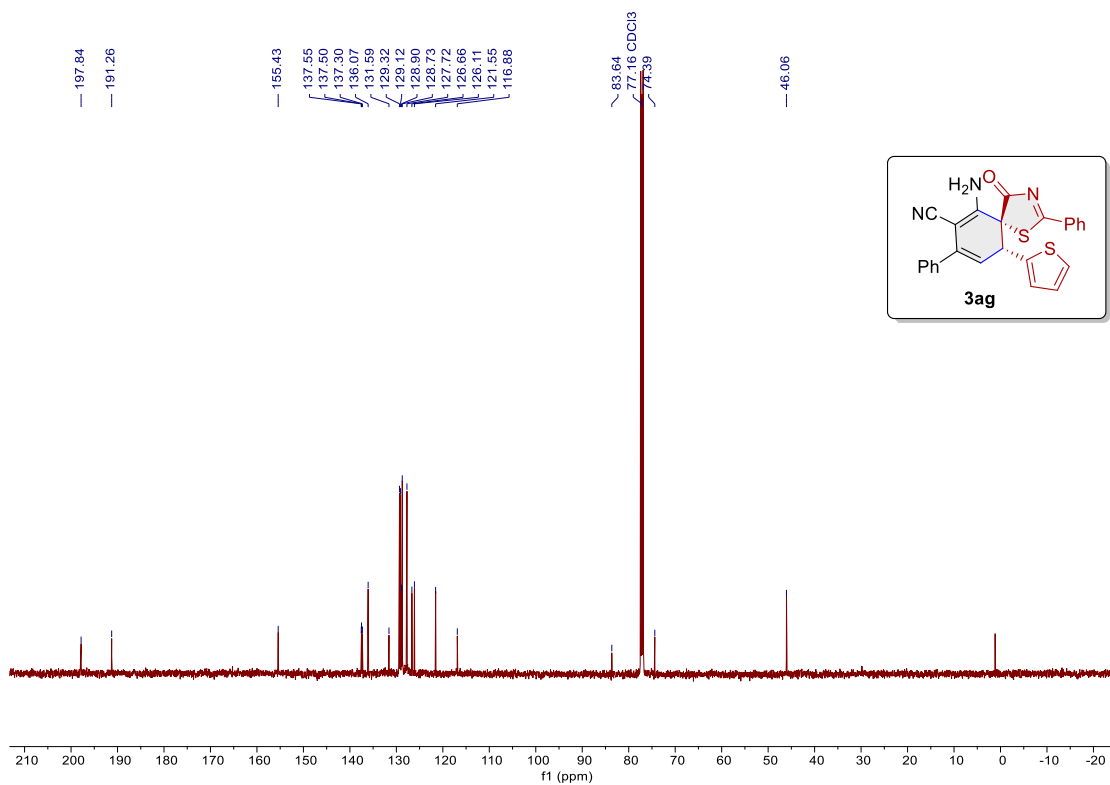

125 MHz  $^{13}\text{C}\{^1\text{H}\}$  NMR spectra of compound **3ag** in  $\text{CDCl}_3$

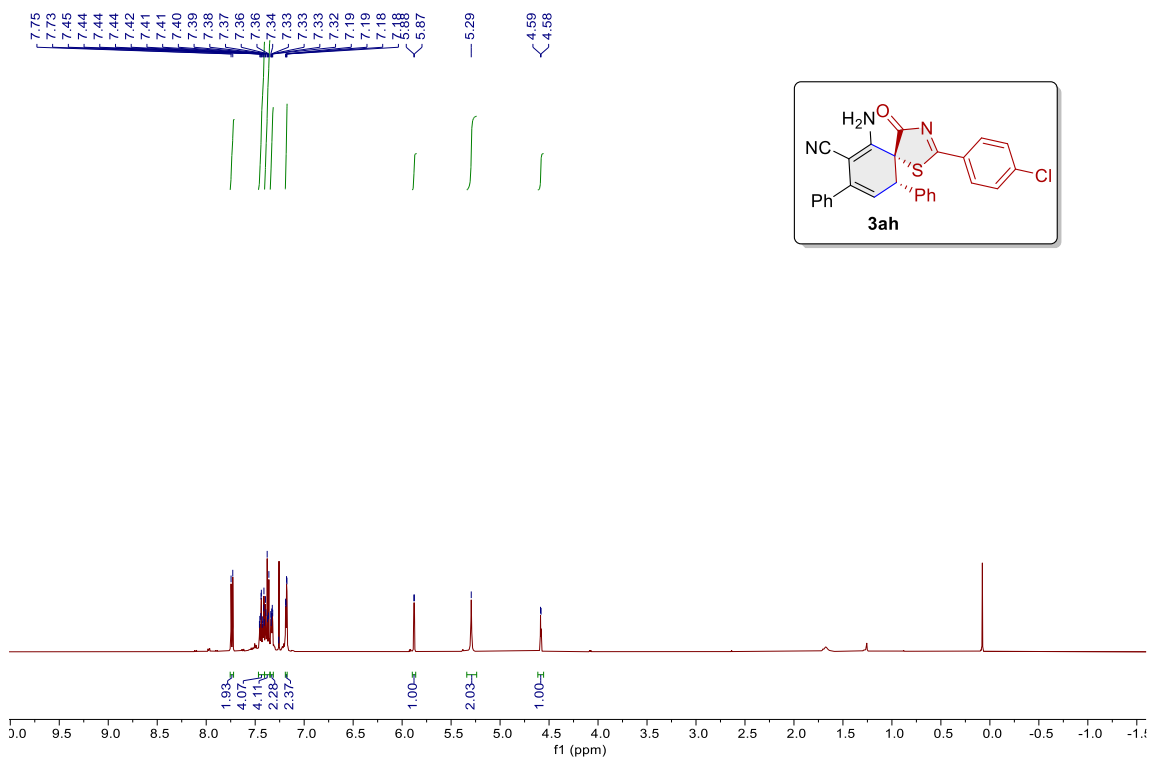

500 MHz <sup>1</sup>H NMR spectra of compound **3ah** in CDCl<sub>3</sub>

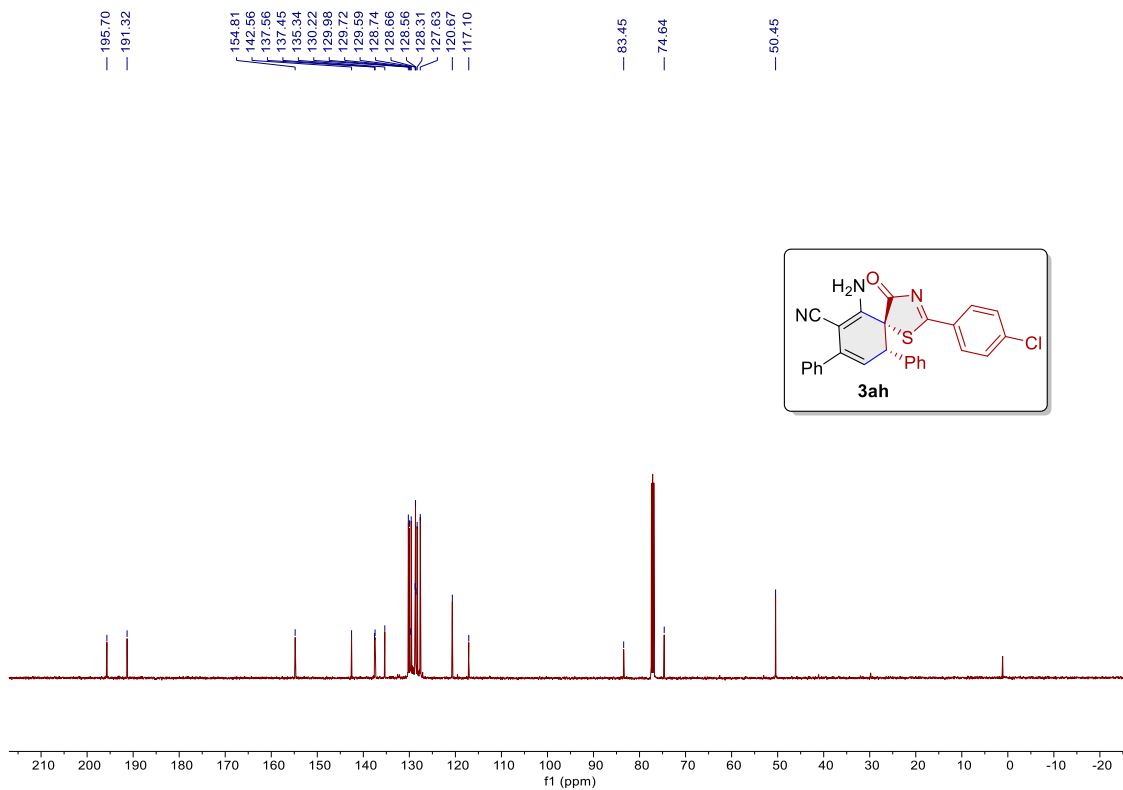

125 MHz  $^{13}\text{C}\{^1\text{H}\}$  NMR spectra of compound **3ai** in  $\text{CDCl}_3$

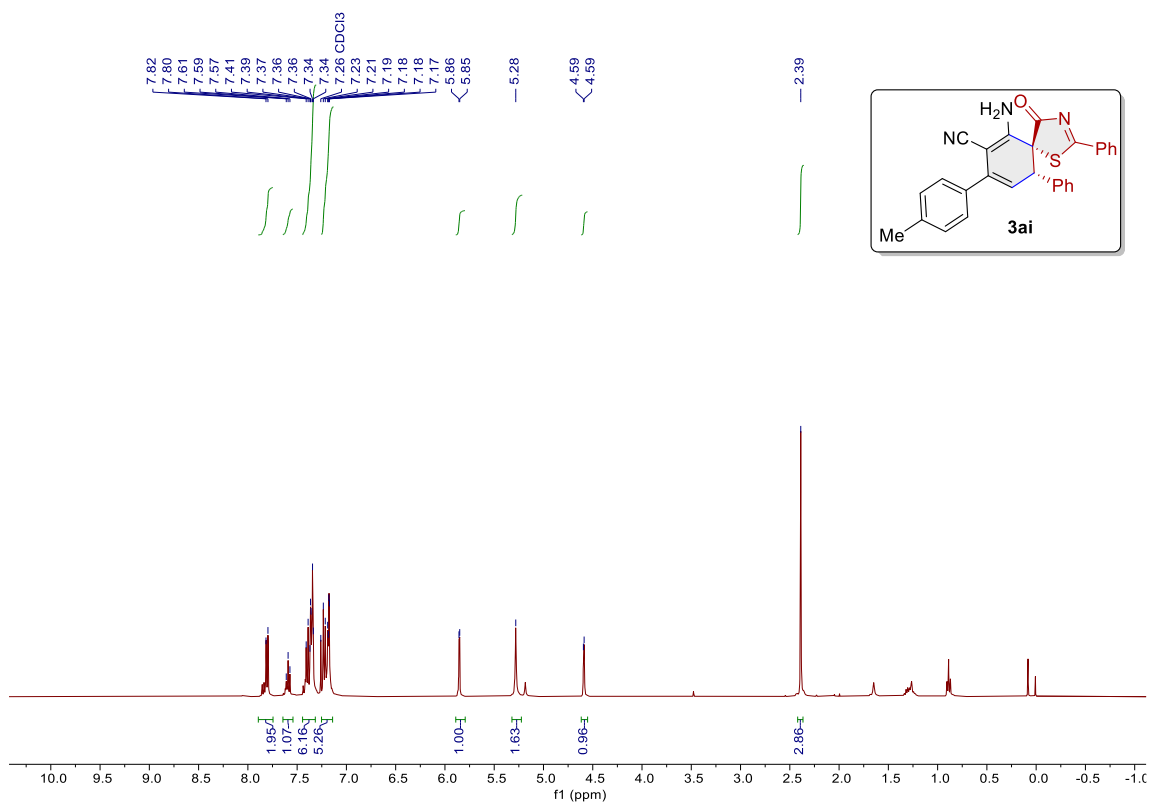

400 MHz  $^1\text{H}$  NMR spectra of compound **3ai** in  $\text{CDCl}_3$

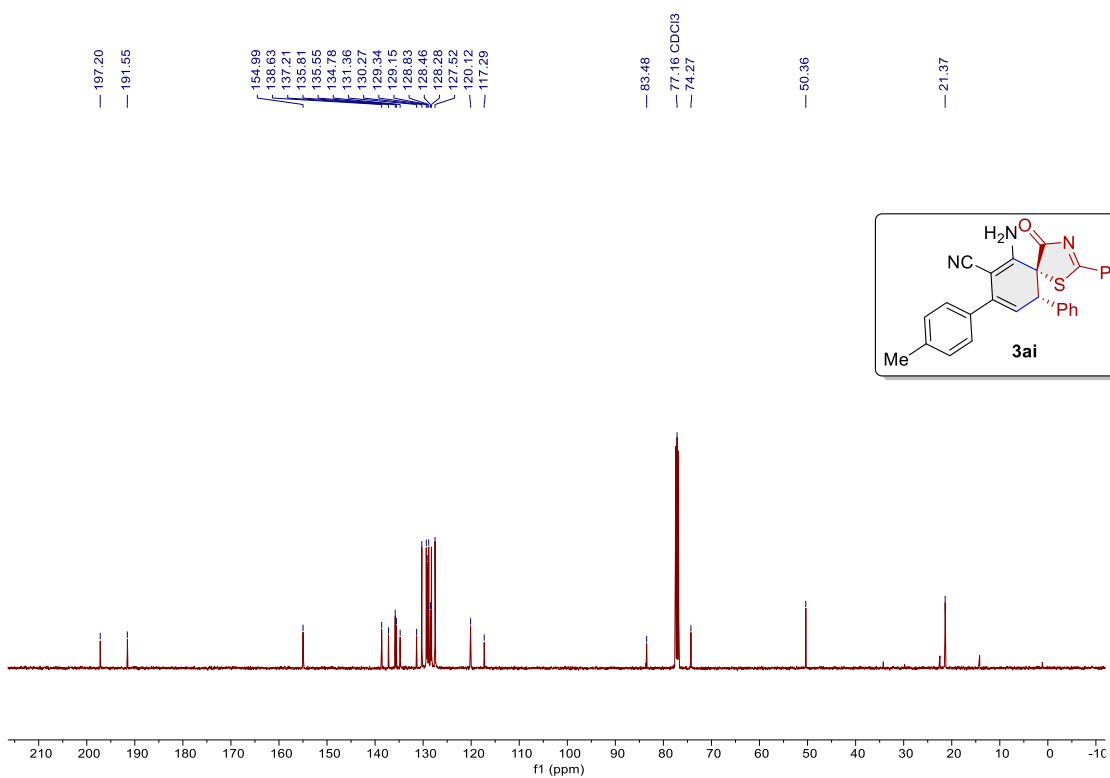



100 MHz  $^{13}\text{C}\{^1\text{H}\}$  NMR spectra of compound **3aj** in  $\text{CDCl}_3$

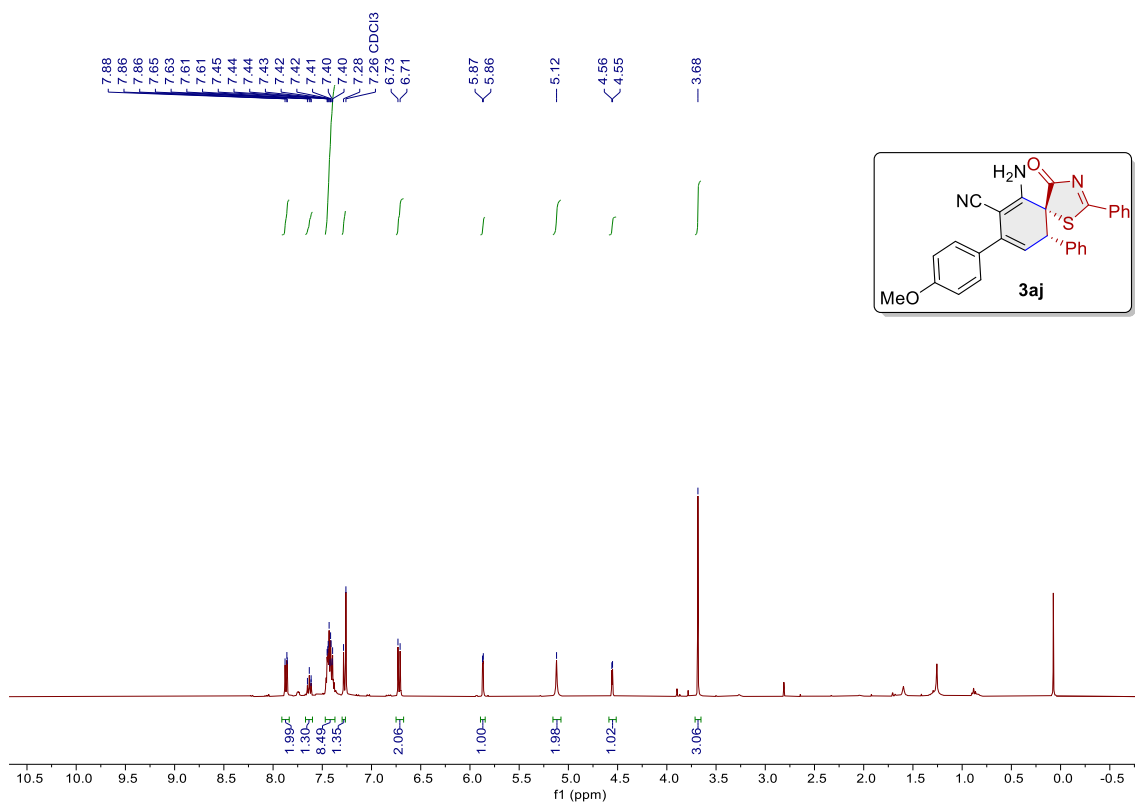

400 MHz  $^1\text{H}$  NMR spectra of compound **3aj** in  $\text{CDCl}_3$

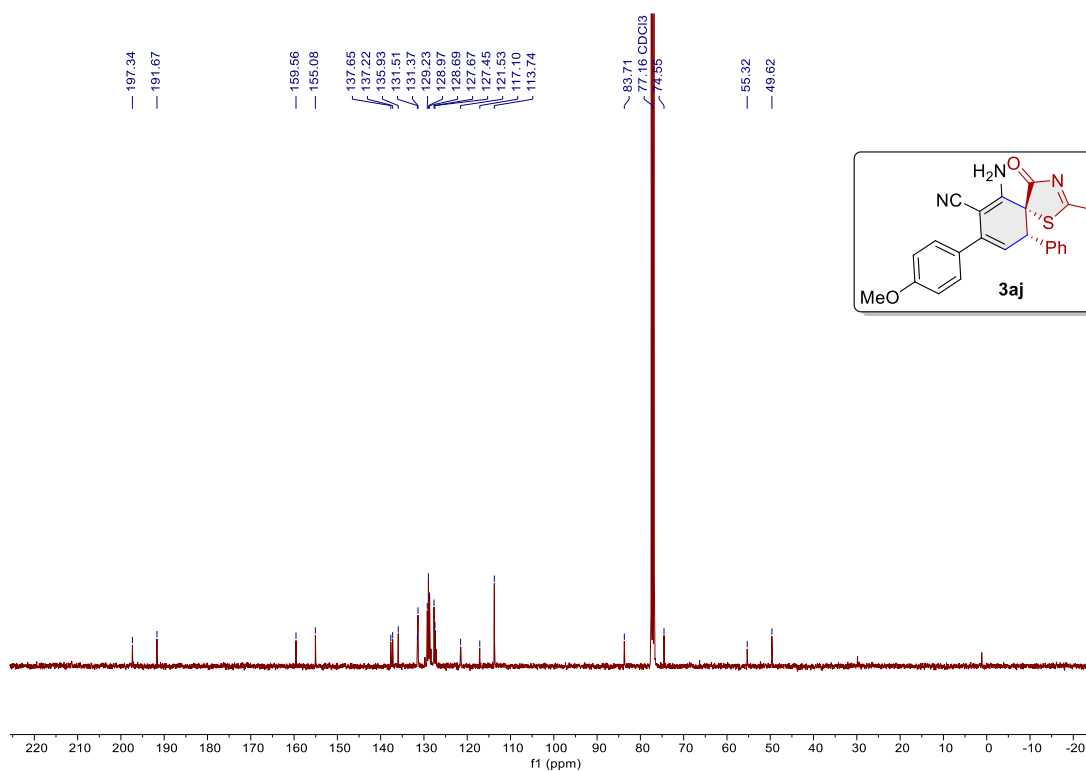

100 MHz  $^{13}\text{C}\{^1\text{H}\}$  NMR spectra of compound **3aj** in  $\text{CDCl}_3$

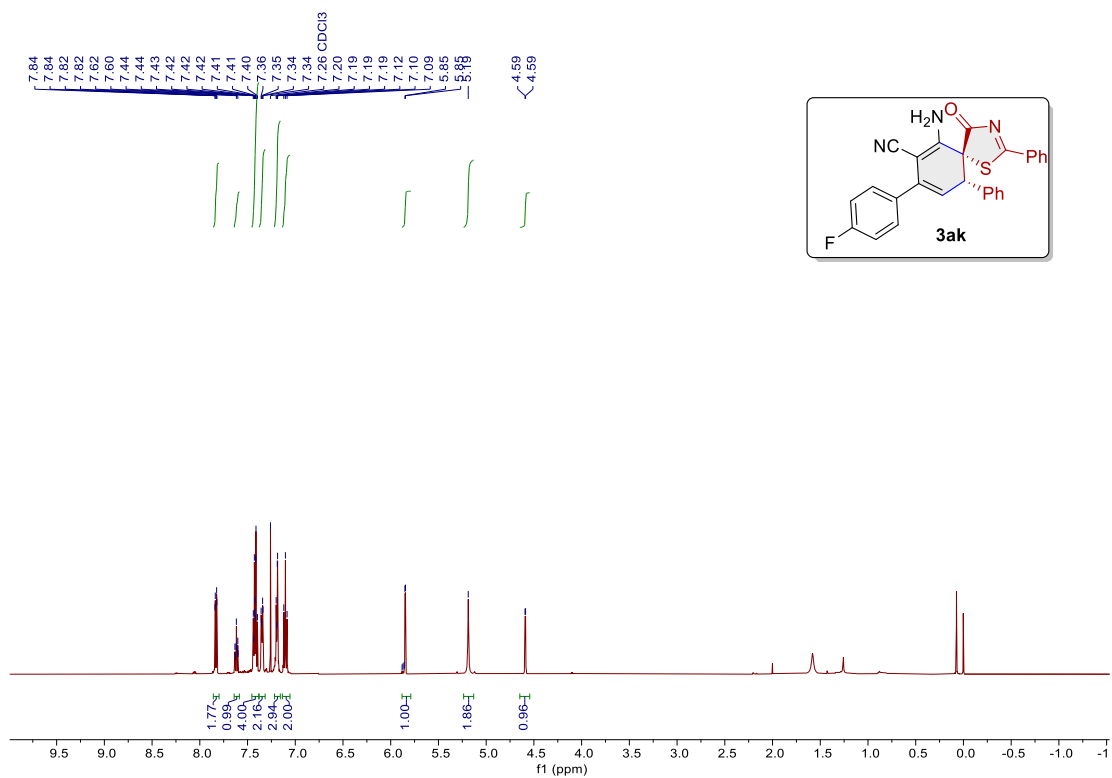

400 MHz  $^1\text{H}$  NMR spectra of compound **3ak** in  $\text{CDCl}_3$

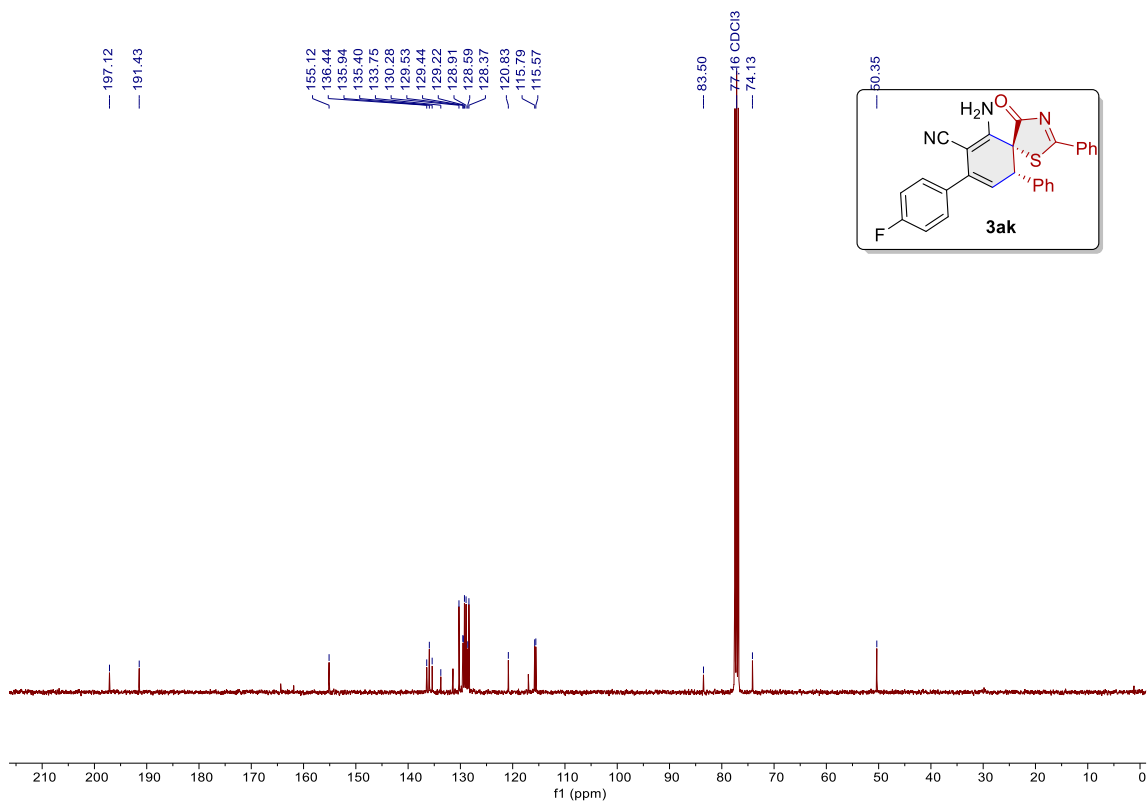

100 MHz  $^{13}\text{C}\{^1\text{H}\}$  NMR spectra of compound **3ak** in  $\text{CDCl}_3$

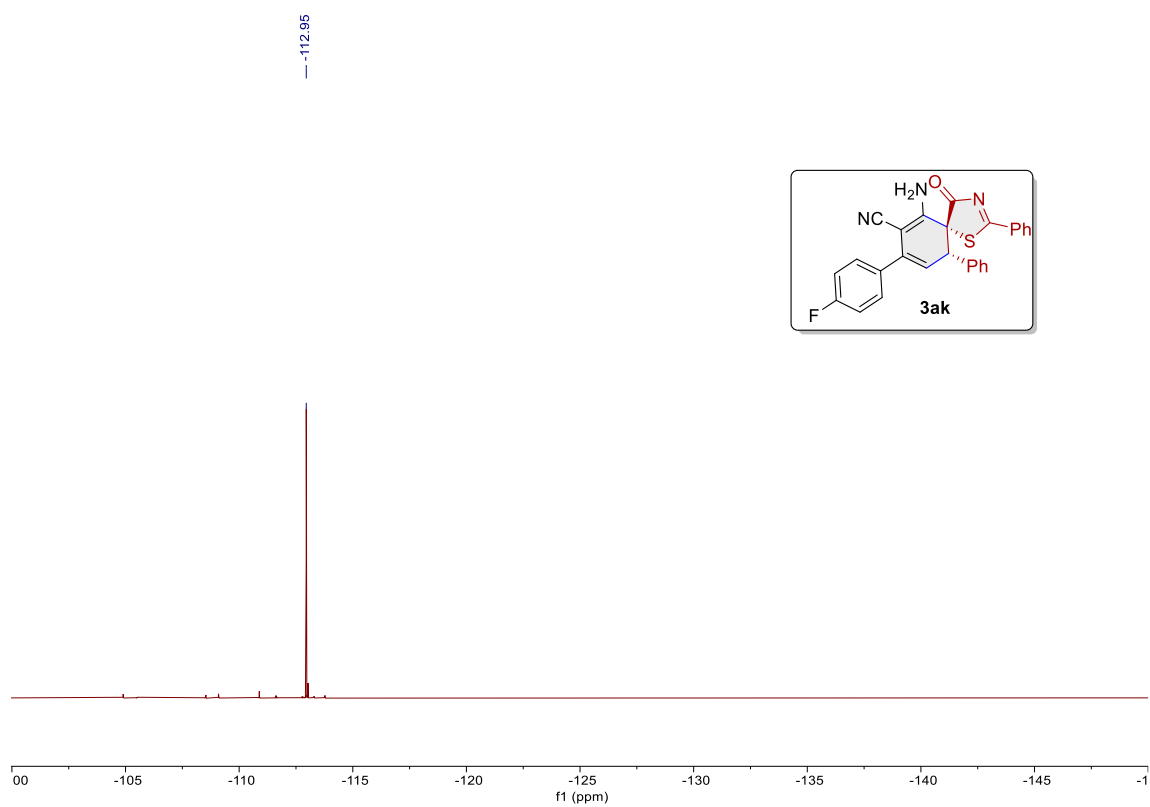

471 MHz  $^{19}\text{F}\{^1\text{H}\}$  NMR spectra of compound **3ak** in  $\text{CDCl}_3$

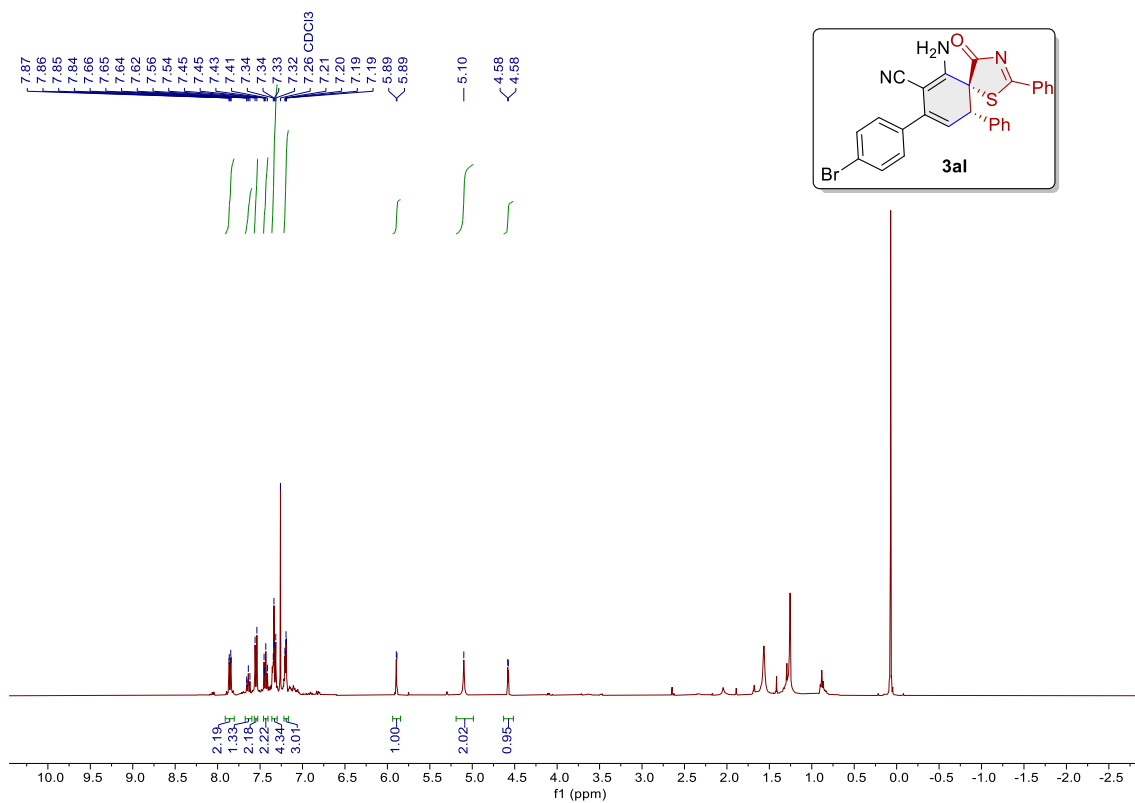

500 MHz <sup>1</sup>H NMR spectra of compound **3al** in CDCl<sub>3</sub>

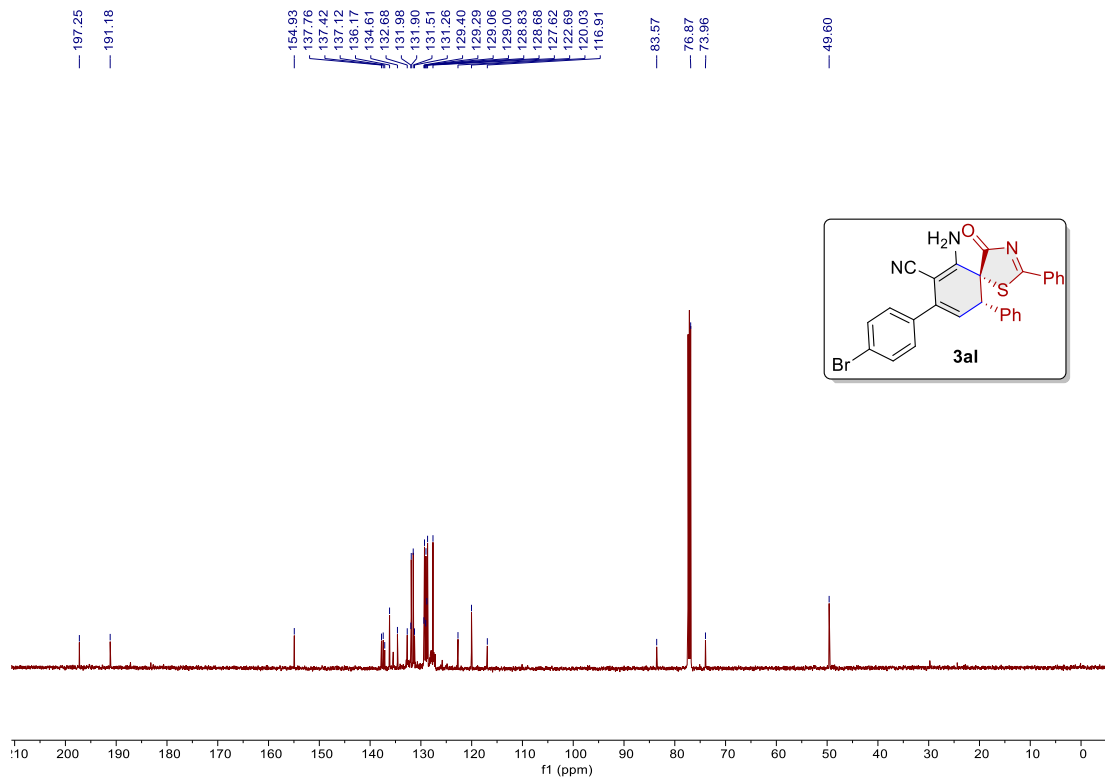

125 MHz <sup>13</sup>C{<sup>1</sup>H} NMR spectra of compound **3al** in CDCl<sub>3</sub>

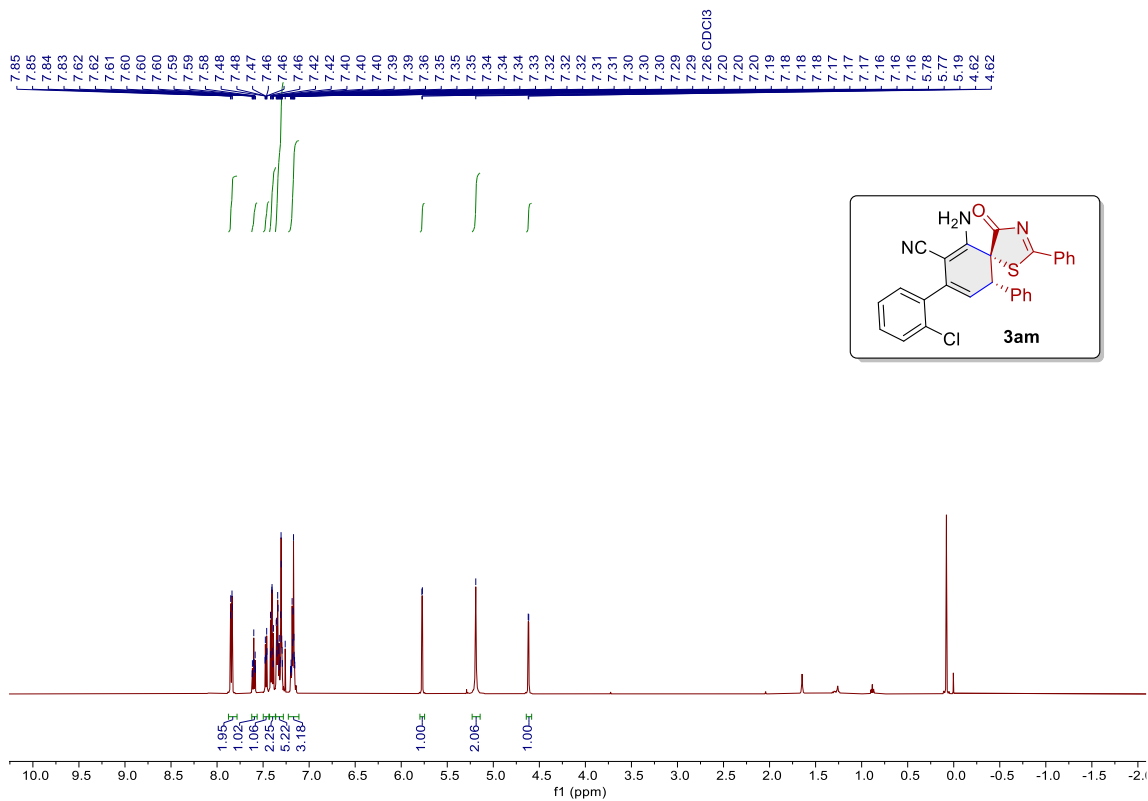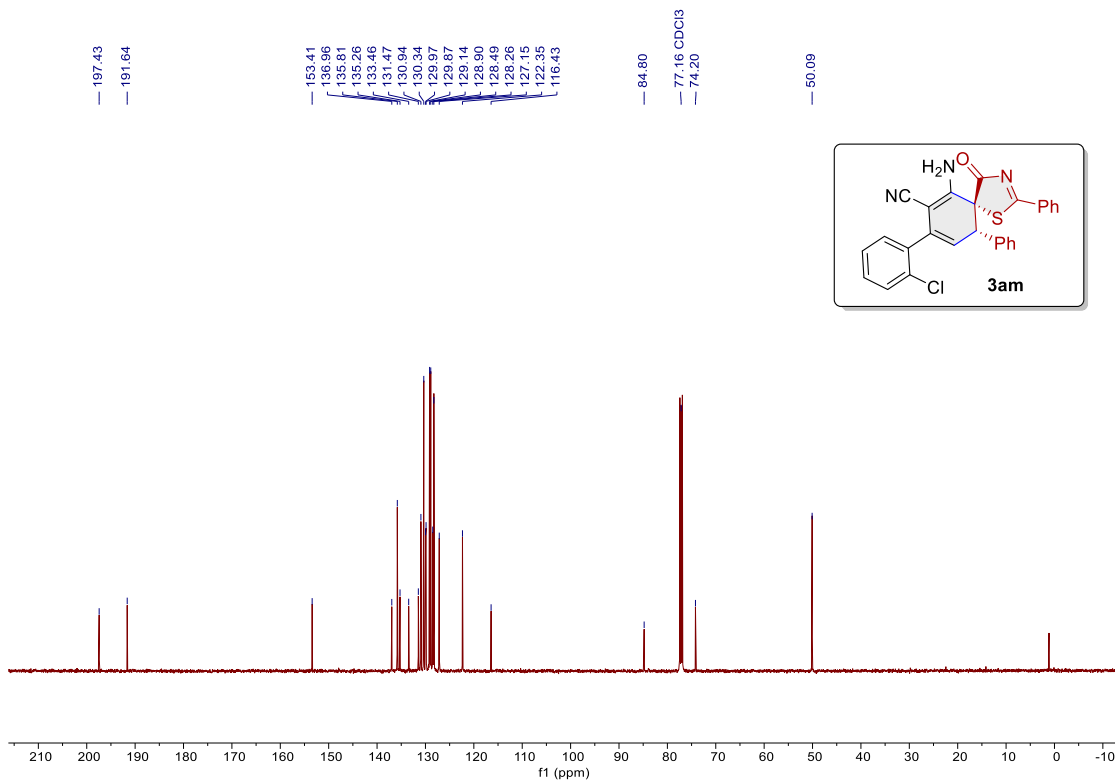

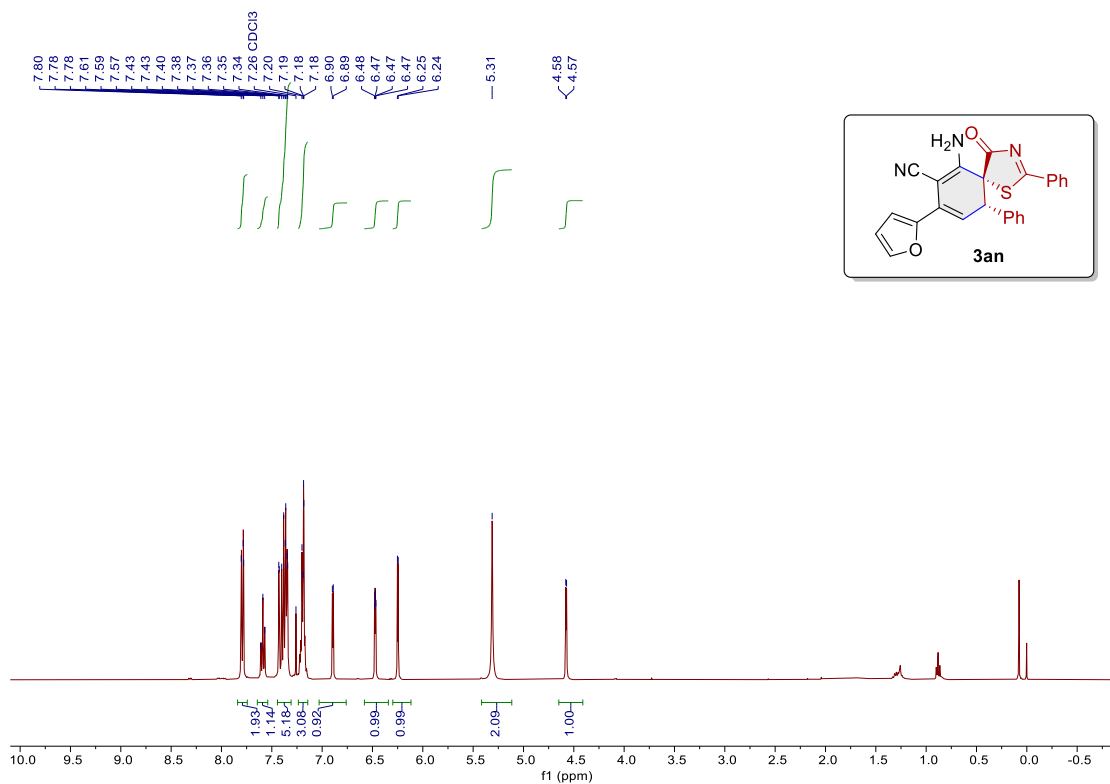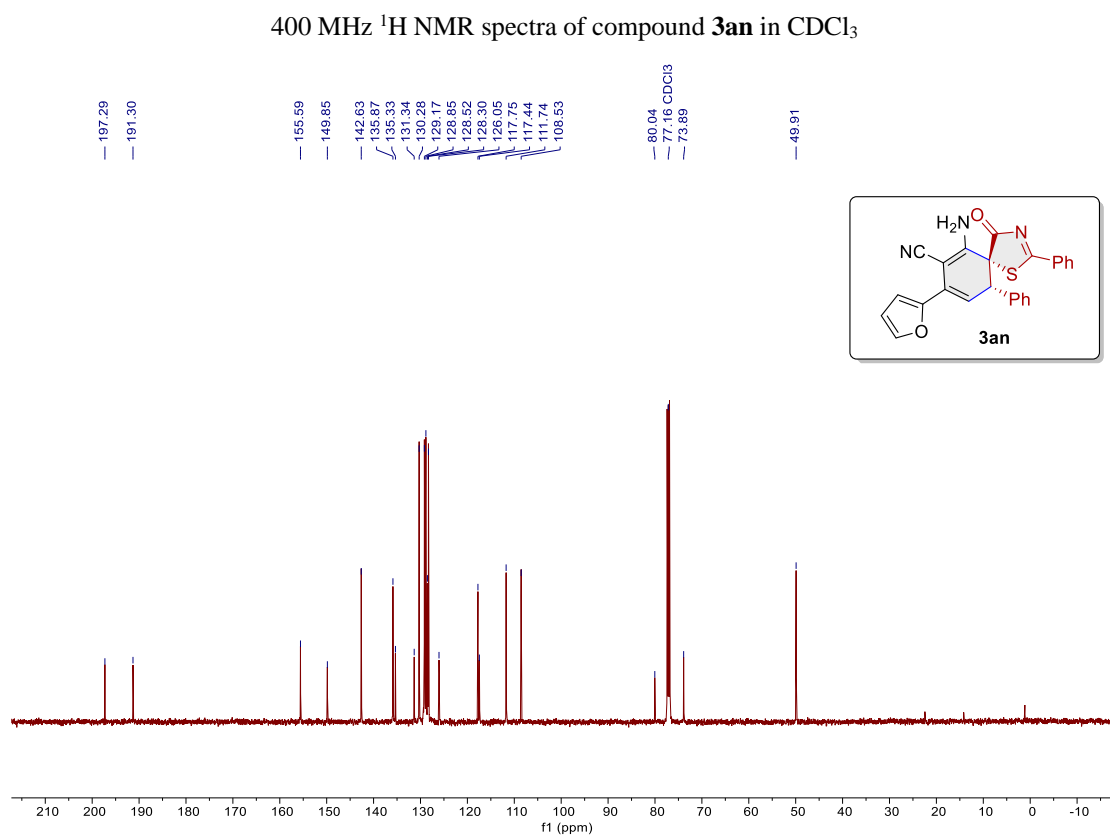

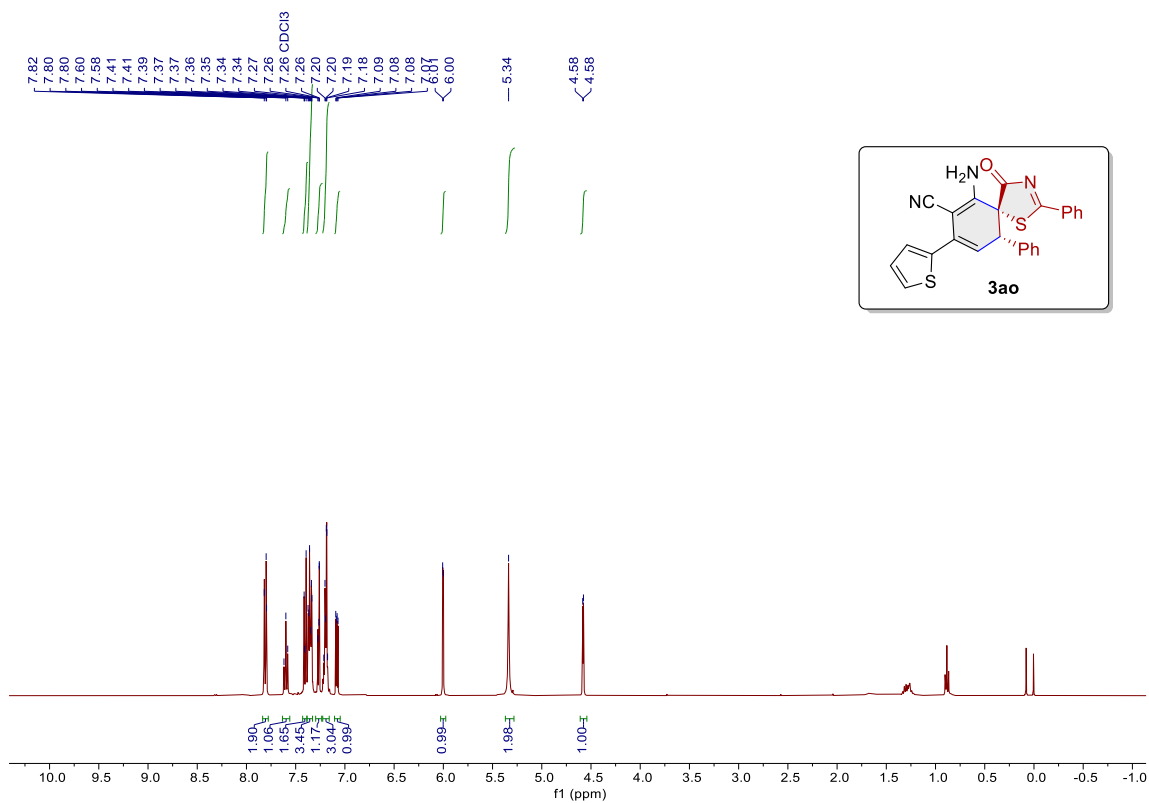

400 MHz <sup>1</sup>H NMR spectra of compound **3ao** in CDCl<sub>3</sub>

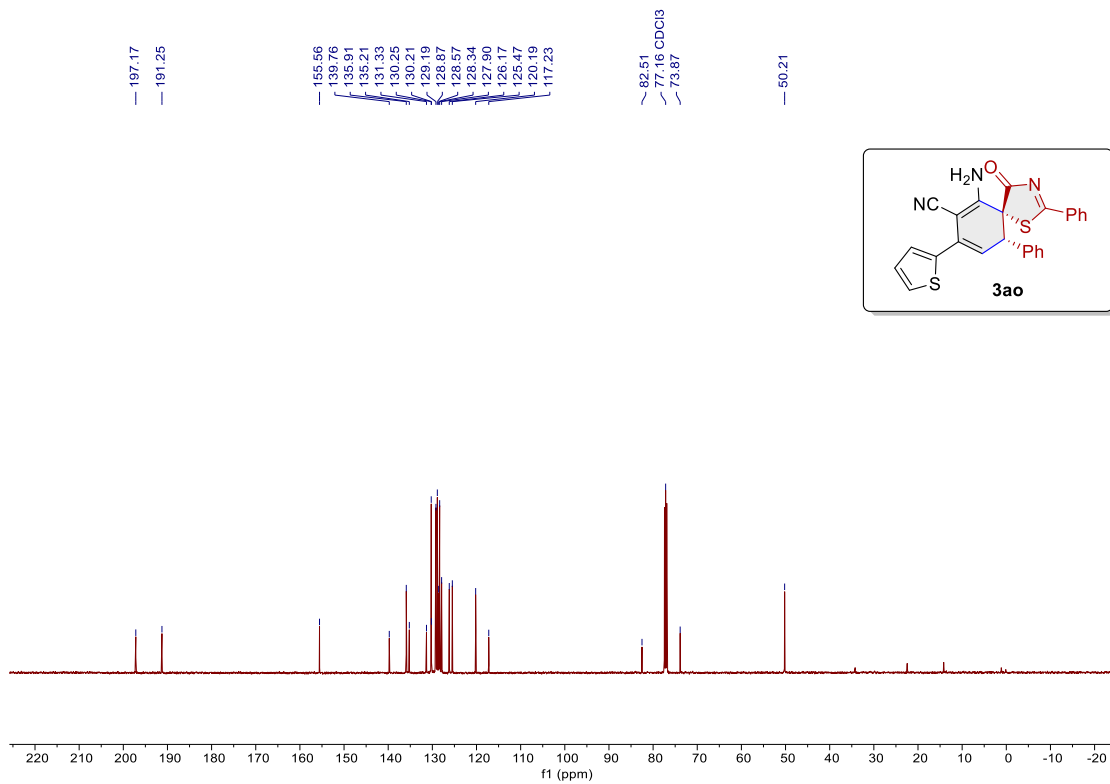

100 MHz <sup>13</sup>C{<sup>1</sup>H} NMR spectra of compound **3ao** in CDCl<sub>3</sub>

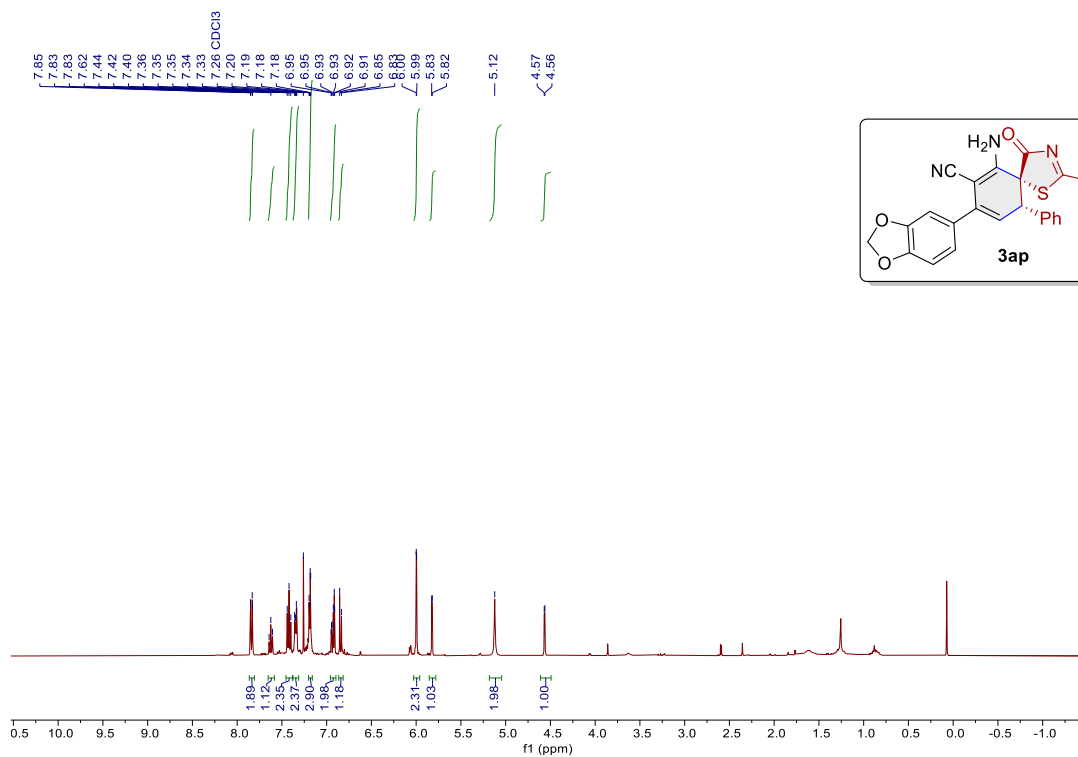

400 MHz <sup>1</sup>H NMR spectra of compound **3ap** in CDCl<sub>3</sub>

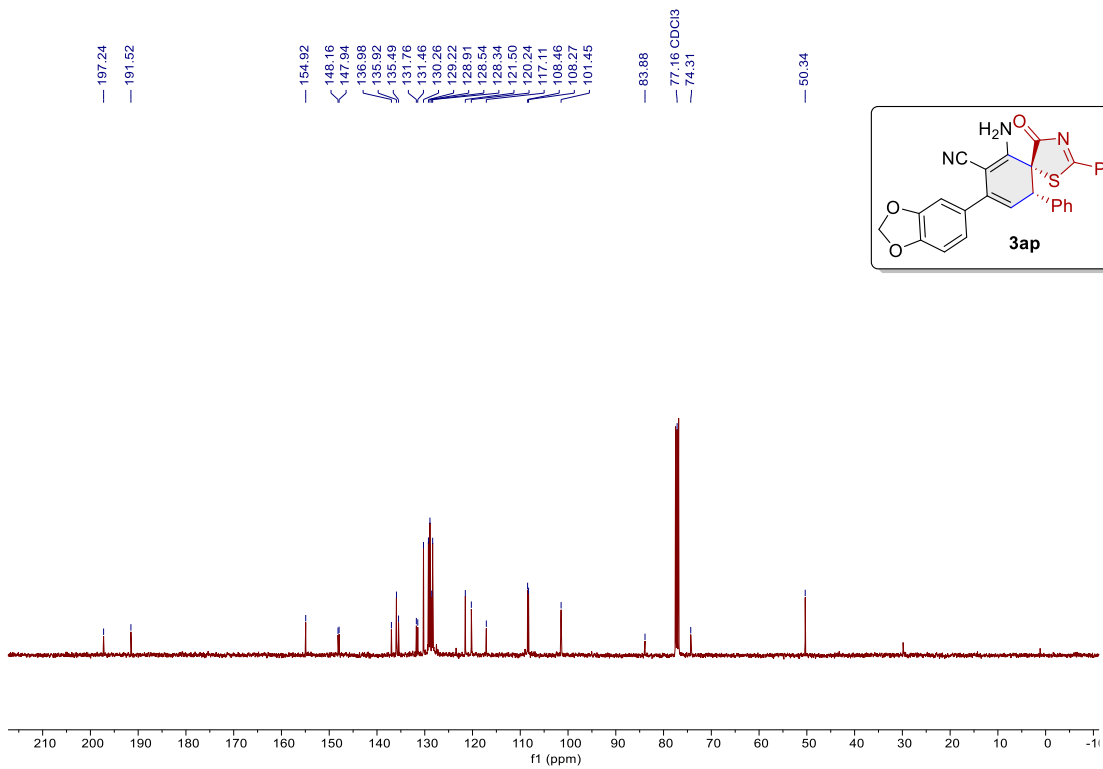

100 MHz <sup>13</sup>C{<sup>1</sup>H} NMR spectra of compound **3ap** in CDCl<sub>3</sub>



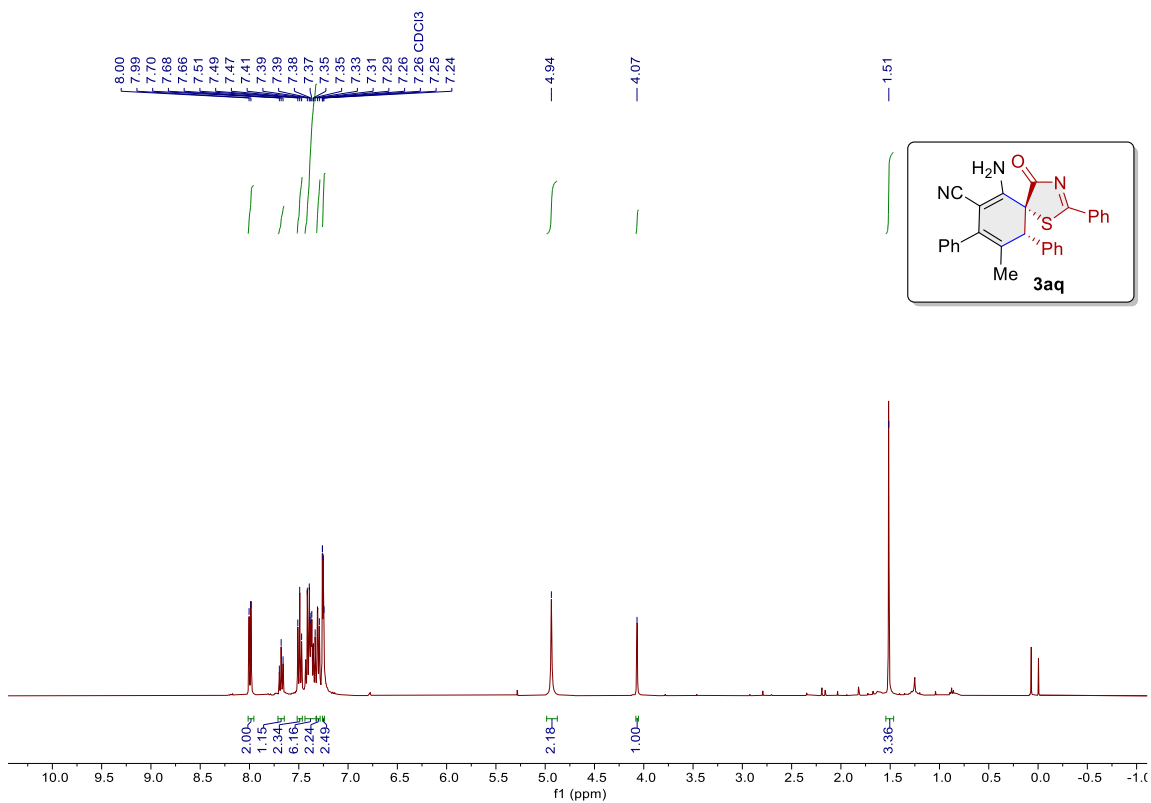

400 MHz  $^1\text{H}$  NMR spectra of compound **3aq** in  $\text{CDCl}_3$

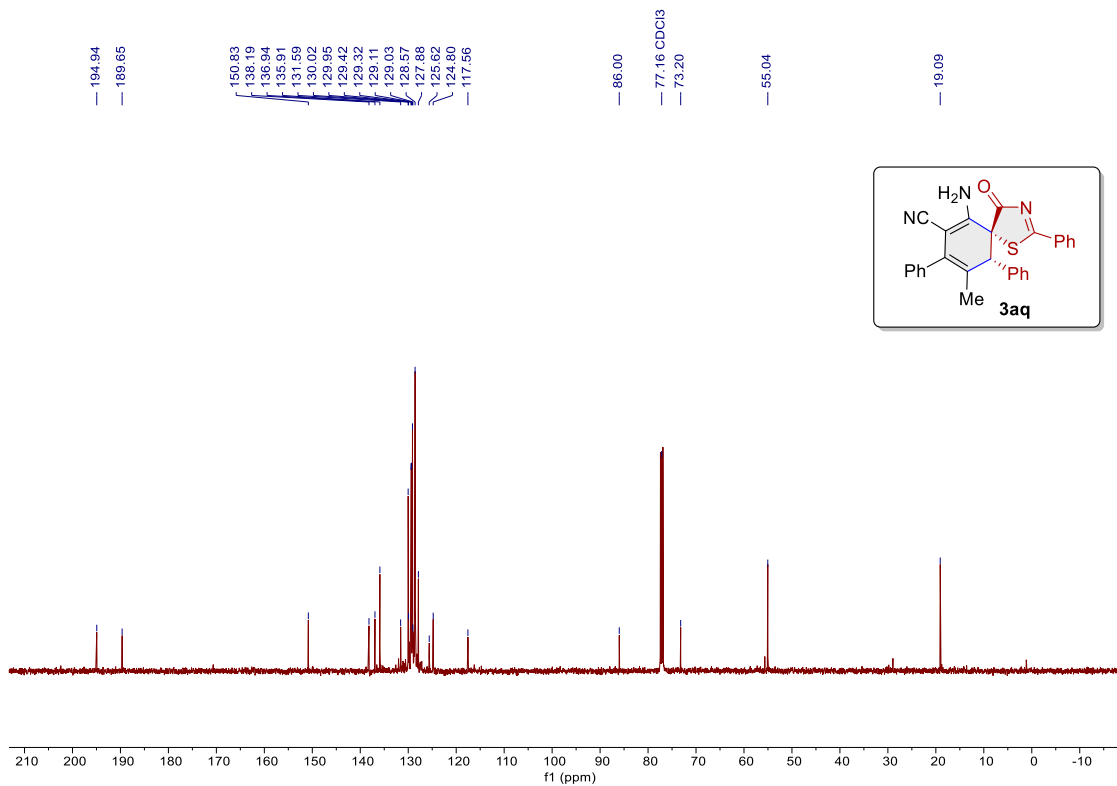

100 MHz  $^{13}\text{C}\{^1\text{H}\}$  NMR spectra of compound **3aq** in  $\text{CDCl}_3$

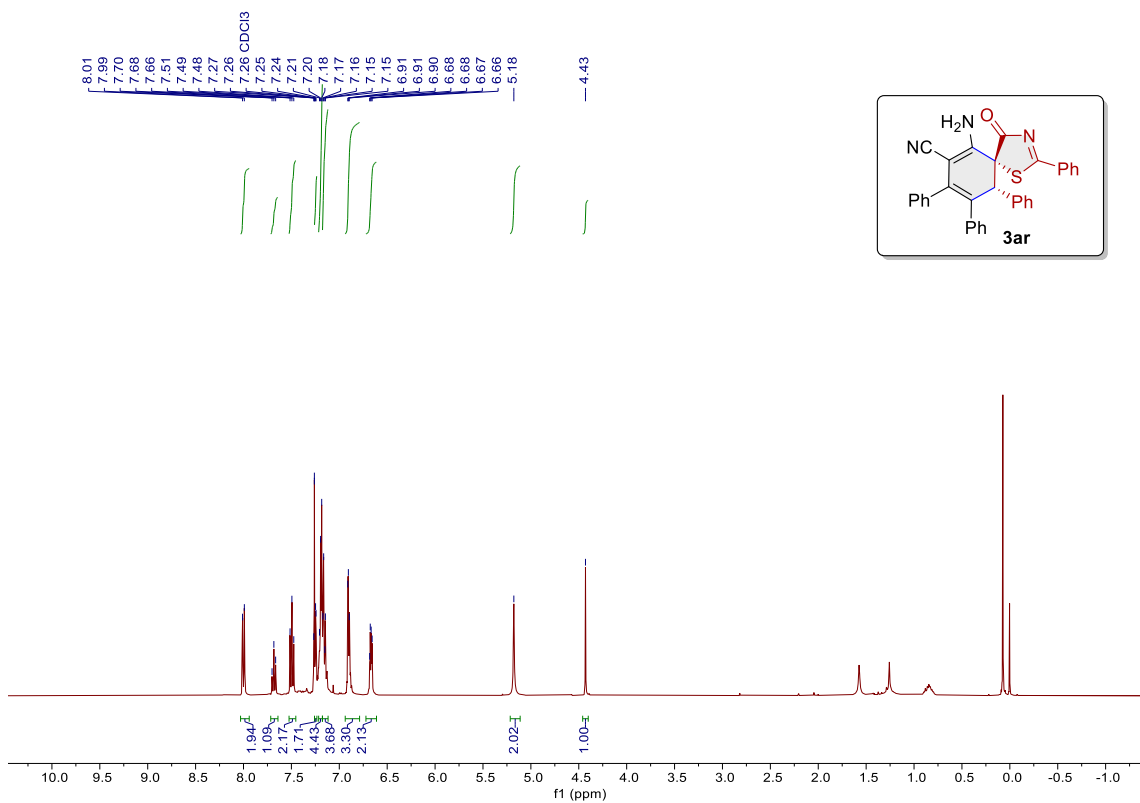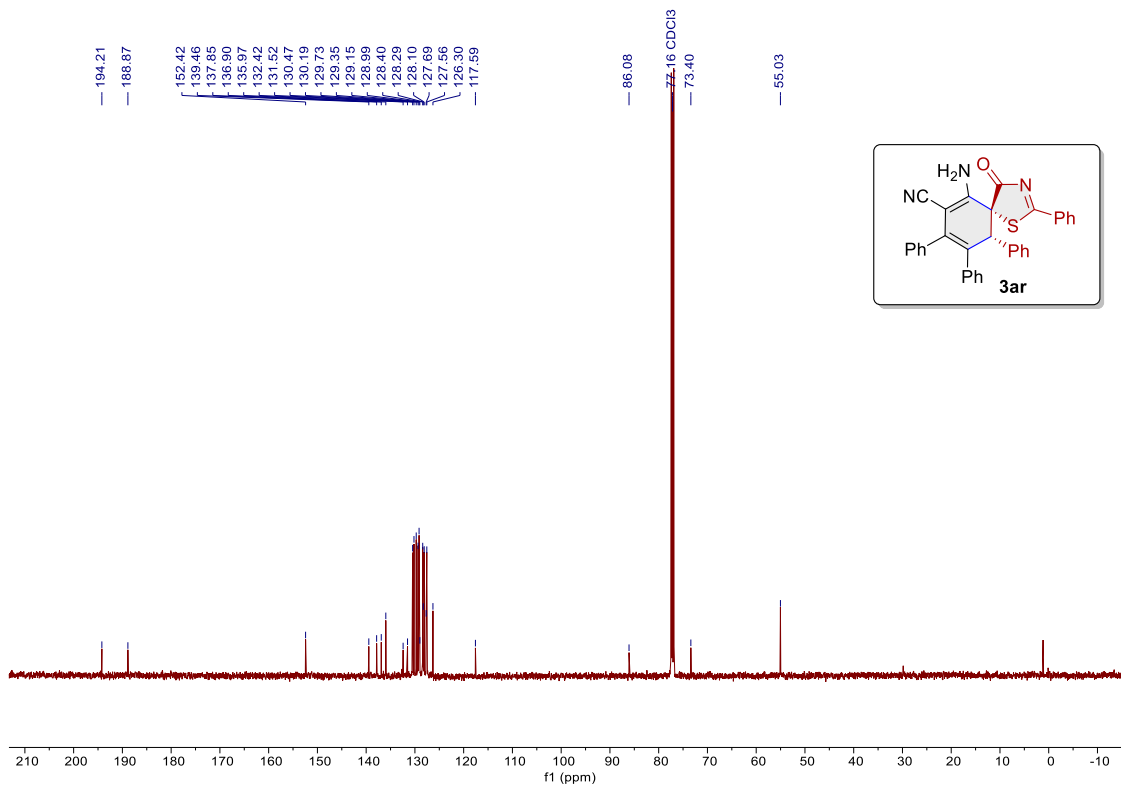

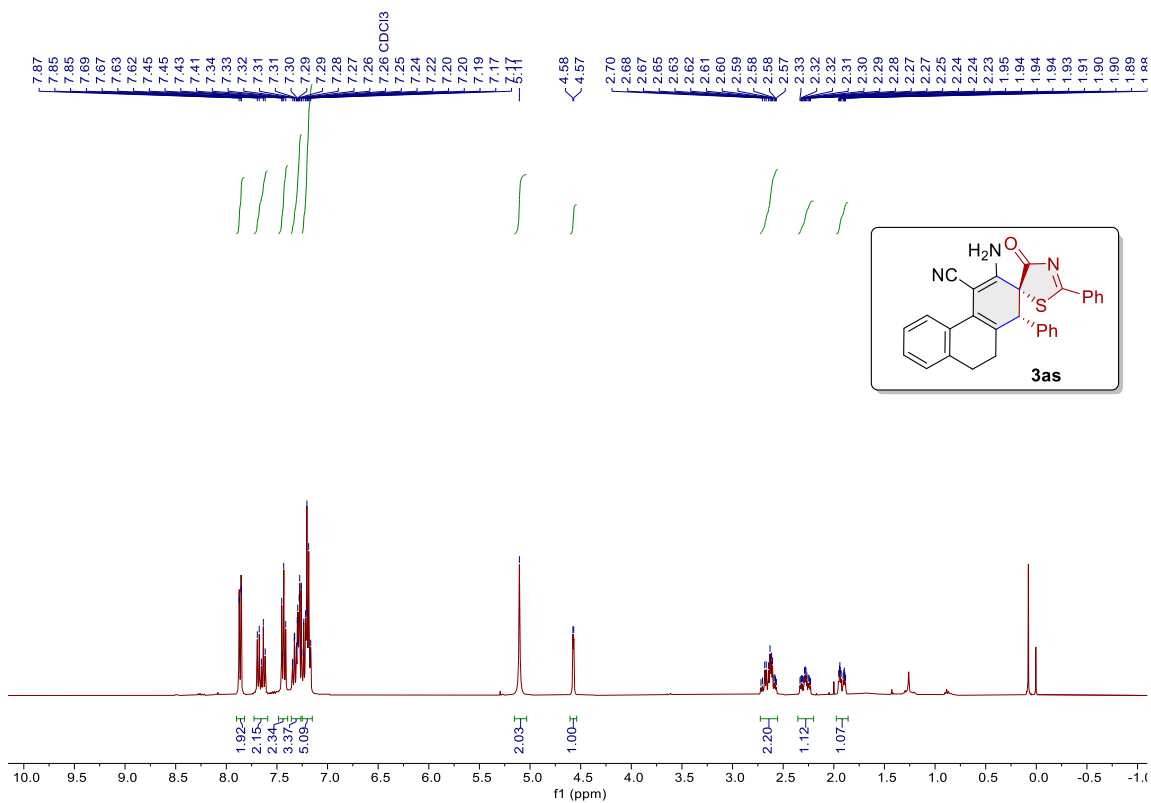

400 MHz  $^1\text{H}$  NMR spectra of compound **3as** in  $\text{CDCl}_3$

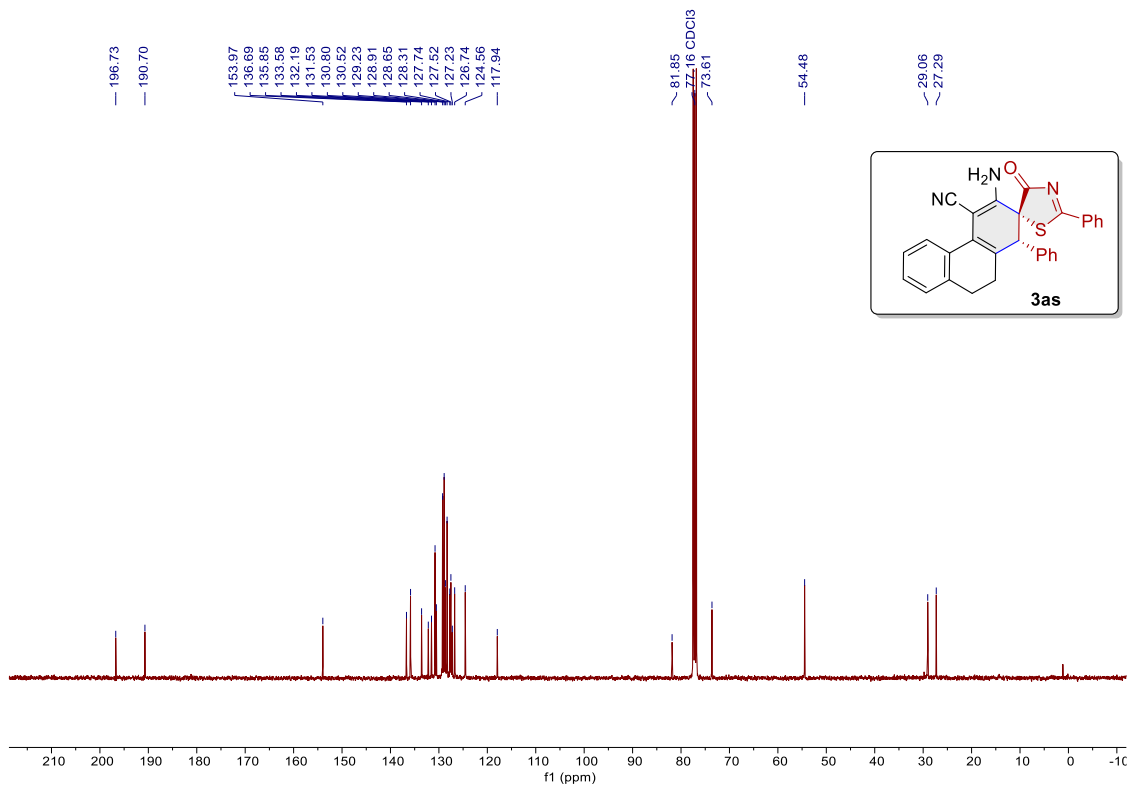

100 MHz  $^{13}\text{C}\{^1\text{H}\}$  NMR spectra of compound **3as** in  $\text{CDCl}_3$

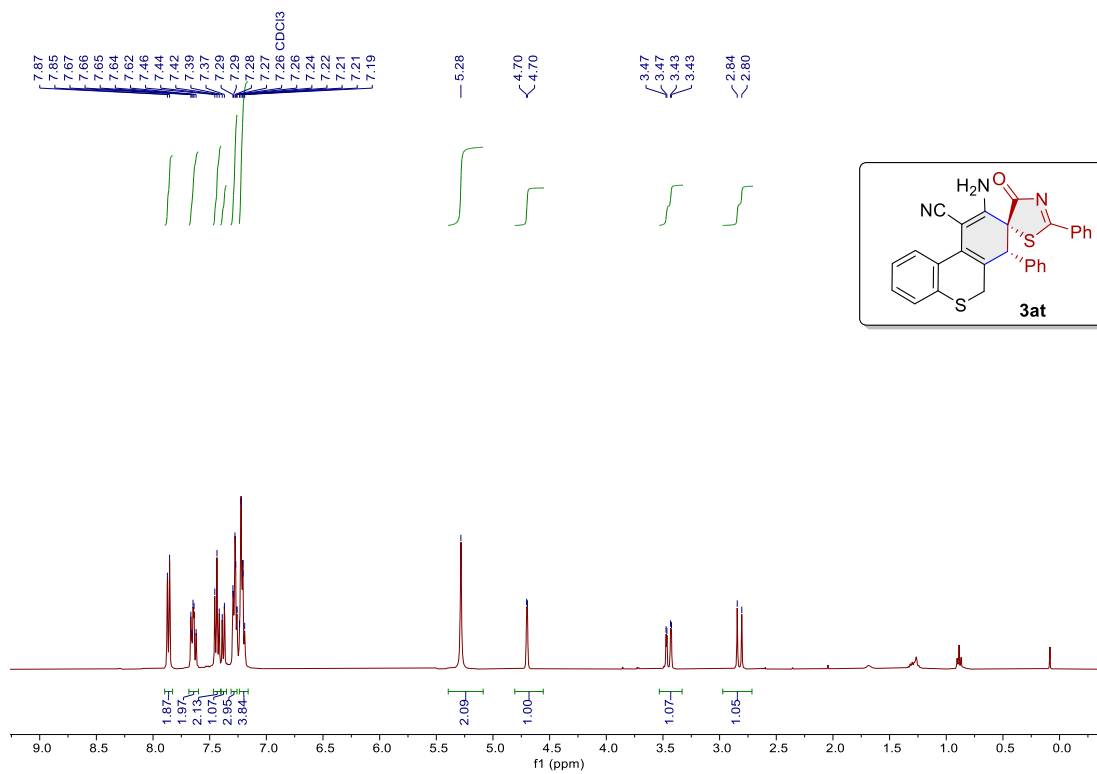

400 MHz <sup>1</sup>H NMR spectra of compound **3at** in CDCl<sub>3</sub>

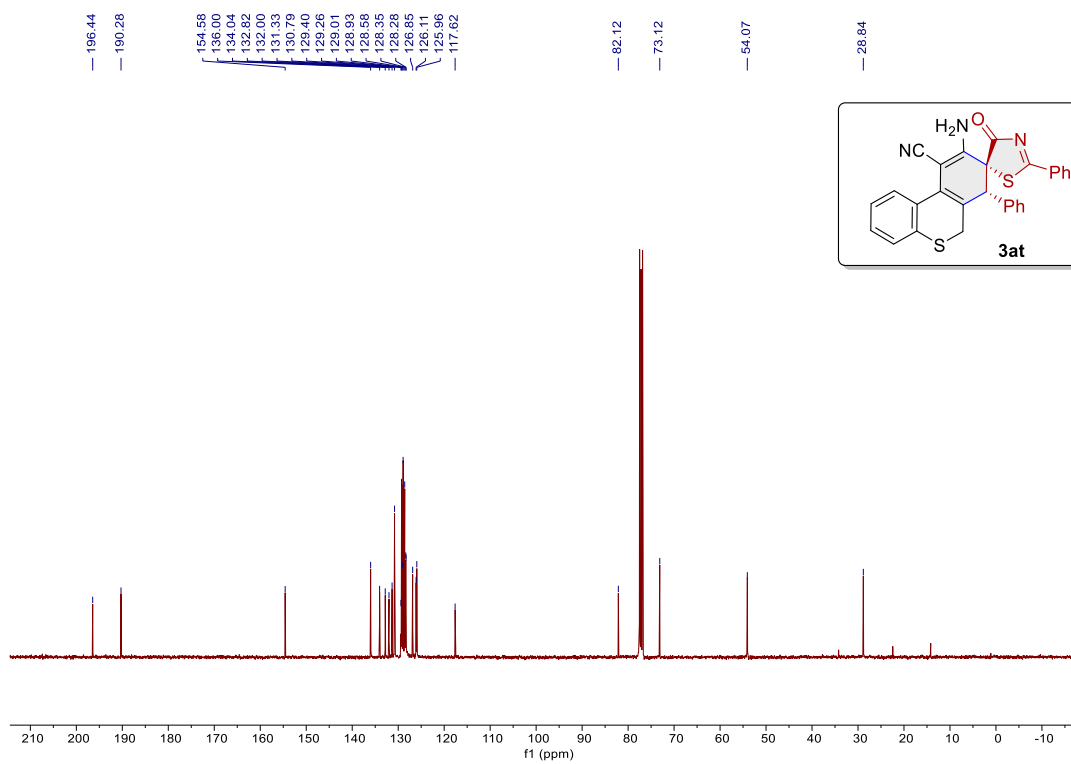

100 MHz <sup>13</sup>C{<sup>1</sup>H} NMR spectra of compound **3at** in CDCl<sub>3</sub>

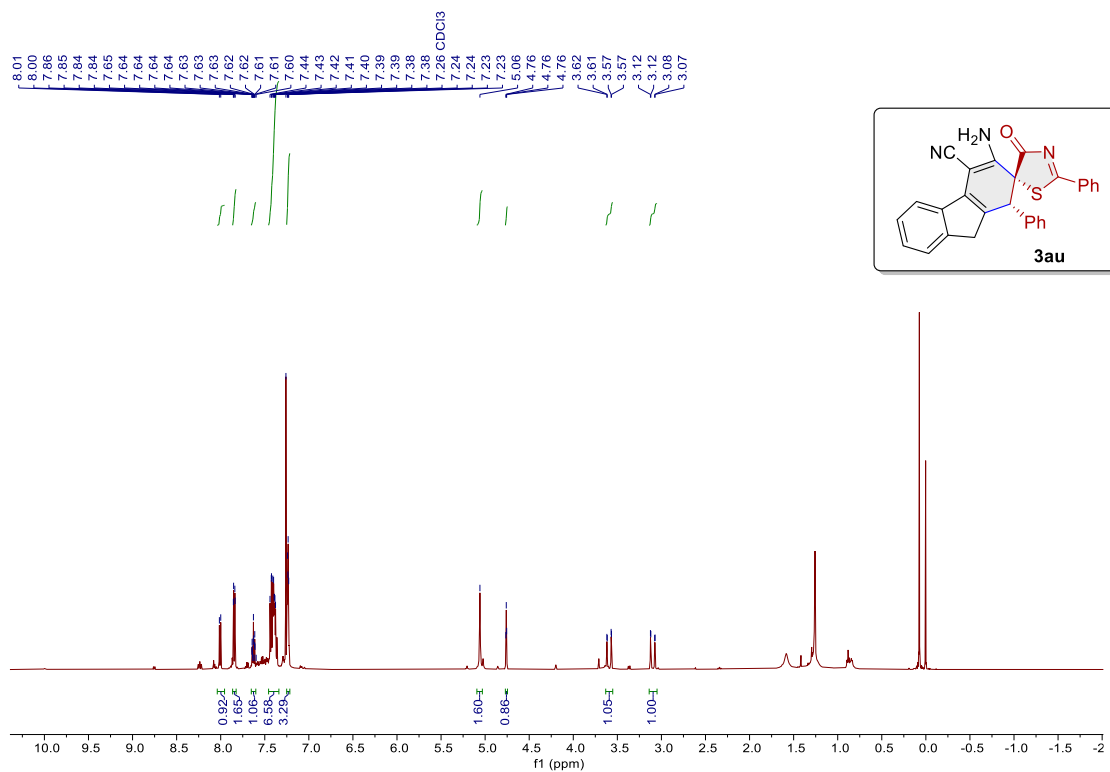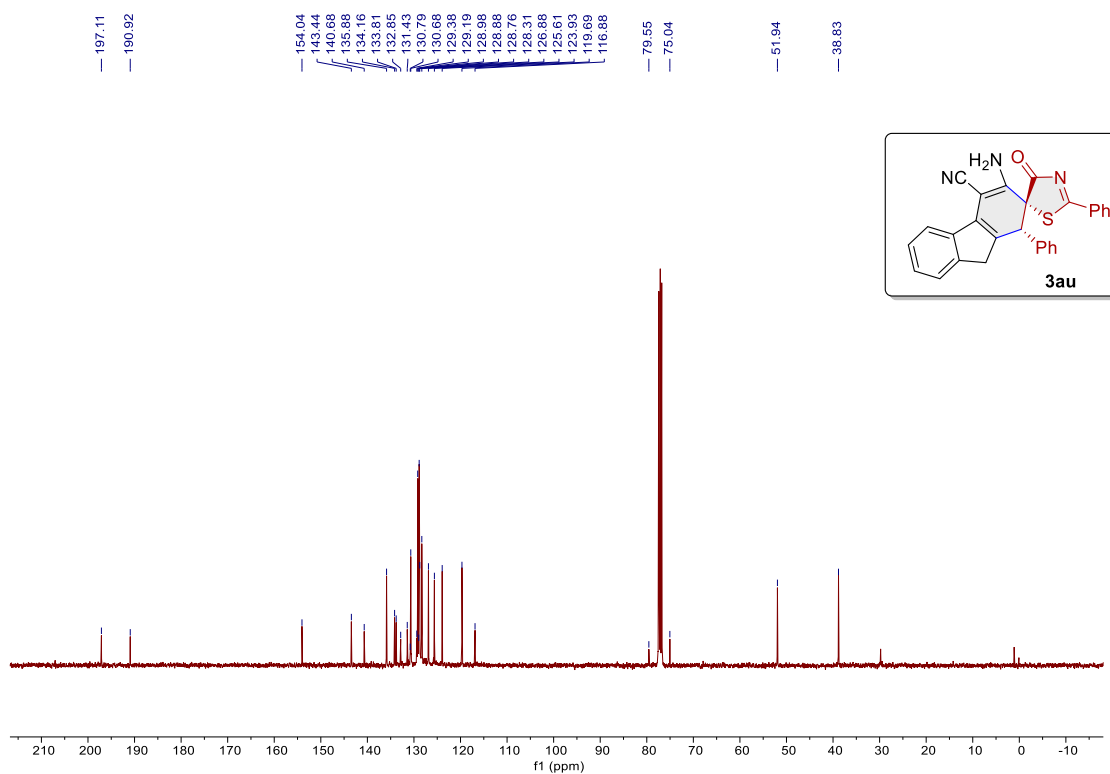

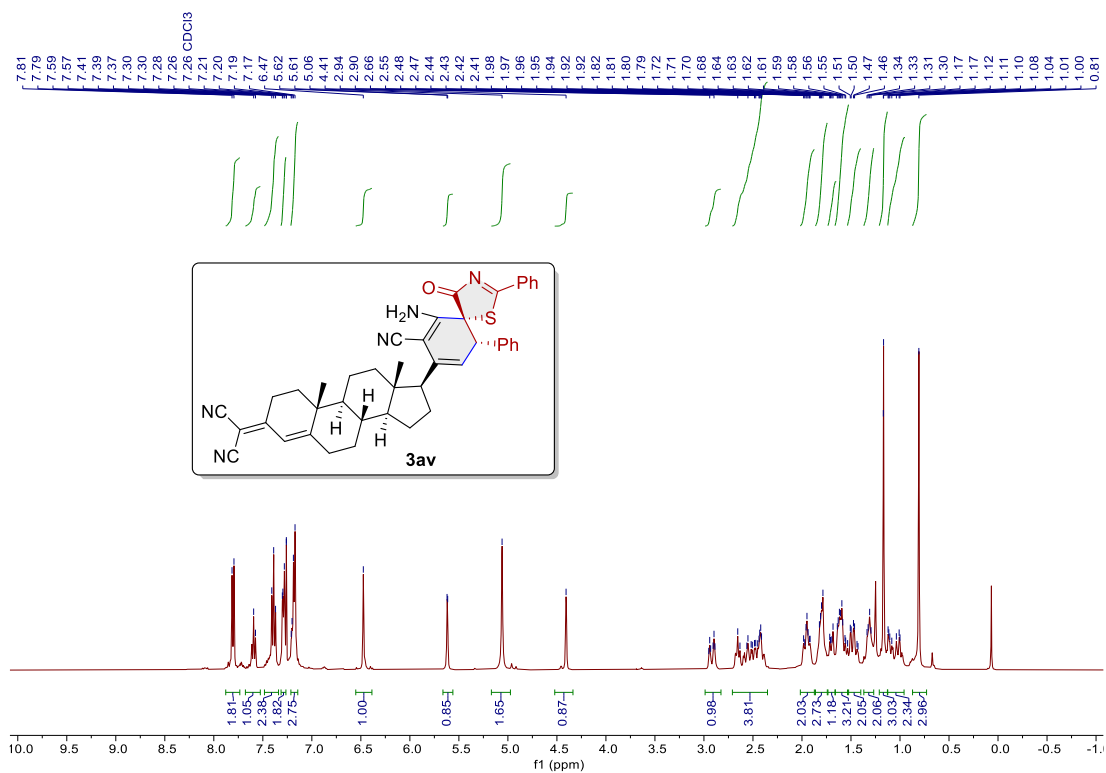

400 MHz  $^1\text{H}$  NMR spectra of compound **3av** in  $\text{CDCl}_3$

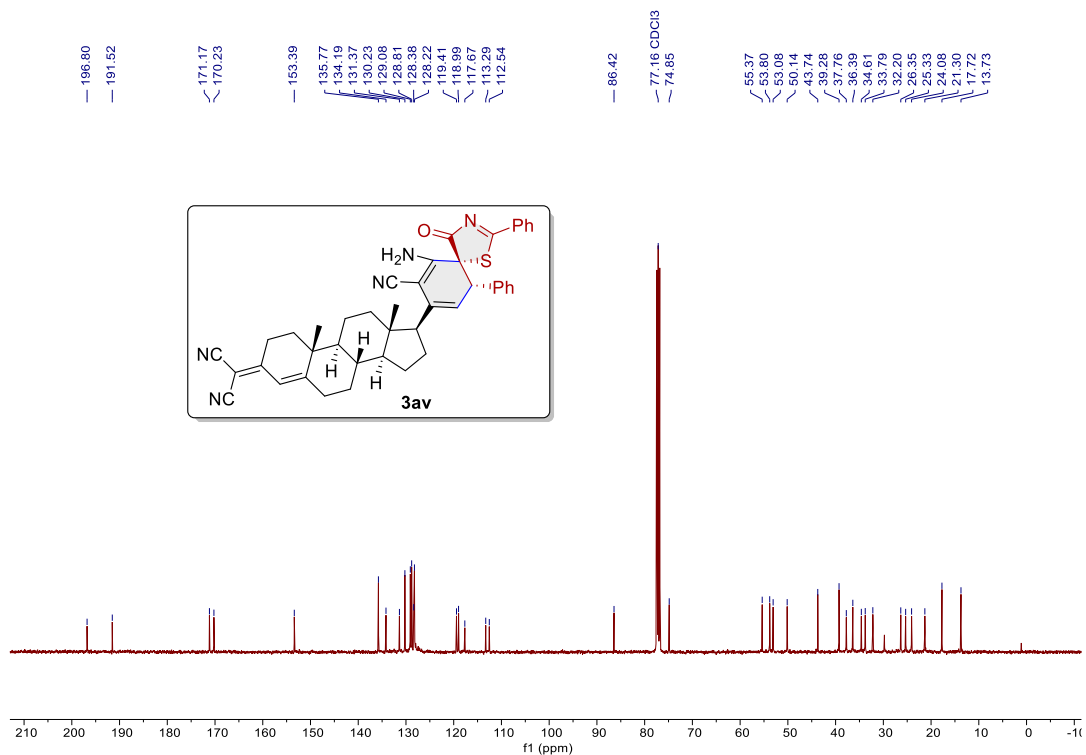

100 MHz  $^{13}\text{C}\{^1\text{H}\}$  NMR spectra of compound **3av** in  $\text{CDCl}_3$

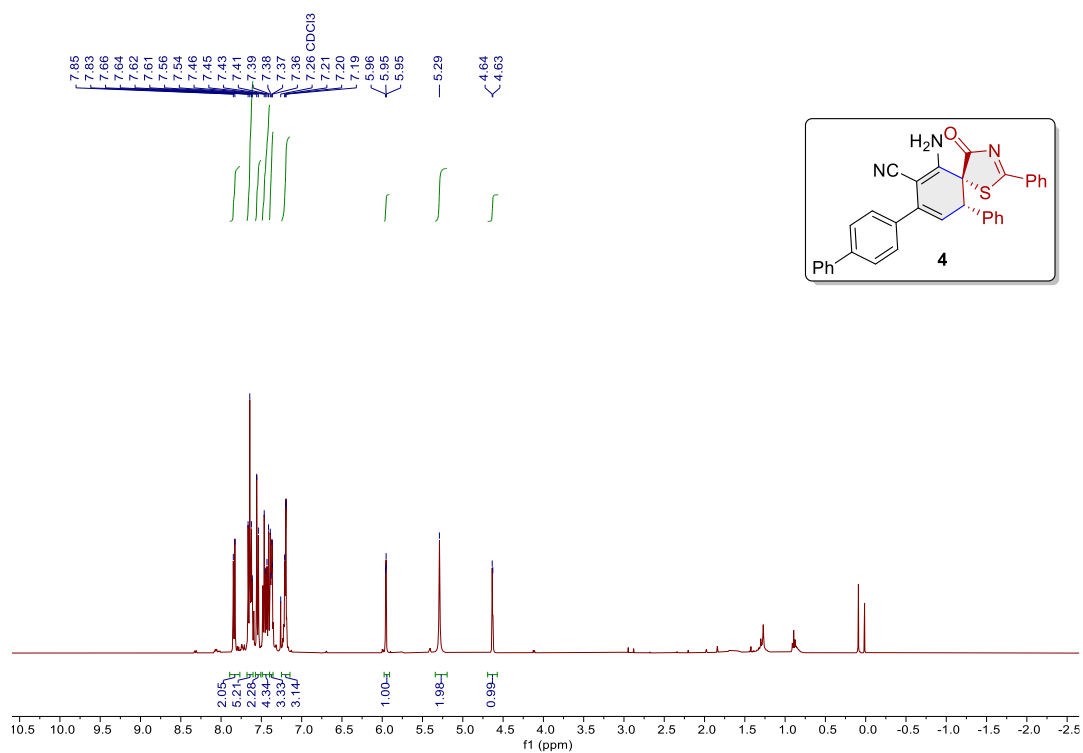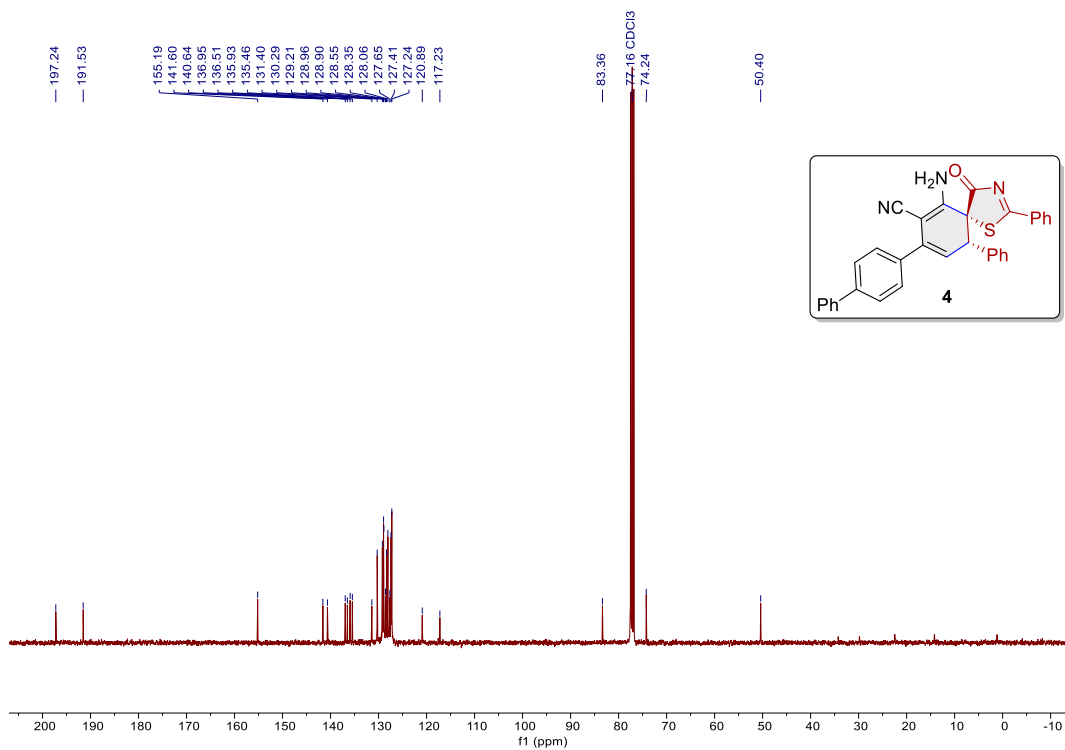

## HPLC spectra:

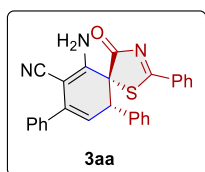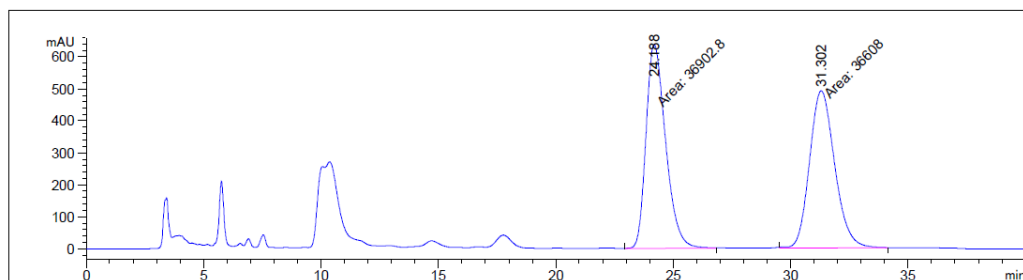

Signal 1: DAD1 B, Sig=254,4 Ref=off

| Peak # | RetTime [min] | Type | Width [min] | Area [mAU*s] | Height [mAU] | Area %  |
|--------|---------------|------|-------------|--------------|--------------|---------|
| 1      | 24.188        | MF   | 0.9657      | 3.69028e4    | 636.90961    | 50.2005 |
| 2      | 31.302        | MF   | 1.2420      | 3.66080e4    | 491.23166    | 49.7995 |

HPLC chromatogram of racemic **3aa**

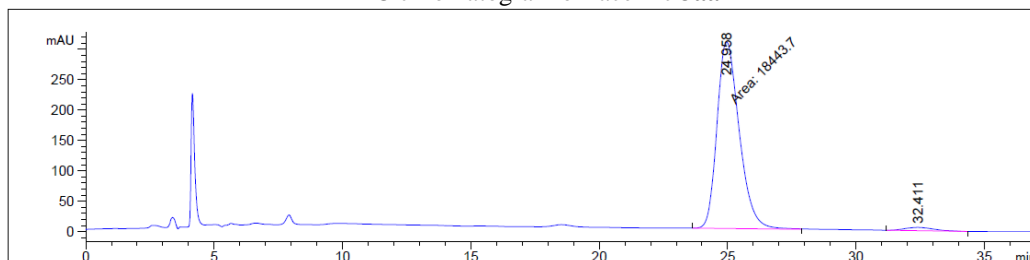

Signal 1: DAD1 B, Sig=254,4 Ref=off

| Peak # | RetTime [min] | Type | Width [min] | Area [mAU*s] | Height [mAU] | Area %  |
|--------|---------------|------|-------------|--------------|--------------|---------|
| 1      | 24.958        | MF   | 1.0007      | 1.84437e4    | 307.19296    | 97.7952 |
| 2      | 32.411        | BB   | 0.9151      | 415.82068    | 5.37157      | 2.2048  |

HPLC chromatogram of enantioenriched **3aa**

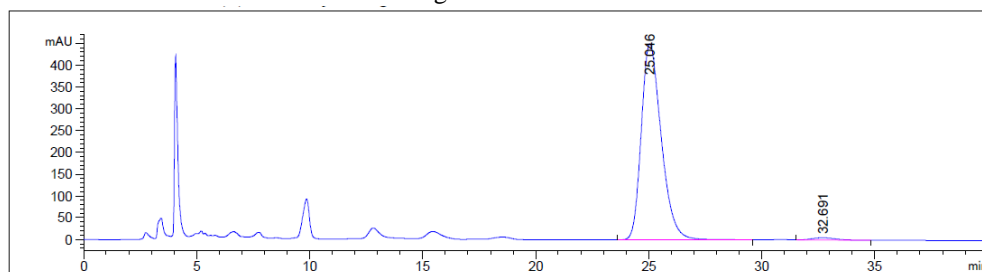

Signal 1: DAD1 B, Sig=254,4 Ref=off

| Peak # | RetTime [min] | Type | Width [min] | Area [mAU*s] | Height [mAU] | Area %  |
|--------|---------------|------|-------------|--------------|--------------|---------|
| 1      | 25.046        | BB   | 0.9419      | 2.75970e4    | 449.71899    | 98.5956 |
| 2      | 32.691        | BB   | 0.8866      | 393.10608    | 5.24392      | 1.4044  |

HPLC chromatogram of enantioenriched **3aa** (scale-up)



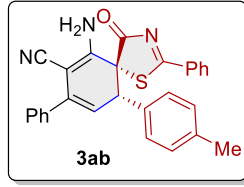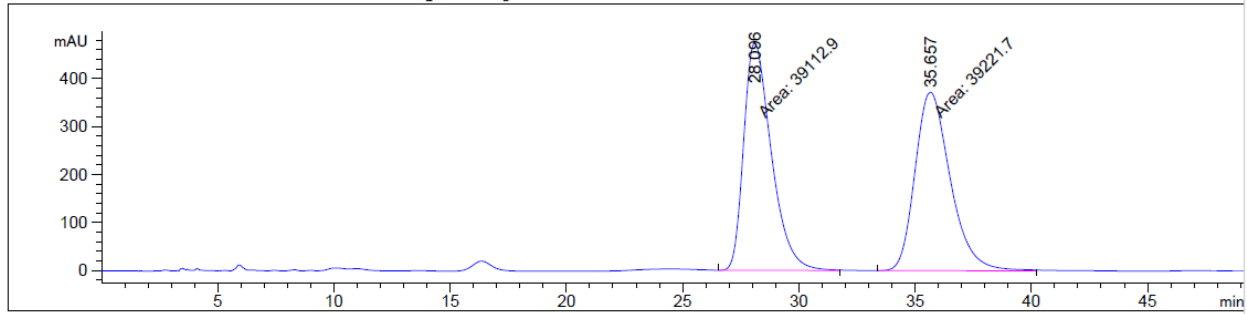

HPLC chromatogram of racemic **3ab**

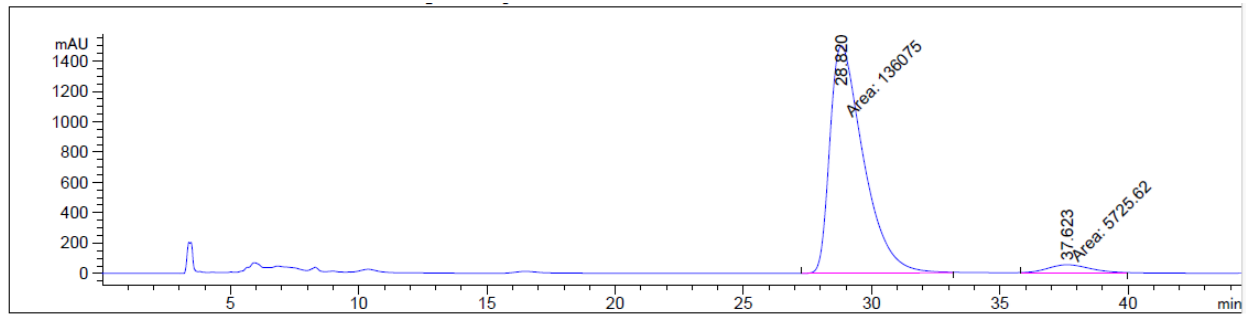

HPLC chromatogram of enantioenriched **3ab**

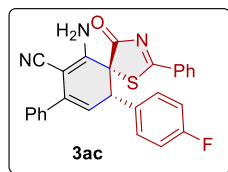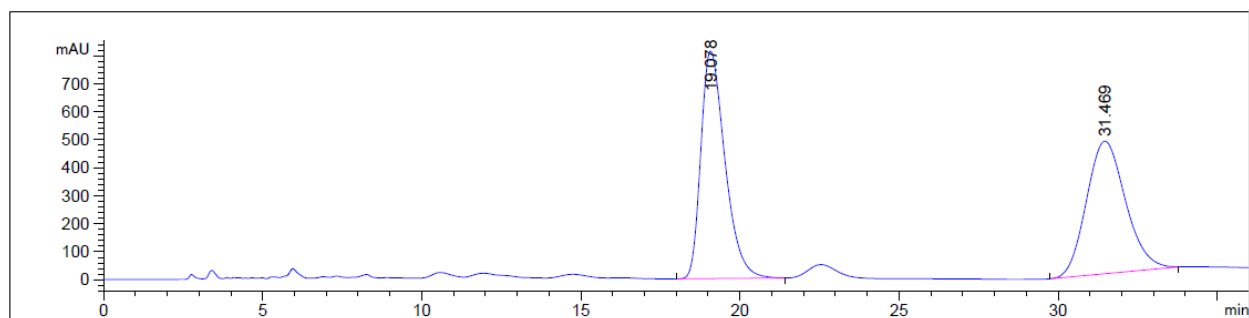

| Peak # | RetTime [min] | Type | Width [min] | Area [mAU*s] | Height [mAU] | Area %  |
|--------|---------------|------|-------------|--------------|--------------|---------|
| 1      | 19.078        | BB   | 0.8083      | 4.28006e4    | 812.86743    | 51.4282 |
| 2      | 31.469        | BB   | 1.3195      | 4.04233e4    | 473.74359    | 48.5718 |

HPLC chromatogram of racemic **3ac**

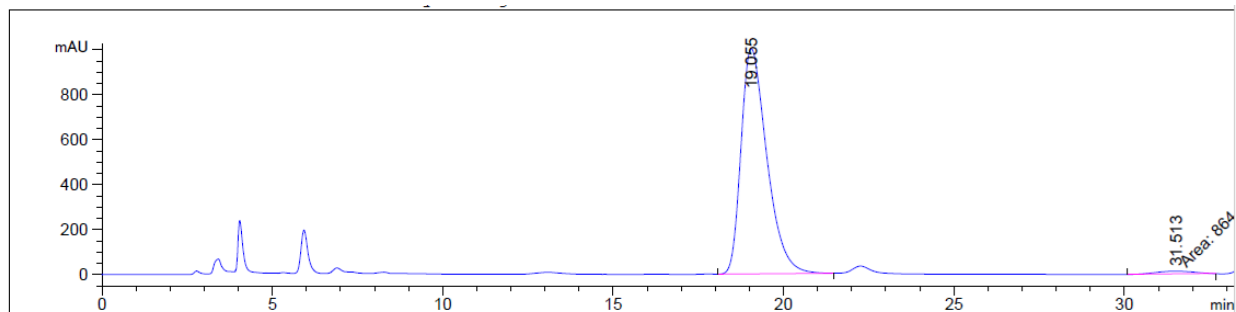

| Peak # | RetTime [min] | Type | Width [min] | Area [mAU*s] | Height [mAU] | Area %  |
|--------|---------------|------|-------------|--------------|--------------|---------|
| 1      | 19.055        | BB   | 0.8083      | 5.27711e4    | 1002.16754   | 98.3883 |
| 2      | 31.513        | MM   | 0.8865      | 864.41809    | 12.05620     | 1.6117  |

HPLC chromatogram of enantioenriched **3ac**

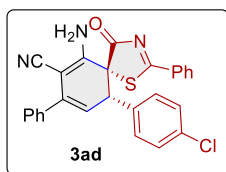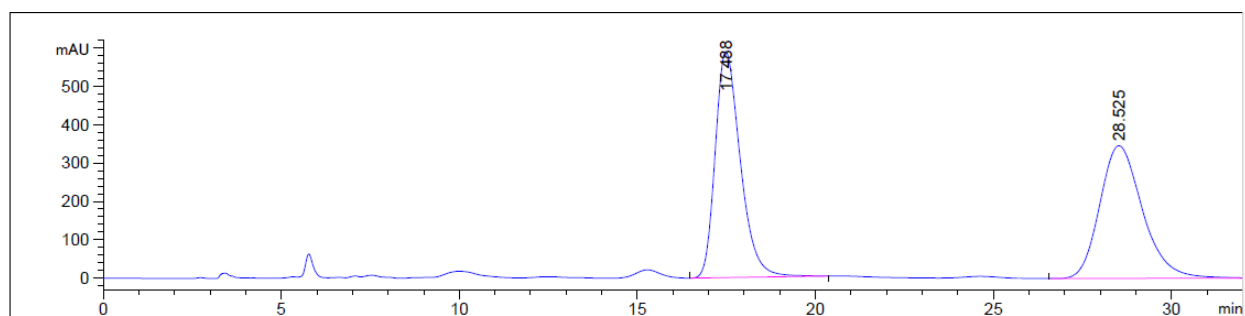

Signal 1: DAD1 B, Sig=254,4 Ref=off

| Peak # | RetTime [min] | Type | Width [min] | Area [mAU*s] | Height [mAU] | Area %  |
|--------|---------------|------|-------------|--------------|--------------|---------|
| 1      | 17.488        | BB   | 0.7526      | 2.89654e4    | 590.15472    | 50.0213 |
| 2      | 28.525        | BB   | 1.2742      | 2.89407e4    | 346.58884    | 49.9787 |

HPLC chromatogram of racemic **3ad**

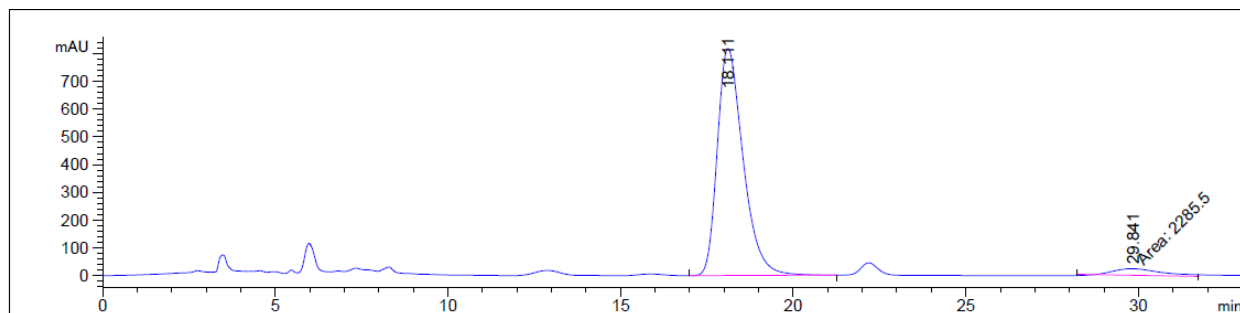

Signal 1: DAD1 B, Sig=254,4 Ref=off

| Peak # | RetTime [min] | Type | Width [min] | Area [mAU*s] | Height [mAU] | Area %  |
|--------|---------------|------|-------------|--------------|--------------|---------|
| 1      | 18.111        | BB   | 0.7976      | 4.24027e4    | 816.84729    | 94.8857 |
| 2      | 29.841        | MM   | 1.6268      | 2285.49585   | 23.41451     | 5.1143  |

HPLC chromatogram of enantioenriched **3ad**

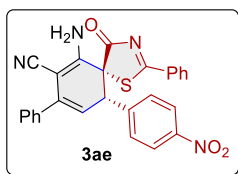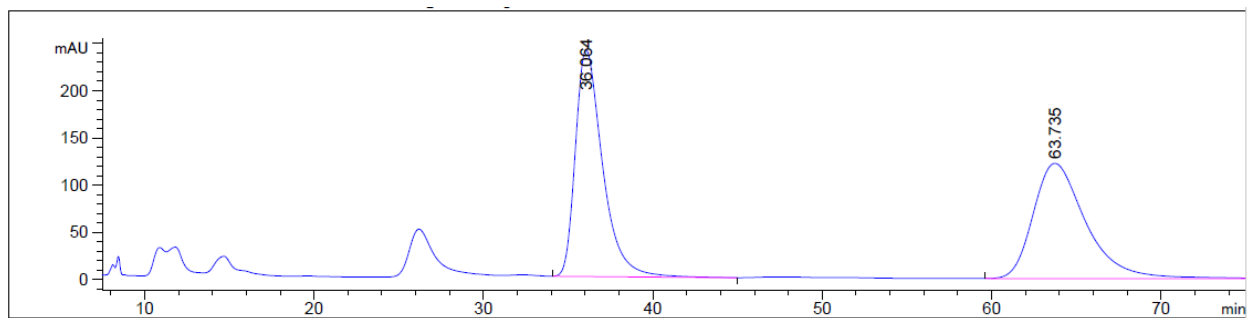

Signal 1: DAD1 B, Sig=254,4 Ref=off

| Peak # | RetTime [min] | Type | Width [min] | Area [mAU*s] | Height [mAU] | Area %  |
|--------|---------------|------|-------------|--------------|--------------|---------|
| 1      | 36.064        | BB   | 1.6623      | 2.68470e4    | 240.13925    | 50.2283 |
| 2      | 63.735        | BB   | 2.5565      | 2.66029e4    | 122.07000    | 49.7717 |

HPLC chromatogram of racemic **3ae**

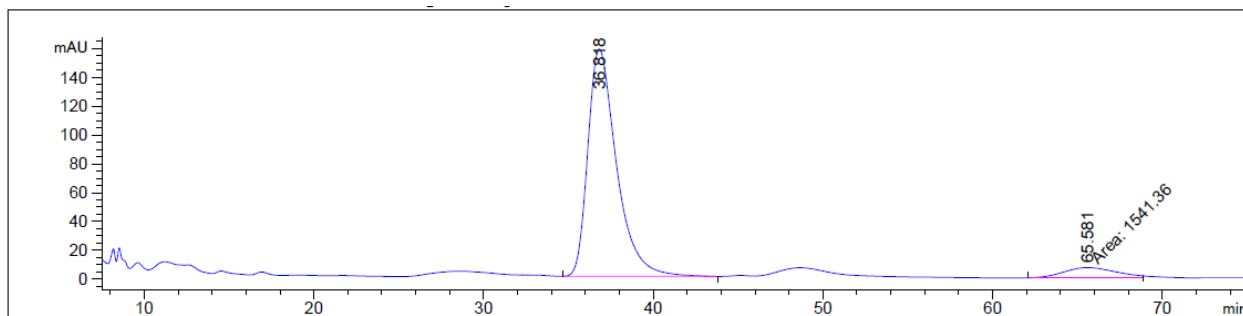

Signal 1: DAD1 B, Sig=254,4 Ref=off

| Peak # | RetTime [min] | Type | Width [min] | Area [mAU*s] | Height [mAU] | Area %  |
|--------|---------------|------|-------------|--------------|--------------|---------|
| 1      | 36.818        | BB   | 1.7353      | 1.85507e4    | 157.82019    | 92.3285 |
| 2      | 65.581        | MF   | 3.5953      | 1541.36450   | 7.14529      | 7.6715  |

HPLC chromatogram of enantioenriched **3ae**

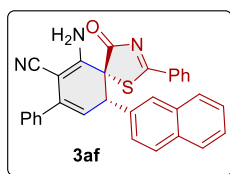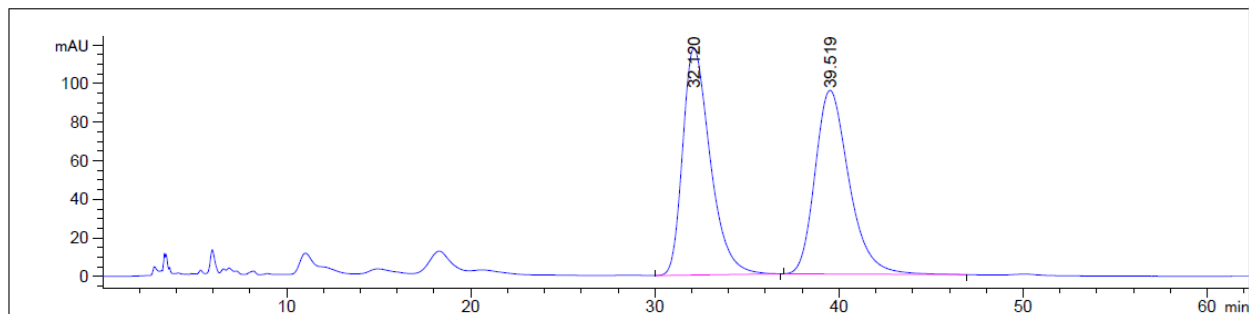

Signal 1: DAD1 B, Sig=254,4 Ref=off

| Peak # | RetTime [min] | Type | Width [min] | Area [mAU*s] | Height [mAU] | Area %  |
|--------|---------------|------|-------------|--------------|--------------|---------|
| 1      | 32.120        | BB   | 1.5401      | 1.22461e4    | 117.87425    | 50.0047 |
| 2      | 39.519        | BB   | 1.8307      | 1.22438e4    | 95.31220     | 49.9953 |

HPLC chromatogram of racemic **3af**

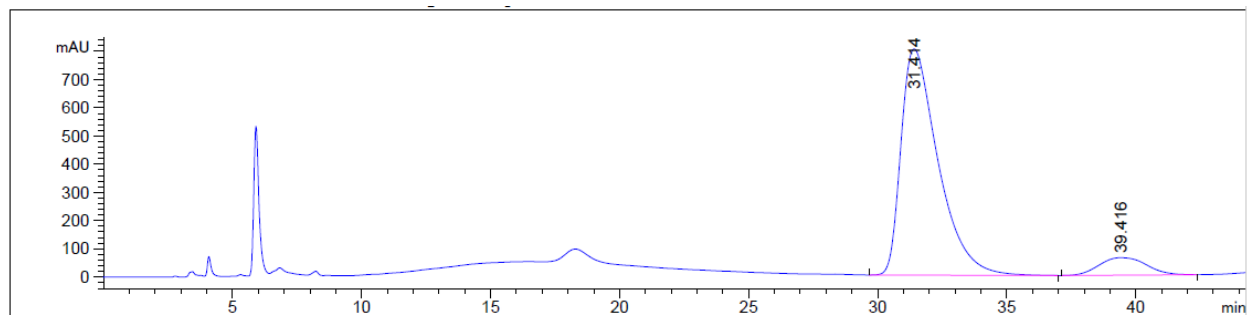

Signal 1: DAD1 B, Sig=254,4 Ref=off

| Peak # | RetTime [min] | Type | Width [min] | Area [mAU*s] | Height [mAU] | Area %  |
|--------|---------------|------|-------------|--------------|--------------|---------|
| 1      | 31.414        | BB   | 1.5081      | 7.99681e4    | 801.47815    | 91.0520 |
| 2      | 39.416        | BB   | 1.7067      | 7858.72266   | 62.00407     | 8.9480  |

HPLC chromatogram of enantioenriched **3af**

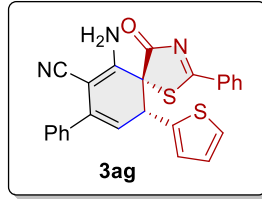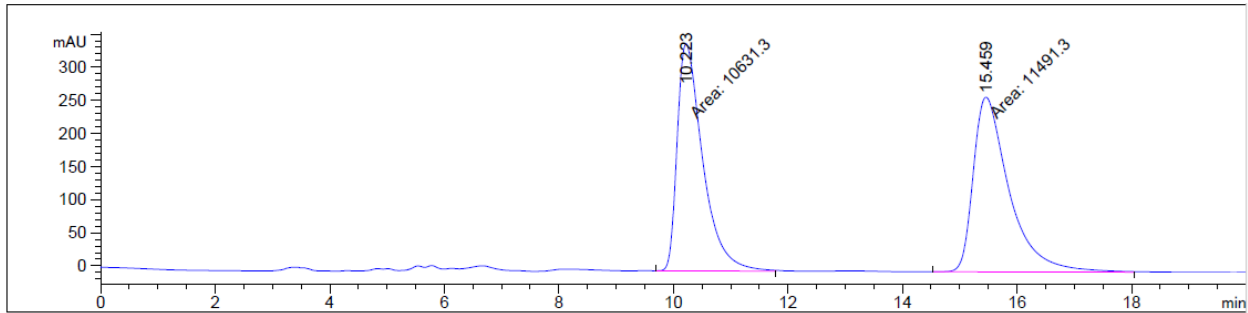

HPLC chromatogram of racemic **3ag**

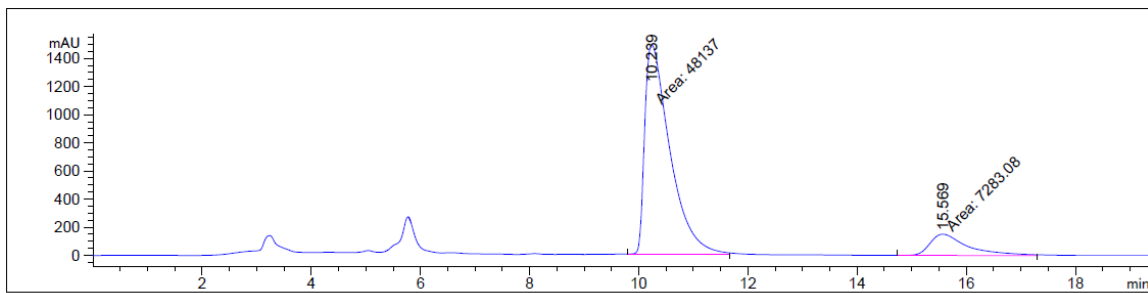

HPLC chromatogram of enantioenriched **3ag**

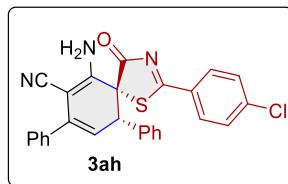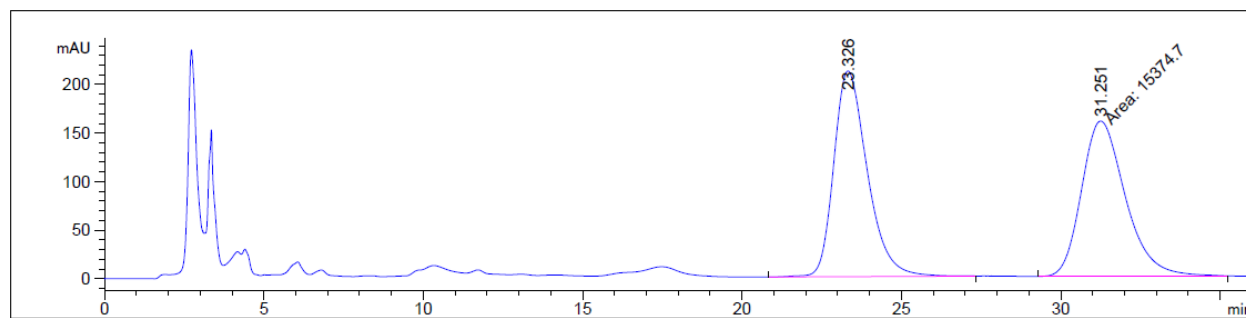

Signal 1: DAD1 B, Sig=254,4 Ref=off

| Peak # | RetTime [min] | Type | Width [min] | Area [mAU*s] | Height [mAU] | Area %  |
|--------|---------------|------|-------------|--------------|--------------|---------|
| 1      | 23.326        | BB   | 1.1181      | 1.54737e4    | 211.85439    | 50.1605 |
| 2      | 31.251        | MF   | 1.6006      | 1.53747e4    | 160.09740    | 49.8395 |

HPLC chromatogram of racemic **3ah**

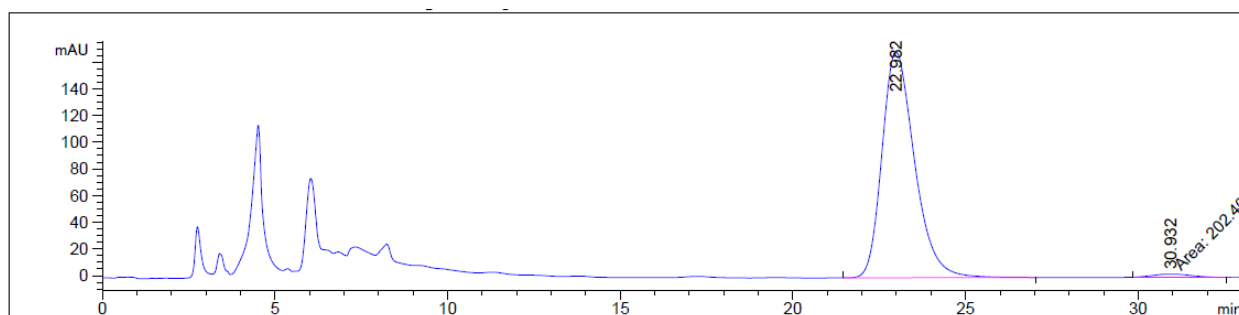

Signal 1: DAD1 B, Sig=254,4 Ref=off

| Peak # | RetTime [min] | Type | Width [min] | Area [mAU*s] | Height [mAU] | Area %  |
|--------|---------------|------|-------------|--------------|--------------|---------|
| 1      | 22.982        | BB   | 0.9943      | 1.10906e4    | 169.30002    | 98.2077 |
| 2      | 30.932        | MM   | 1.3216      | 202.40193    | 2.55253      | 1.7923  |

HPLC chromatogram of enantioenriched **3ah**

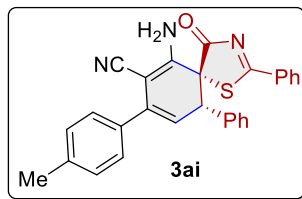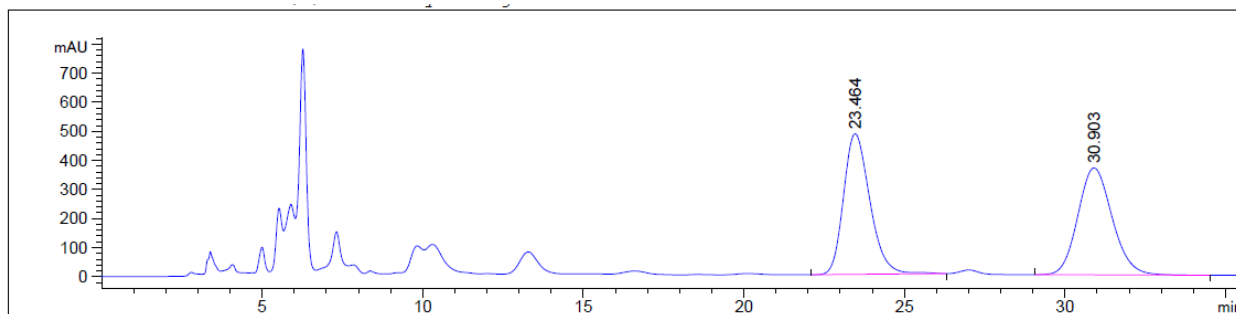

Signal 1: DAD1 B, Sig=254,4 Ref=off

| Peak # | RetTime [min] | Type | Width [min] | Area [mAU*s] | Height [mAU] | Area %  |
|--------|---------------|------|-------------|--------------|--------------|---------|
| 1      | 23.464        | BB   | 0.8787      | 2.75781e4    | 484.02240    | 50.2476 |
| 2      | 30.903        | BB   | 1.1442      | 2.73062e4    | 367.78412    | 49.7524 |

HPLC chromatogram of racemic **3ai**

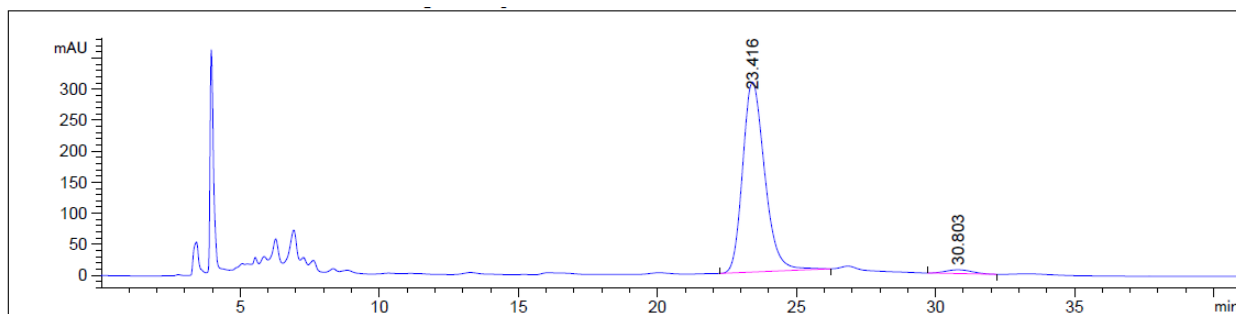

Signal 1: DAD1 B, Sig=254,4 Ref=off

| Peak # | RetTime [min] | Type | Width [min] | Area [mAU*s] | Height [mAU] | Area %  |
|--------|---------------|------|-------------|--------------|--------------|---------|
| 1      | 23.416        | BB   | 0.8460      | 1.68705e4    | 306.55765    | 97.7075 |
| 2      | 30.803        | BB   | 0.7783      | 395.83395    | 6.07392      | 2.2925  |

HPLC chromatogram of enantioenriched **3ai**



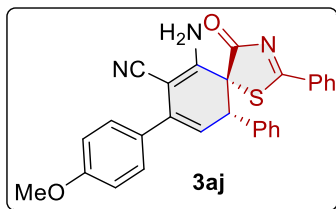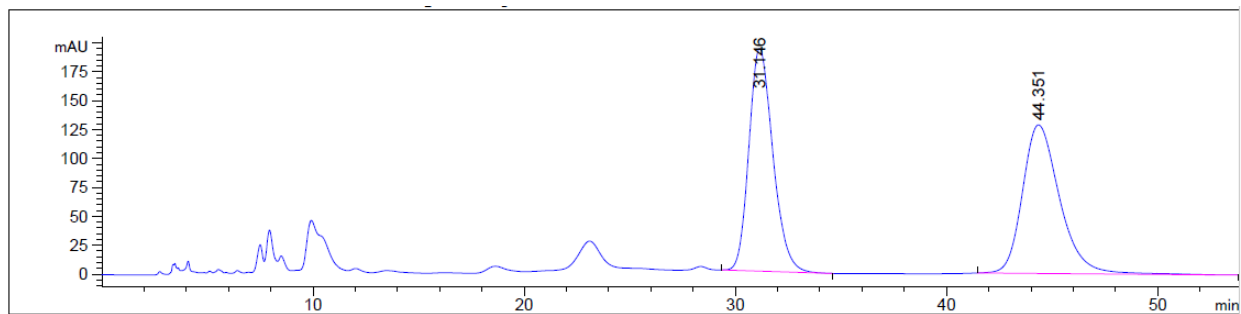

Signal 1: DAD1 B, Sig=254,4 Ref=off

| Peak # | RetTime [min] | Type | Width [min] | Area [mAU*s] | Height [mAU] | Area %  |
|--------|---------------|------|-------------|--------------|--------------|---------|
| 1      | 31.146        | BB   | 1.2055      | 1.51911e4    | 192.31912    | 49.1216 |
| 2      | 44.351        | BBA  | 1.7238      | 1.57344e4    | 128.39061    | 50.8784 |

HPLC chromatogram of racemic **3aj**

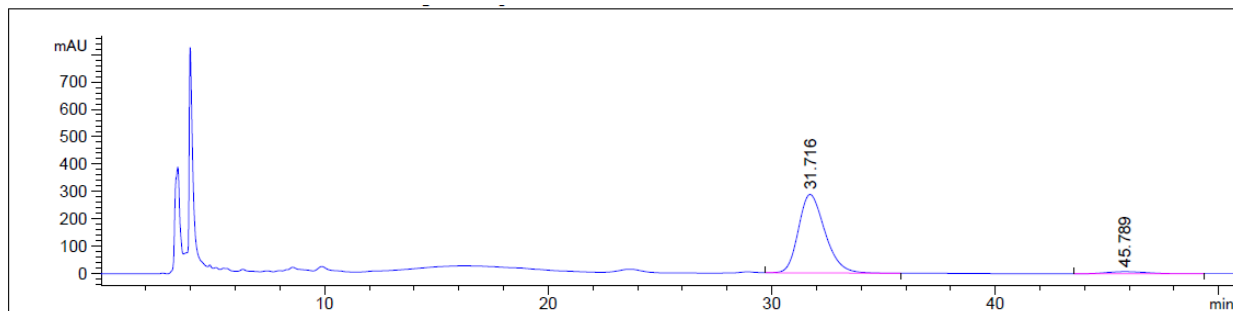

Signal 1: DAD1 B, Sig=254,4 Ref=off

| Peak # | RetTime [min] | Type | Width [min] | Area [mAU*s] | Height [mAU] | Area %  |
|--------|---------------|------|-------------|--------------|--------------|---------|
| 1      | 31.716        | BB   | 1.2552      | 2.35700e4    | 286.09360    | 95.9107 |
| 2      | 45.789        | BB   | 1.5024      | 1004.93823   | 7.89837      | 4.0893  |

HPLC chromatogram of enantioenriched **3aj**

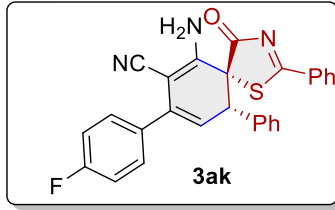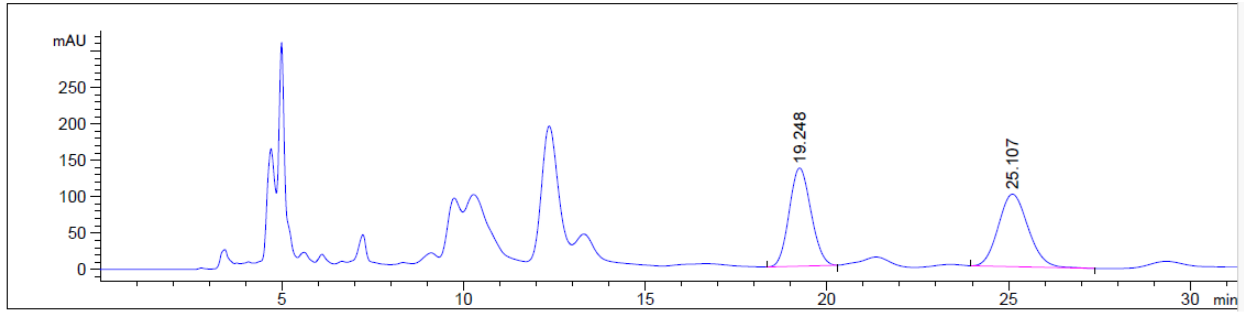

Signal 1: DAD1 B, Sig=254,4 Ref=off

| Peak # | RetTime [min] | Type | Width [min] | Area [mAU*s] | Height [mAU] | Area %  |
|--------|---------------|------|-------------|--------------|--------------|---------|
| 1      | 19.248        | BB   | 0.6482      | 5621.19385   | 134.88457    | 49.6854 |
| 2      | 25.107        | BB   | 0.8781      | 5692.38477   | 99.70365     | 50.3146 |

HPLC chromatogram of racemic **3ak**

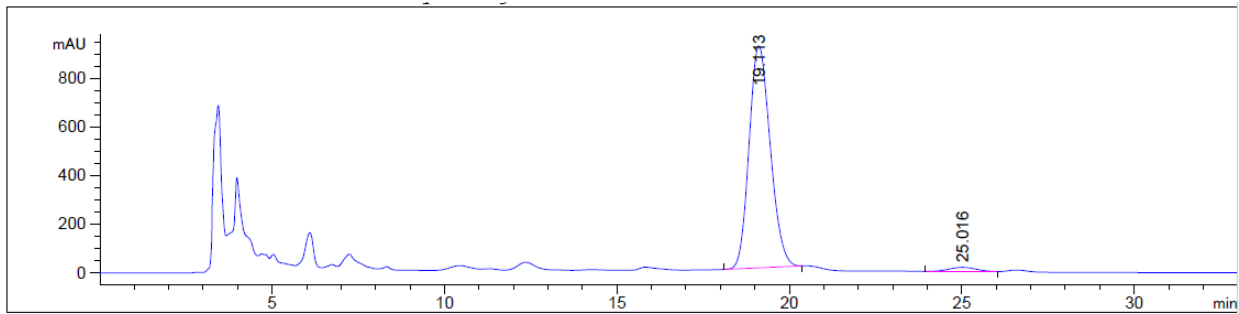

Signal 1: DAD1 B, Sig=254,4 Ref=off

| Peak # | RetTime [min] | Type | Width [min] | Area [mAU*s] | Height [mAU] | Area %  |
|--------|---------------|------|-------------|--------------|--------------|---------|
| 1      | 19.113        | BB   | 0.6607      | 3.89066e4    | 913.78870    | 97.7032 |
| 2      | 25.016        | BB   | 0.7598      | 914.61896    | 17.10519     | 2.2968  |

HPLC chromatogram of enantioenriched **3ak**

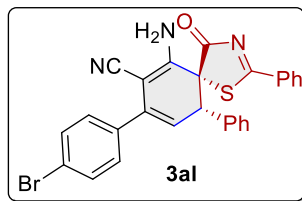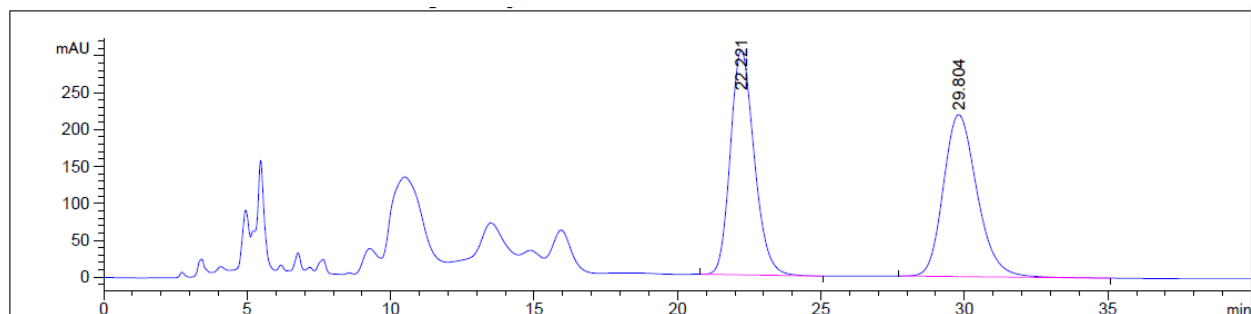

Signal 1: DAD1 B, Sig=254,4 Ref=off

| Peak # | RetTime [min] | Type | Width [min] | Area [mAU*s] | Height [mAU] | Area %  |
|--------|---------------|------|-------------|--------------|--------------|---------|
| 1      | 22.221        | BB   | 0.8936      | 1.75743e4    | 304.36880    | 49.5315 |
| 2      | 29.804        | BB   | 1.2525      | 1.79067e4    | 219.31947    | 50.4685 |

HPLC chromatogram of racemic **3al**

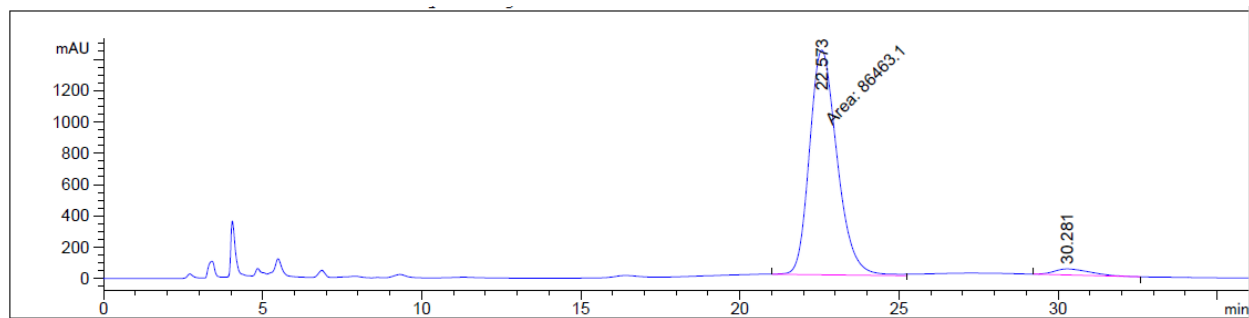

Signal 1: DAD1 B, Sig=254,4 Ref=off

| Peak # | RetTime [min] | Type | Width [min] | Area [mAU*s] | Height [mAU] | Area %  |
|--------|---------------|------|-------------|--------------|--------------|---------|
| 1      | 22.573        | MM   | 1.0051      | 8.64631e4    | 1433.78857   | 96.6743 |
| 2      | 30.281        | BBA  | 1.0733      | 2974.42920   | 38.16445     | 3.3257  |

HPLC chromatogram of enantioenriched **3al**

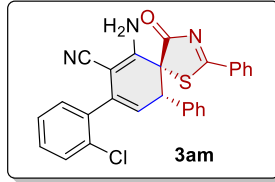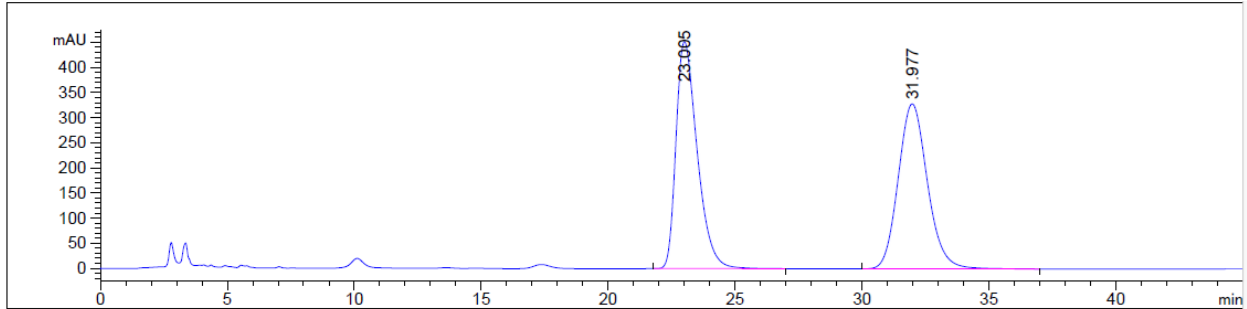

Signal 1: DAD1 A, Sig=250,4 Ref=off

| Peak # | RetTime [min] | Type | Width [min] | Area [mAU*s] | Height [mAU] | Area %  |
|--------|---------------|------|-------------|--------------|--------------|---------|
| 1      | 23.005        | BB   | 0.8846      | 2.62190e4    | 452.11755    | 49.9730 |
| 2      | 31.977        | BB   | 1.2281      | 2.62474e4    | 328.52502    | 50.0270 |

HPLC chromatogram of racemic **3am**

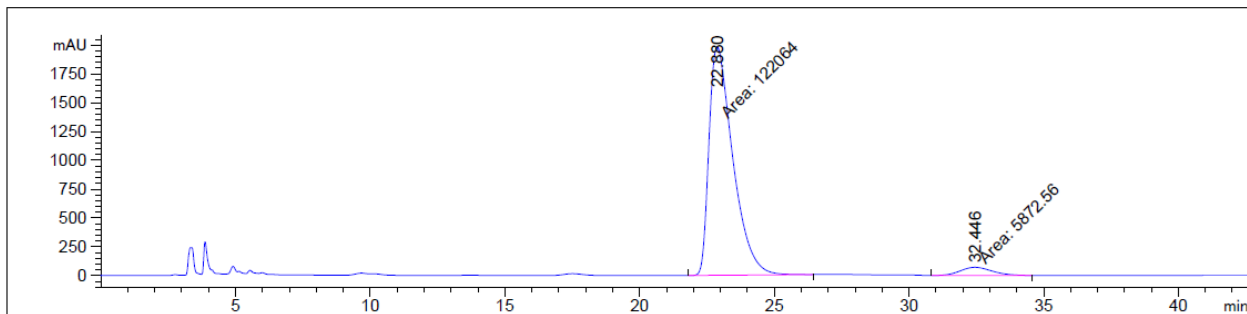

Signal 1: DAD1 A, Sig=250,4 Ref=off

| Peak # | RetTime [min] | Type | Width [min] | Area [mAU*s] | Height [mAU] | Area %  |
|--------|---------------|------|-------------|--------------|--------------|---------|
| 1      | 22.880        | MM   | 1.0256      | 1.22064e5    | 1983.56873   | 95.4098 |
| 2      | 32.446        | MF   | 1.3811      | 5872.56201   | 70.86717     | 4.5902  |

HPLC chromatogram of enantioenriched **3am**

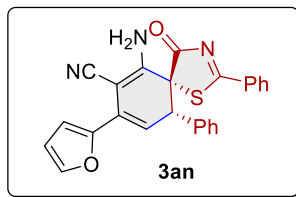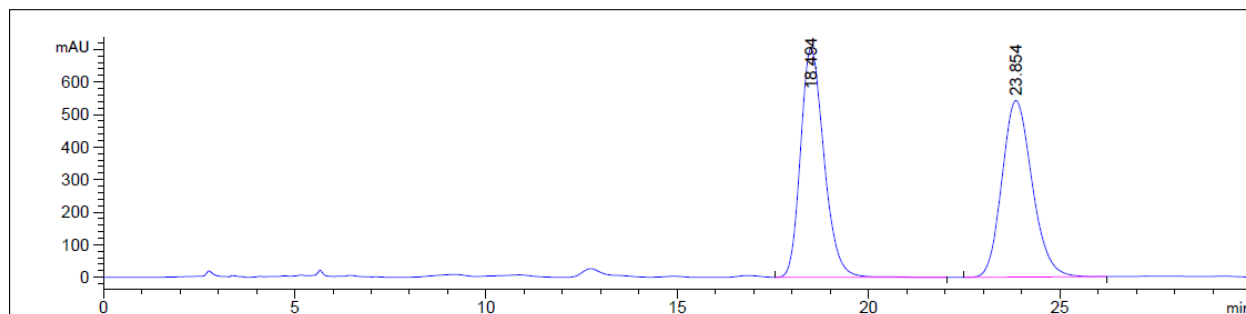

Signal 1: DAD1 A, Sig=250,4 Ref=off

| Peak # | RetTime [min] | Type | Width [min] | Area [mAU*s] | Height [mAU] | Area %  |
|--------|---------------|------|-------------|--------------|--------------|---------|
| 1      | 18.494        | BB   | 0.6592      | 3.00459e4    | 702.24933    | 50.2101 |
| 2      | 23.854        | BB   | 0.8484      | 2.97945e4    | 542.82422    | 49.7899 |

HPLC chromatogram of racemic **3an**

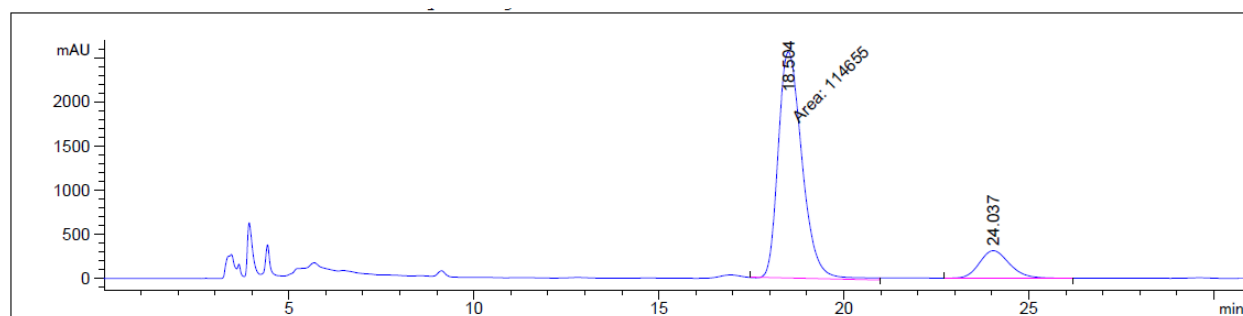

Signal 1: DAD1 A, Sig=250,4 Ref=off

| Peak # | RetTime [min] | Type | Width [min] | Area [mAU*s] | Height [mAU] | Area %  |
|--------|---------------|------|-------------|--------------|--------------|---------|
| 1      | 18.504        | MM   | 0.7470      | 1.14655e5    | 2558.20605   | 86.8188 |
| 2      | 24.037        | BB   | 0.8654      | 1.74075e4    | 310.80289    | 13.1812 |

HPLC chromatogram of enantioenriched **3an**

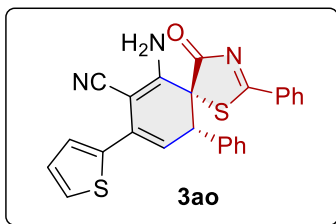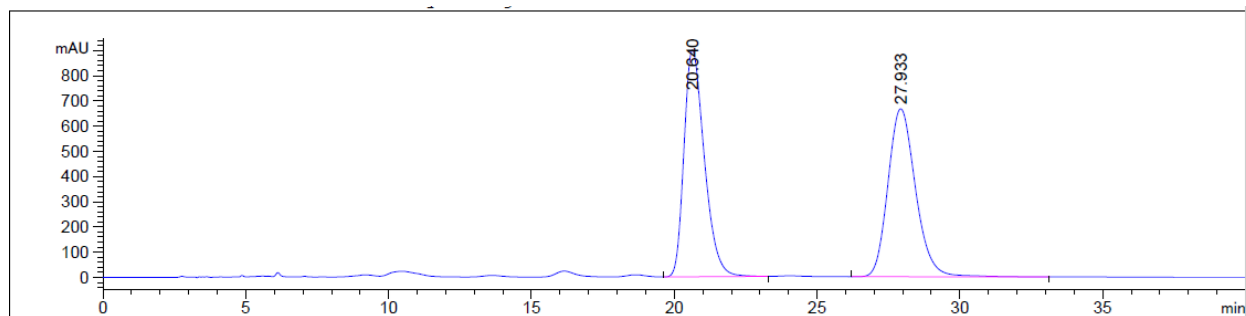

Signal 1: DAD1 A, Sig=250,4 Ref=off

| Peak # | RetTime [min] | Type | Width [min] | Area [mAU*s] | Height [mAU] | Area %  |
|--------|---------------|------|-------------|--------------|--------------|---------|
| 1      | 20.640        | BB   | 0.7640      | 4.45914e4    | 900.01019    | 49.8957 |
| 2      | 27.933        | BB   | 1.0379      | 4.47778e4    | 666.42883    | 50.1043 |

HPLC chromatogram of racemic **3ao**

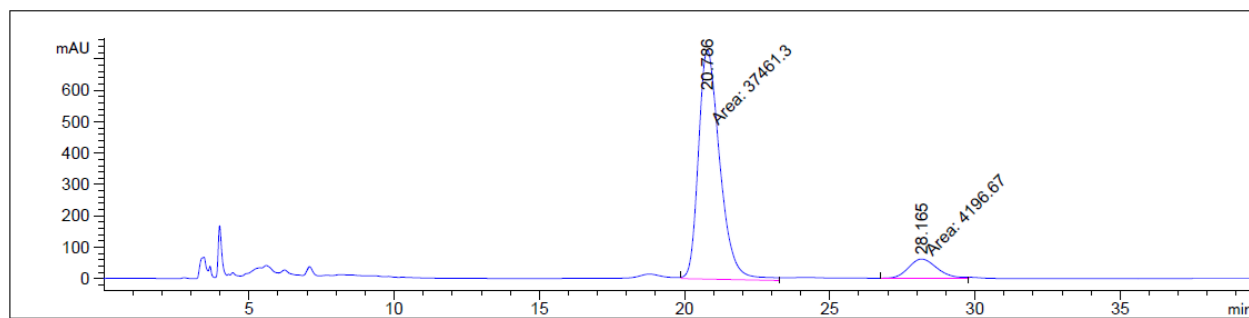

Signal 1: DAD1 A, Sig=250,4 Ref=off

| Peak # | RetTime [min] | Type | Width [min] | Area [mAU*s] | Height [mAU] | Area %  |
|--------|---------------|------|-------------|--------------|--------------|---------|
| 1      | 20.786        | MM   | 0.8551      | 3.74613e4    | 730.13049    | 89.9259 |
| 2      | 28.165        | MF   | 1.1400      | 4196.66748   | 61.35361     | 10.0741 |

HPLC chromatogram of enantioenriched **3ao**

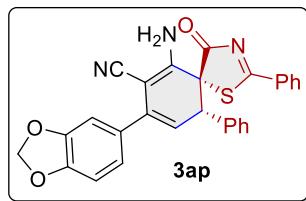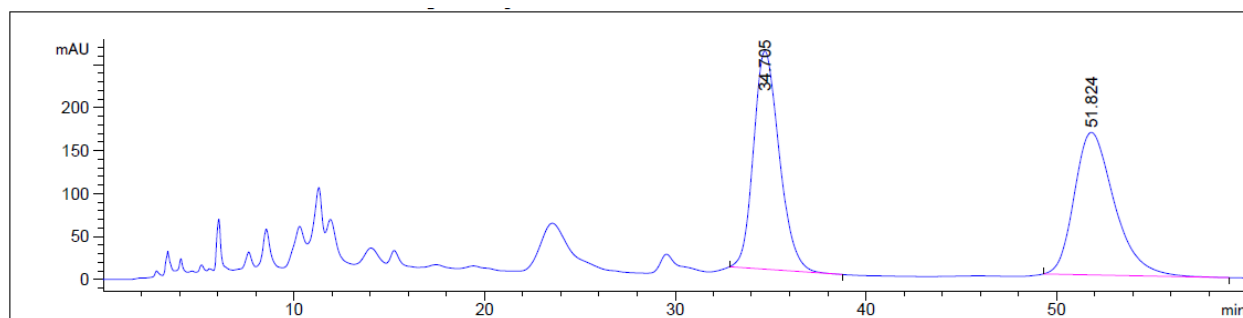

| Peak # | RetTime [min] | Type | Width [min] | Area [mAU*s] | Height [mAU] | Area %  |
|--------|---------------|------|-------------|--------------|--------------|---------|
| 1      | 34.705        | BB   | 1.3646      | 2.38513e4    | 253.76091    | 49.6442 |
| 2      | 51.824        | BB   | 2.0429      | 2.41932e4    | 165.74669    | 50.3558 |

HPLC chromatogram of racemic **3ap**

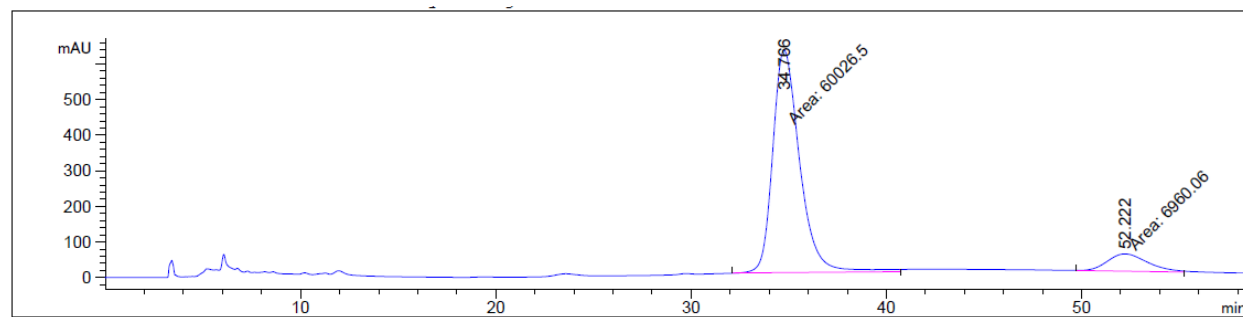

| Peak # | RetTime [min] | Type | Width [min] | Area [mAU*s] | Height [mAU] | Area %  |
|--------|---------------|------|-------------|--------------|--------------|---------|
| 1      | 34.766        | MM   | 1.5994      | 6.00265e4    | 625.51733    | 89.6098 |
| 2      | 52.222        | MF   | 2.3805      | 6960.05615   | 48.72953     | 10.3902 |

HPLC chromatogram of enantioenriched **3ap**

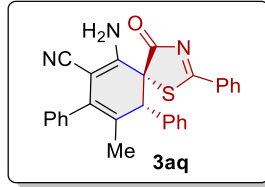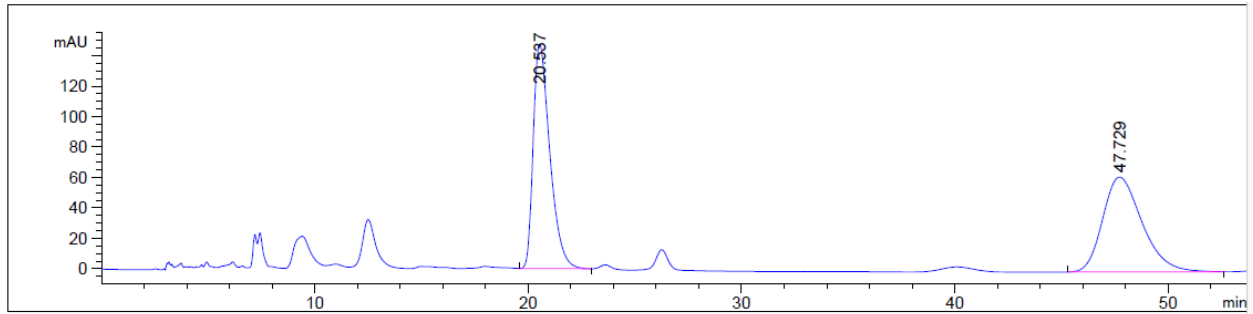

| Peak # | RetTime [min] | Type | Width [min] | Area [mAU*s] | Height [mAU] | Area %  |
|--------|---------------|------|-------------|--------------|--------------|---------|
| 1      | 20.537        | BB   | 0.8224      | 7971.19678   | 147.51506    | 49.9153 |
| 2      | 47.729        | BB   | 1.5746      | 7998.26172   | 62.34973     | 50.0847 |

HPLC chromatogram of racemic **3aq**

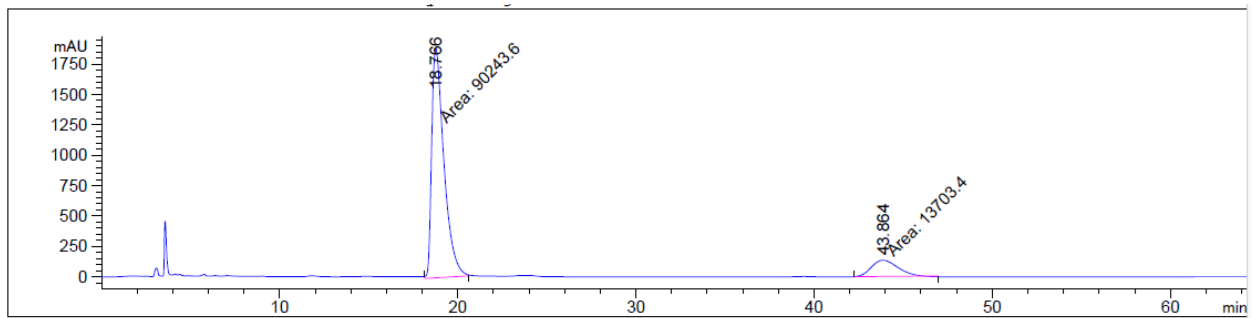

| Peak # | RetTime [min] | Type | Width [min] | Area [mAU*s] | Height [mAU] | Area %  |
|--------|---------------|------|-------------|--------------|--------------|---------|
| 1      | 18.766        | MM   | 0.7960      | 9.02436e4    | 1889.53442   | 86.8169 |
| 2      | 43.864        | MM   | 1.7079      | 1.37034e4    | 133.72675    | 13.1831 |

HPLC chromatogram of enantioenriched **3aq**



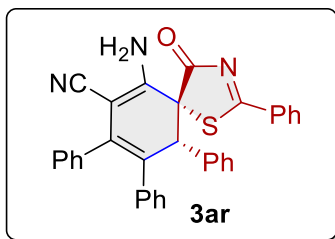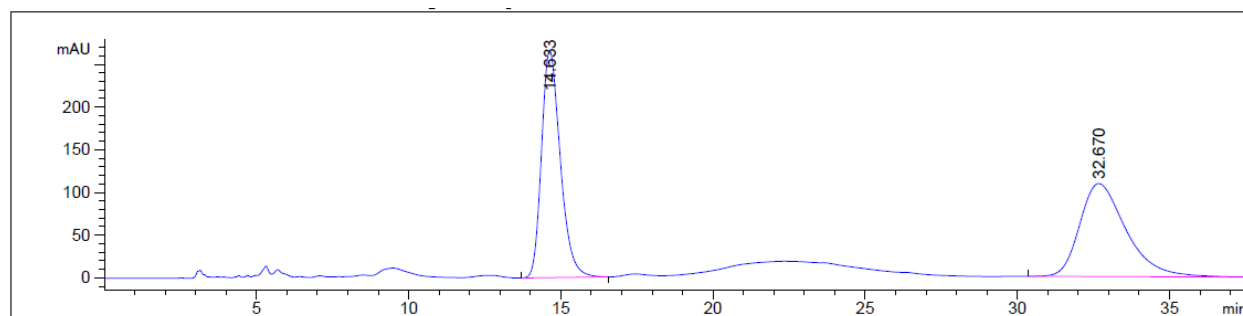

Signal 1: DAD1 B, Sig=254,4 Ref=off

| Peak # | RetTime [min] | Type | Width [min] | Area [mAU*s] | Height [mAU] | Area %  |
|--------|---------------|------|-------------|--------------|--------------|---------|
| 1      | 14.633        | BB   | 0.6628      | 1.14044e4    | 265.69263    | 49.7316 |
| 2      | 32.670        | BBA  | 1.5524      | 1.15275e4    | 108.94885    | 50.2684 |

HPLC chromatogram of racemic **3ar**

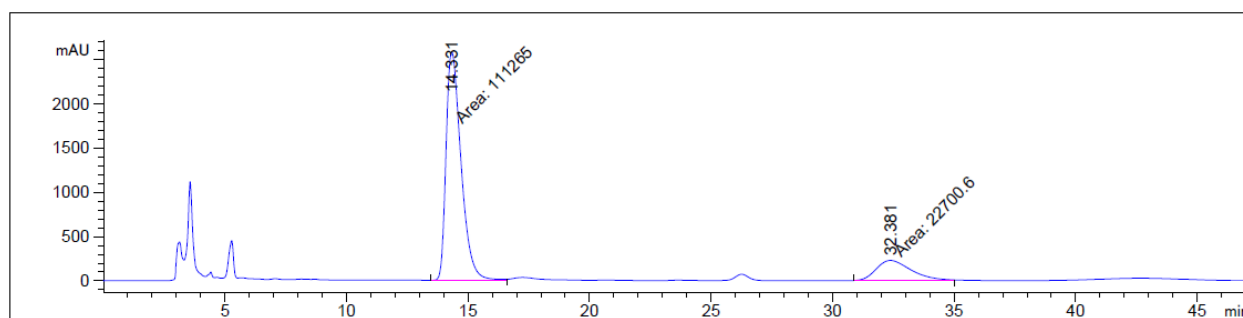

Signal 1: DAD1 B, Sig=254,4 Ref=off

| Peak # | RetTime [min] | Type | Width [min] | Area [mAU*s] | Height [mAU] | Area %  |
|--------|---------------|------|-------------|--------------|--------------|---------|
| 1      | 14.331        | MM   | 0.7175      | 1.11265e5    | 2584.59888   | 83.0549 |
| 2      | 32.381        | MM   | 1.6699      | 2.27006e4    | 226.56496    | 16.9451 |

HPLC chromatogram of enantioenriched **3ar**

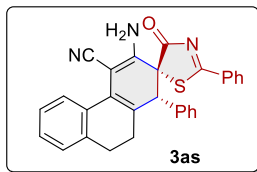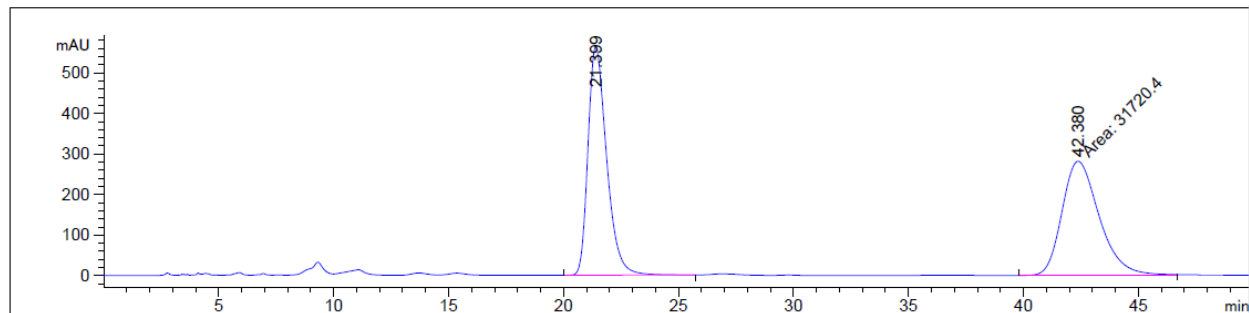

Signal 1: DAD1 B, Sig=254,4 Ref=off

| Peak # | RetTime [min] | Type | Width [min] | Area [mAU*s] | Height [mAU] | Area %  |
|--------|---------------|------|-------------|--------------|--------------|---------|
| 1      | 21.399        | BB   | 0.8599      | 3.17420e4    | 562.85950    | 50.0170 |
| 2      | 42.380        | MF   | 1.8782      | 3.17204e4    | 281.48090    | 49.9830 |

HPLC chromatogram of racemic **3as**

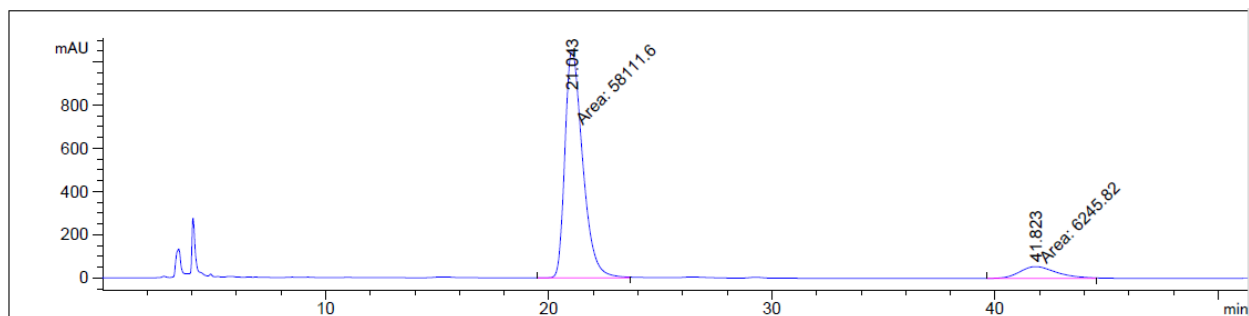

Signal 1: DAD1 B, Sig=254,4 Ref=off

| Peak # | RetTime [min] | Type | Width [min] | Area [mAU*s] | Height [mAU] | Area %  |
|--------|---------------|------|-------------|--------------|--------------|---------|
| 1      | 21.043        | MF   | 0.9174      | 5.81116e4    | 1055.75635   | 90.2951 |
| 2      | 41.823        | MF   | 1.9124      | 6245.82031   | 54.43129     | 9.7049  |

HPLC chromatogram of enantioenriched **3as**

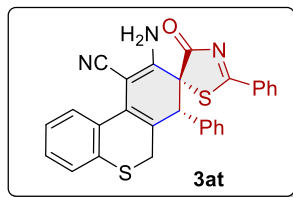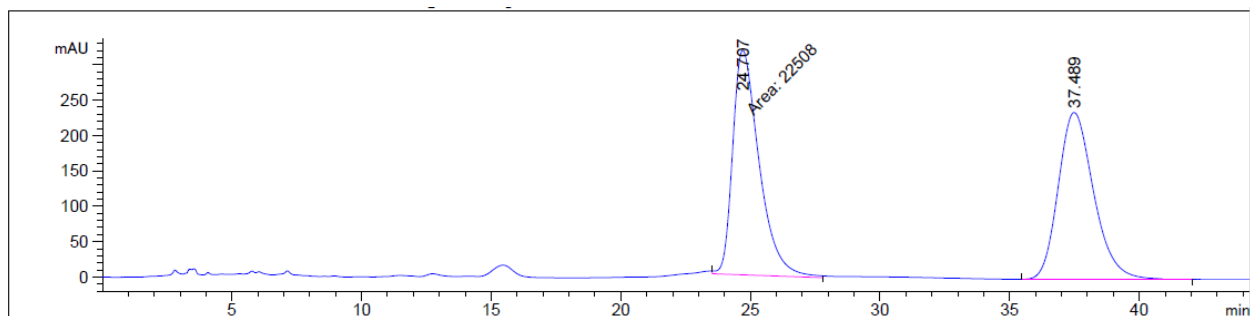

HPLC chromatogram of racemic **3at**

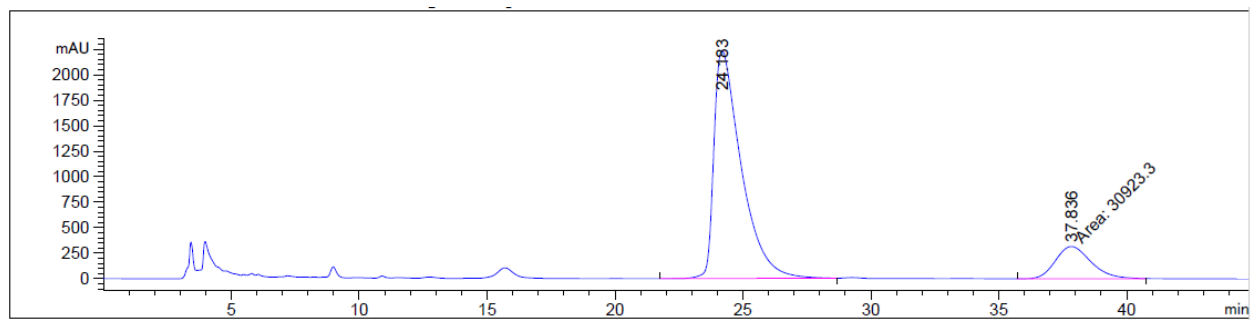

HPLC chromatogram of enantioenriched **3at**

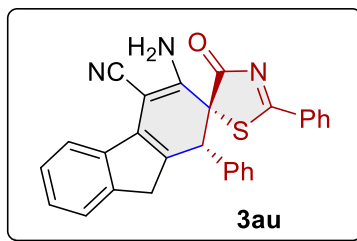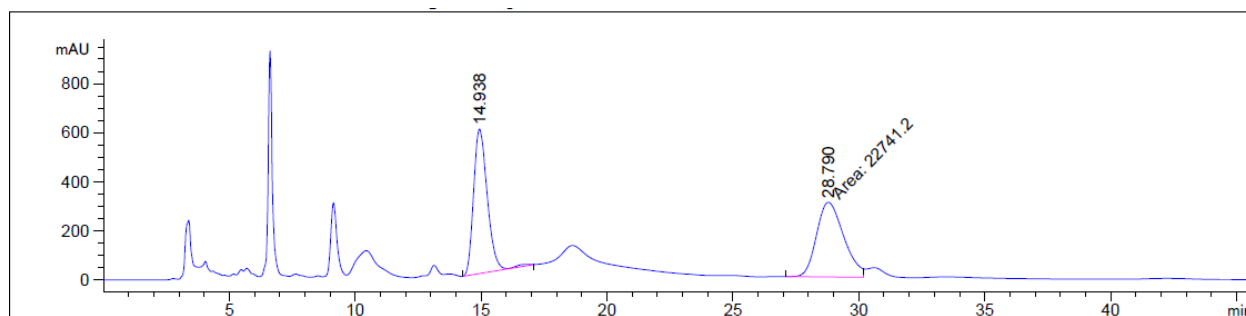

Signal 1: DAD1 A, Sig=250,4 Ref=off

| Peak # | RetTime [min] | Type | Width [min] | Area [mAU*s] | Height [mAU] | Area %  |
|--------|---------------|------|-------------|--------------|--------------|---------|
| 1      | 14.938        | BV R | 0.5817      | 2.23486e4    | 588.72455    | 49.5647 |
| 2      | 28.790        | MF   | 1.2461      | 2.27412e4    | 304.17151    | 50.4353 |

HPLC chromatogram of racemic **3au**

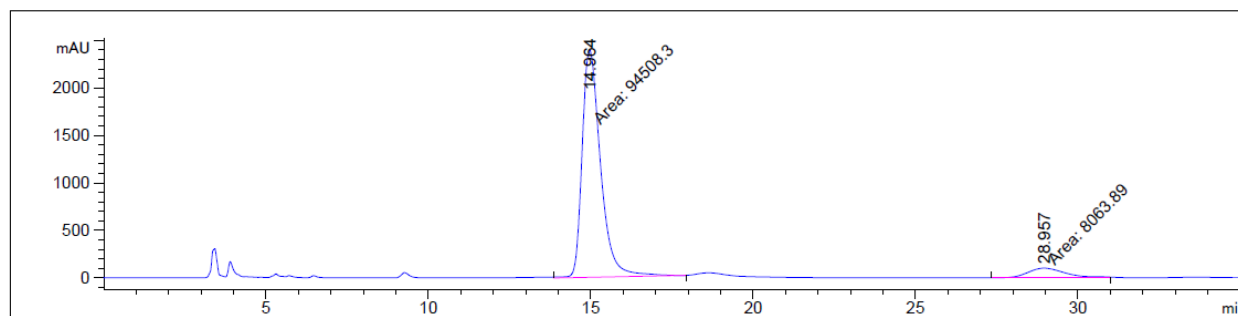

Signal 1: DAD1 A, Sig=250,4 Ref=off

| Peak # | RetTime [min] | Type | Width [min] | Area [mAU*s] | Height [mAU] | Area %  |
|--------|---------------|------|-------------|--------------|--------------|---------|
| 1      | 14.964        | MM   | 0.6575      | 9.45083e4    | 2395.60498   | 92.1383 |
| 2      | 28.957        | MF   | 1.3314      | 8063.89111   | 100.94608    | 7.8617  |

HPLC chromatogram of enantioenriched **3au**

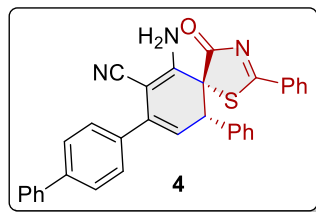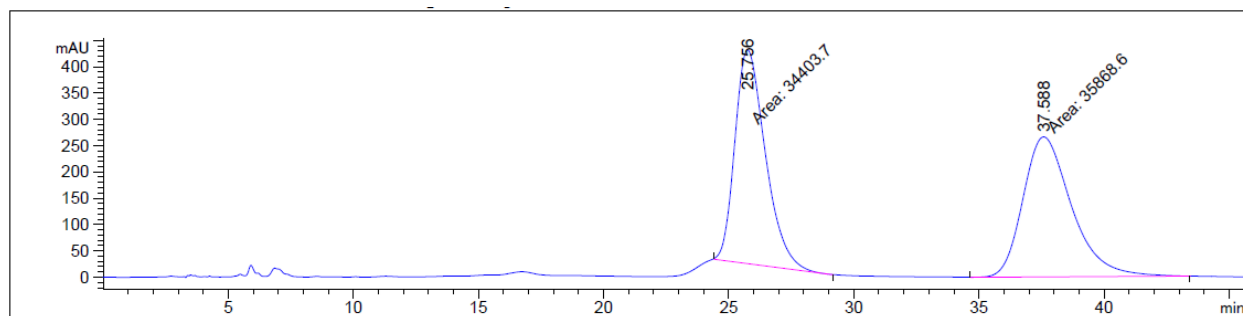

Signal 1: DAD1 B, Sig=254,4 Ref=off

| Peak # | RetTime [min] | Type | Width [min] | Area [mAU*s] | Height [mAU] | Area %  |
|--------|---------------|------|-------------|--------------|--------------|---------|
| 1      | 25.756        | MM   | 1.4109      | 3.44037e4    | 406.39673    | 48.9576 |
| 2      | 37.588        | MM   | 2.2467      | 3.58686e4    | 266.08871    | 51.0424 |

HPLC chromatogram of racemic 4

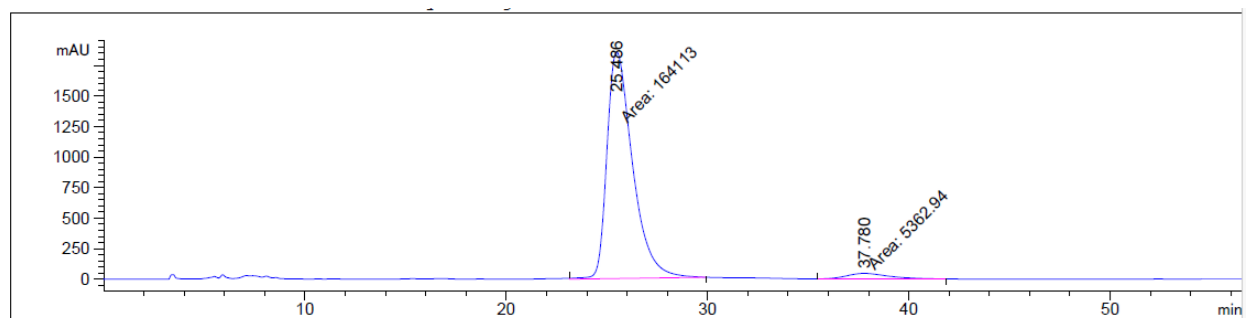

Signal 1: DAD1 B, Sig=254,4 Ref=off

| Peak # | RetTime [min] | Type | Width [min] | Area [mAU*s] | Height [mAU] | Area %  |
|--------|---------------|------|-------------|--------------|--------------|---------|
| 1      | 25.486        | MM   | 1.4749      | 1.64113e5    | 1854.45703   | 96.8356 |
| 2      | 37.780        | MM   | 2.1624      | 5362.93555   | 41.33546     | 3.1644  |

HPLC chromatogram of enantioenriched 4
